# Supplementary material for: Vaccine Preventable Disease Seroprevalence in a Nationwide Assessment of Timor-Leste (VASINA-TL): study protocol for a population-representative cross-sectional serosurvey
Source: PubMed Central journal article supplement — BMJ Open. 2023 May 18;13(5):e071381. doi: 10.1136/bmjopen-2022-071381 (PMC10201250; doi:10.1136/bmjopen-2022-071381), 2023-05-18
Supplement: bmjopen-2022-071381.draft_revisions.pdf [file bmjopen-2022-071381.draft_revisions.pdf]

# BMJ Open

BMJ Open is committed to open peer review. As part of this commitment we make the peer review history of every article we publish publicly available.

When an article is published we post the peer reviewers' comments and the authors' responses online. We also post the versions of the paper that were used during peer review. These are the versions that the peer review comments apply to.

The versions of the paper that follow are the versions that were submitted during the peer review process. They are not the versions of record or the final published versions. They should not be cited or distributed as the published version of this manuscript.

BMJ Open is an open access journal and the full, final, typeset and author-corrected version of record of the manuscript is available on our site with no access controls, subscription charges or pay-per-view fees (<http://bmjopen.bmj.com>).

If you have any questions on BMJ Open's open peer review process please email [info.bmjopen@bmj.com](mailto:info.bmjopen@bmj.com)

# BMJ Open

## Vaccine Preventable Disease Seroprevalence In a Nationwide Assessment of Timor-Leste (VASINA-TL) - study protocol for a population-representative cross-sectional serosurvey

|                               |                                                                                                                                                                                                                                                                                                                                                                                                                                                                                                                                                                                                                                                                                                                                                                                                                                                                                                                                                                                                                                                                                                                                                                                                                                                                                                                                                                                                                                                                                                                                                                                                                                                                                                                                                                                                                                                                                                                                                                                                       |
|-------------------------------|-------------------------------------------------------------------------------------------------------------------------------------------------------------------------------------------------------------------------------------------------------------------------------------------------------------------------------------------------------------------------------------------------------------------------------------------------------------------------------------------------------------------------------------------------------------------------------------------------------------------------------------------------------------------------------------------------------------------------------------------------------------------------------------------------------------------------------------------------------------------------------------------------------------------------------------------------------------------------------------------------------------------------------------------------------------------------------------------------------------------------------------------------------------------------------------------------------------------------------------------------------------------------------------------------------------------------------------------------------------------------------------------------------------------------------------------------------------------------------------------------------------------------------------------------------------------------------------------------------------------------------------------------------------------------------------------------------------------------------------------------------------------------------------------------------------------------------------------------------------------------------------------------------------------------------------------------------------------------------------------------------|
| Journal:                      | <i>BMJ Open</i>                                                                                                                                                                                                                                                                                                                                                                                                                                                                                                                                                                                                                                                                                                                                                                                                                                                                                                                                                                                                                                                                                                                                                                                                                                                                                                                                                                                                                                                                                                                                                                                                                                                                                                                                                                                                                                                                                                                                                                                       |
| Manuscript ID                 | bmjopen-2022-071381                                                                                                                                                                                                                                                                                                                                                                                                                                                                                                                                                                                                                                                                                                                                                                                                                                                                                                                                                                                                                                                                                                                                                                                                                                                                                                                                                                                                                                                                                                                                                                                                                                                                                                                                                                                                                                                                                                                                                                                   |
| Article Type:                 | Protocol                                                                                                                                                                                                                                                                                                                                                                                                                                                                                                                                                                                                                                                                                                                                                                                                                                                                                                                                                                                                                                                                                                                                                                                                                                                                                                                                                                                                                                                                                                                                                                                                                                                                                                                                                                                                                                                                                                                                                                                              |
| Date Submitted by the Author: | 09-Feb-2023                                                                                                                                                                                                                                                                                                                                                                                                                                                                                                                                                                                                                                                                                                                                                                                                                                                                                                                                                                                                                                                                                                                                                                                                                                                                                                                                                                                                                                                                                                                                                                                                                                                                                                                                                                                                                                                                                                                                                                                           |
| Complete List of Authors:     | <p>Arkell, Paul; Menzies School of Health Research Timor-Leste Office<br/>           Sheridan, Sarah L; National Centre for Immunisation Research and Surveillance (NCIRS)<br/>           Martins, Nelson; Menzies School of Health Research Timor-Leste Office<br/>           Tanesi, Maria; Menzies School of Health Research Timor-Leste Office<br/>           Gomes, Nelia; Menzies School of Health Research Timor-Leste Office<br/>           Amaral, Salvador; Menzies School of Health Research Timor-Leste Office<br/>           Oakley, Tessa; Menzies School of Health Research Timor-Leste Office<br/>           Solano, Vanessa; Charles Darwin University<br/>           David, Michael; The University of Sydney, The Daffodil Centre; Griffith University, School of Medicine and Dentistry<br/>           Draper, Anthony ; Menzies School of Health Research Timor-Leste Office; Northern Territory Centre for Disease Control<br/>           Sarmento, Nevio; Menzies School of Health Research Timor-Leste Office<br/>           da Silva, Endang; Laboratório Nacional da Saúde<br/>           Alves, Lucsendar; Menzies School of Health Research<br/>           Freitas, Carlito; Ministry of Health<br/>           Machado, Filipe ; Ministry of Health<br/>           Gusmão, Celia; Hospital Nacional Guido Valadares<br/>           da Costa Barreto, Ismael; Menzies School of Health Research Timor-Leste Office; World Health Organisation<br/>           Fancourt, Nicholas ; Menzies School of Health Research Timor-Leste Office<br/>           Macartney, Kristine; The University of Sydney School of Medicine, National Centre for Immunisation Research and Surveillance<br/>           Yan, Jennifer; Menzies School of Health Research, Global and Tropical Health Division; Royal Darwin Hospital, Paediatrics<br/>           Francis, Joshua; Menzies School of Health Research, Global and Tropical Health Division; Royal Darwin Hospital, Paediatrics</p> |
| Keywords:                     | EPIDEMIOLOGY, EPIDEMIOLOGIC STUDIES, Diagnostic microbiology < INFECTIOUS DISEASES, Epidemiology < INFECTIOUS DISEASES, Public health < INFECTIOUS DISEASES, STATISTICS & RESEARCH METHODS                                                                                                                                                                                                                                                                                                                                                                                                                                                                                                                                                                                                                                                                                                                                                                                                                                                                                                                                                                                                                                                                                                                                                                                                                                                                                                                                                                                                                                                                                                                                                                                                                                                                                                                                                                                                            |
|                               |                                                                                                                                                                                                                                                                                                                                                                                                                                                                                                                                                                                                                                                                                                                                                                                                                                                                                                                                                                                                                                                                                                                                                                                                                                                                                                                                                                                                                                                                                                                                                                                                                                                                                                                                                                                                                                                                                                                                                                                                       |

1  
2  
3  
4  
5  
6  
7  
8  
9  
10  
11  
12  
13  
14  
15  
16  
17  
18  
19  
20  
21  
22  
23  
24  
25  
26  
27  
28  
29  
30  
31  
32  
33  
34  
35  
36  
37  
38  
39  
40  
41  
42  
43  
44  
45  
46  
47  
48  
49  
50  
51  
52  
53  
54  
55  
56  
57  
58  
59  
60

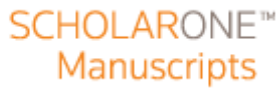

1  
2  
3 **Vaccine Preventable Disease Seroprevalence In a Nationwide Assessment of Timor-**  
4 **Leste (VASINA-TL) - study protocol for a population-representative cross-sectional**  
5 **serosurvey**  
6

7 Paul Arkell<sup>1\*</sup>, Sarah L Sheridan<sup>2</sup>, Nelson Martins<sup>1</sup>, Maria Y Tanesi<sup>1</sup>, Nelia Gomes<sup>1</sup>, Salvador  
8 Amaral<sup>1</sup>, Tessa Oakley<sup>1</sup>, Vanessa Solano<sup>3</sup>, Michael David<sup>4,5</sup>, Anthony DK Draper<sup>1,6,7</sup>, Nevio  
9 Sarmiento<sup>1</sup>, Endang da Silva<sup>8</sup>, Lucsendar Alves<sup>1</sup>, Carlito Freitas<sup>9</sup>, Filipe de Neri Machado<sup>9</sup>,  
10 Celia A Gusmão<sup>10</sup>, Ismael da Costa Barreto<sup>1,11</sup>, Nicholas SS Fancourt<sup>1</sup>, Kristine  
11 Macartney<sup>2,12</sup>, Jennifer Yan<sup>1</sup>, Joshua R Francis<sup>1</sup>  
12

- 13  
14 1. Global and Tropical Health Division, Menzies School of Health Research, Charles  
15 Darwin University, Dili, Timor-Leste  
16  
17 2. National Centre for Immunisation Research and Surveillance (NCIRS), Westmead,  
18 NSW, Australia  
19  
20 3. Research Institute for the Environment and Livelihoods, Charles Darwin University,  
21 Darwin, Australia  
22  
23 4. Daffodil Centre, The University of Sydney, a joint venture with Cancer Council New  
24 South Wales, Sydney, NSW, Australia  
25  
26 5. School of Medicine & Dentistry, Griffith University, Gold Coast, QLD, Australia  
27  
28 6. Northern Territory Centre for Disease Control, Darwin, Australia  
29  
30 7. National Centre for Epidemiology and Population Health, Australian National  
31 University, Canberra, Australia  
32  
33 8. Laboratório Nacional da Saúde, Dili, Timor-Leste  
34  
35 9. Ministry of Health, Dili, Timor-Leste  
36  
37 10. Hospital Nacional Guido Valadares, Dili, Timor-Leste  
38  
39 11. World Health Organisation, Dili, Timor-Leste  
40  
41 12. Faculty of Medicine and Health, University of Sydney, Australia  
42

43 \*Corresponding author:

44 Dr Paul Arkell, email: paul.arkell@menzies.edu.au  
45  
46

47 **Data availability:** This protocol does not report results. All relevant data are within the  
48 paper and its supporting information files.  
49

50 **Word count:** 4381  
51  
52  
53  
54  
55  
56  
57  
58  
59  
60

## ABSTRACT

**Introduction:** Historic disruption in health infrastructure combined with data from a recent vaccine coverage survey suggests there are likely significant immunity gaps to vaccine preventable diseases and high risk of outbreaks in Timor-Leste. Community-based serological surveillance is an important tool to augment understanding of population-level immunity achieved through vaccine coverage and/or derived from prior infection.

**Methods and analysis:** This national population-representative serosurvey will take a three-stage cluster sample and aims to include 5600 individuals above one year of age. Serum samples will be collected by phlebotomy and analysed for measles immunoglobulin G (IgG), rubella IgG, severe acute respiratory syndrome coronavirus-2 anti-spike protein IgG, hepatitis B surface antibody and hepatitis B core antigen using commercially available chemiluminescent immunoassays or enzyme-linked immunosorbent assays. In addition to crude prevalence estimates and to account for differences in Timor-Leste's age structure, we will calculate stratified age-standardised prevalence estimates, using Asia in 2013 as the standard population. Additionally, this survey will derive a national asset of serum and dried blood spot samples which can be used for further investigation of infectious disease sero-epidemiology and/or validation of existing and novel serological assays for infectious diseases.

**Ethics and dissemination:** Ethical approval has been obtained from the Research Ethics and Technical Committee of the Instituto Nacional da Saúde, Timor-Leste and the Human Research Ethics Committee of the Northern Territory Department of Health and Menzies School of Health Research, Australia. Co-designing this study with Timor-Leste Ministry-of-Health and other relevant partner organisations will allow immediate translation of findings into public health policy (which may include changes to routine immunisation service delivery and/or plans for supplementary immunisation activities).

## STRENGTHS AND LIMITATIONS OF THIS STUDY

This project is one of very few large-scale, community-based, population-representative serosurveys to be conducted in low-middle income countries.

It will provide accurate seroprevalence estimates for multiple vaccine-preventable diseases, which will immediately inform public health policy and support an ongoing programme of vaccine research in Timor-Leste and the surrounding region.

A national asset of bio-banked serum samples will be derived, which can be used in cross-sectional and prospective studies of infectious disease epidemiology, including those which evaluate disease control interventions.

Diverse, remote communities across Timor-Leste will be visited, with primary sample analysis occurring at the National Health Laboratory in Timor-Leste. Therefore, fieldwork and laboratory-related logistical challenges will need to be overcome.

## INTRODUCTION

The Democratic Republic of Timor-Leste (Timor-Leste) achieved independence in 2002. It is a half-island nation located between Australia and Indonesia with a population of 1.3 million people. The Expanded Program on Immunisation (EPI) began *circa* 1989 when Timor-Leste was still an Indonesian province. In 1999 there was significant disruption of healthcare infrastructure, including the near cessation of routine vaccine delivery. After independence was regained in 2002, the EPI was reinstated as part of a national vaccination programme, initially with single-dose measles vaccine. Hepatitis B vaccination in infancy (three doses) was introduced by 2007. Birth dose hepatitis B vaccine was introduced in 2016, along with combined measles-rubella (MR) vaccination (two doses). Vaccination against severe acute respiratory syndrome coronavirus 2 (SARS-CoV-2) began in adults in April 2021 and children above 12 years of age in October 2021.

The most comprehensive recent assessment of routine childhood vaccination coverage in Timor-Leste was a survey undertaken in 2018 which used a combination of maternal history and vaccination card review to confirm doses of vaccines given in the first and second years of life. This study found variable uptake between different vaccines and across geographic regions, and highlighted the need for further investigation of population immunity to vaccine-preventable diseases (VPDs, see table 1).<sup>1</sup>

<Table 1 here>

For many pathogens, including measles, rubella, hepatitis B and SARS-CoV-2, specific immunoglobulin G (IgG) antibodies can be detected in the blood for many years, and sometimes lifelong, following infection or vaccination. In some cases, a specific quantity and/or quality of antibody in individuals' sera has been associated with protection from infection upon subsequent exposure. Presence above antibody cut-off levels can in some contexts infer protection, although how much such levels correlate with protection, varies on a range of factors.<sup>2,3</sup> Nonetheless, community-based serological surveillance is an

1  
2  
3 important tool to augment understanding of population level immunity achieved through  
4 vaccine coverage over many years and/or immunity to VPDs derived from prior infection.<sup>4</sup>  
5

6  
7 The results of serosurveys can be used to guide supplementary immunisation activities  
8 (SIAs), and tailor routine immunisation service delivery. There have been no previous  
9  
10 community-based studies estimating VPD seroprevalence in Timor-Leste.  
11  
12

13  
14 This paper describes the protocol for a first and comprehensive national population-  
15 representative serosurvey of multiple VPDs. The survey is also designed to derive a national  
16  
17 asset of serum and dried blood spot (DBS) samples which can be used for further  
18  
19 investigation of infectious disease sero-epidemiology in Timor-Leste.  
20  
21  
22

## 23 24 25 26 **METHODS AND ANALYSIS**

27  
28  
29 **Aim:** To determine the seroprevalence of measles, rubella, hepatitis B and SARS-CoV-2  
30 among individuals of different age-strata in Timor-Leste.  
31  
32

33  
34 **Design:** Population-representative, national cross-sectional serological survey.  
35

36  
37 **Setting:** Recruitment and data collection will occur in the community (within households)  
38 across Timor-Leste. Laboratory analysis will occur at Laboratório Nacional da Saúde (LNS)  
39 in Dili, Timor-Leste.  
40  
41

42  
43 **Sampling methods:** Timor-Leste is made up of 12 municipalities and one Special Region  
44 (*Região Administrativa Especial de Oecusse Ambeno*), some of which are divided into sub-  
45 municipalities (*Posto administrativos*). Atauro is a 14th municipality but through legacy is  
46 included as part of the Municipality of Dili. Each (sub-)municipality is divided into *sucos*  
47 (villages), which are further divided into *aldeias* (hamlets). In 2015, a national census took  
48 place in Timor-Leste. All households in the country were visited in-person, assigned a  
49 household number and global positioning (GPS) coordinates, and grouped into 2320  
50  
51  
52  
53  
54  
55  
56  
57  
58  
59  
60



1  
2  
3 'enumeration areas' (EAs, the boundaries of which roughly correspond to those of each  
4 aldeia, see Figure 1).

5  
6  
7  
8 <Figure 1 here>

9  
10  
11 A three-stage cluster random sample will be taken. First, a pre-specified number of EAs will  
12 be randomly selected from all EAs in the country, with probability proportionate to  
13 municipality population. Second, within each participating EA, a pre-specified number of  
14 households will be randomly selected from all households in that EA. Third, all occupants at  
15 participating households who meet eligibility criteria will be invited into the study.

16  
17  
18 A household will be defined as a dwelling unit that consists of a person or a group of related  
19 or unrelated persons, who live together in the same dwelling unit or informal shelter, who are  
20 considered as one unit and share a cooking area.

21  
22  
23  
24  
25  
26  
27  
28  
29 **Eligibility criteria:** Household members will be eligible to participate if they are  $\geq 1$  year of  
30 age and they (or their parent/guardian) provide consent to participate in the study.

31  
32  
33 Individuals who report current illness which is compatible with coronavirus disease (COVID-  
34 19), and those who report any of the following conditions will be excluded:

- 35  
36  
37  
38 - Needle phobia  
39  
40  
41 - Anaemia  
42  
43  
44 - Skin condition affecting phlebotomy sites  
45  
46  
47 - Bleeding disorder

48  
49 Additionally, individuals who cannot communicate verbally in Tetum, Portuguese or English  
50 will be excluded.

51  
52  
53  
54 **Sample size:** The sample size estimation and the proposed parameters are described in  
55 Table 2. Age groups of 1-4, 5-14, 15-24, 25-40, and >40 years have been considered as  
56 separate strata, for a range of reasons, with some including:  
57  
58  
59  
60

- Measles in children under 5 years of age because they are most likely to suffer serious sequelae from infection when compared to other age groups<sup>5</sup> and between 5-14 years of age because outbreaks can occur and/or amplify in schools and other settings where groups of children from different households congregate.
- Rubella in women 15-40 years of age because future pregnancies may be at risk of congenital rubella syndrome (CRS). It is anticipated that rubella virus is circulating in Timor-Leste as there has only been recent introduction of rubella vaccination and there is very little surveillance for CRS.
- SARS-CoV-2 in children 1-12 years of age because seropositivity is likely to represent naturally acquired infection as this group are not eligible for vaccination in Timor-Leste, and so it will give an indication of the extent of local transmission which has occurred.
- Hepatitis B (surface antibody, HBsAb and core antibody, HBcAb) in children under 5 and 5-14 years of age because hepatitis B birth vaccination was introduced approximately 5 years ago and comparison of these groups will give an indication of uptake.

The required sample size for this multi-stage survey (householders within households within EAs) will need to power seroprevalence estimates with a precision of 6%. For the first step of this determination and assuming 50% seroprevalence, a simple random sample of 280 will be required for each of the five age strata. Using an intraclass correlation of 0.333, which accounts for dependence among households and households at the second and third stages, respectively, this sample size was then adjusted by the design effect of four in step 2. Thus the required effective sample size for each stratum was calculated to be 1120. As non-response is expected to be minimal, there was no need to adjust this figure by a non-response factor. Lastly, and considering the five strata, the required sample size is estimated to be 5600.

The formula for the sample size calculation is:

$$N = \frac{p}{\Delta^2} \cdot (1-p)^{n-1} \cdot [1 + (n-1) \cdot \rho] \cdot K$$

Where,

$\Delta$  = precision estimate

$p$  = seroprevalence estimate

$n$  = mean number of householders in a household estimate

$\rho$  = intraclass correlation coefficient estimate

$K$  = number of age strata

<Table 2 here>

**Fieldwork procedures:** Municipalities will be visited sequentially depending on various logistical considerations including weather and road conditions, availability of staff, vehicles, and accommodation, and local municipal and health leader preference.

First, the study team leader will make a 'coordination visit' to the municipality during which they will explain the study procedures, receive permission to conduct the study, and discuss travel routes and gaining access to each EA with the following individuals:

- Municipality Administrator (at Municipality Office; one per municipality)
- Director of Municipality Health Service (at Municipality Health Service Office; one per municipality)
- Sub-Municipality Administrator (at Administrative Post Offices; one for each sub-municipality being visited)
- Head of Community Health Centre (at Community Health Centre Office; one for each sub-municipality being visited)
- Chief of Suco (at Suco Office; 1 for every suco being visited)
- Commander of Police in Suco (at Suco Police Station; one per suco being visited, at the discretion of the Chief of Suco)

- 1  
2  
3 - Chief of Aldeia (at Aldeia Office; one for every aldeia being visited)  
4  
5

6 If any of these individuals are not available in-person during the coordination visit attempts  
7  
8 will be made to contact them by telephone or through WhatsApp.  
9

10 Secondly, a 'study visit' will be made by a whole study team, consisting of a team leader  
11  
12 (usually non-clinical), three research nurses, and two drivers. Additionally, at the discretion  
13  
14 of the Municipality Administrator, Sub-Municipality Administrator and/or Head of Community  
15  
16 Health Centre, one or two local government representatives and/or one or two Community  
17  
18 Health Centre representatives may join the study visits. It is anticipated that these individuals  
19  
20 will primarily observe study procedures. Any involvement in participant recruitment, data  
21  
22 collection or sample collection will be directly supervised by the appropriate study team  
23  
24 member.  
25  
26

27  
28 **Navigation and maps:** Selected households will be identified using electronic tablets which  
29  
30 will have GPS capability and Google Earth® software installed. Keyhole Markup Language  
31  
32 (KML) files with GPS coordinates for all selected households in each EA will be pre-loaded  
33  
34 onto the tablets, such that they can be used without mobile/internet connectivity. KML files  
35  
36 are generated in QGIS. Each household location is verified using a Google Satellite base  
37  
38 map. Study teams will also carry printed colour copies of bespoke maps for each EA, which  
39  
40 will show the location of households in relation to roads, paths, and landmarks. These will be  
41  
42 produced using ArcMap™ 10.4.1 and will include ESRI imagery base map, showing the  
43  
44 location of main roads and the selected households coded by letters. The standard  
45  
46 operating procedure (SOP) for location of households is shown in appendix 1.  
47  
48

49  
50 **Data collection:** Study teams will approach the household occupants and introduce  
51  
52 themselves. The occupants will be asked to identify an (acting) head-of-household. If this  
53  
54 individual is not available (or if no occupants are present), the study team will arrange to  
55  
56 return twice to the household, and at least once on a separate day until a head-of-household  
57  
58 is present.  
59  
60

1  
2  
3 Data will be collected using structured interview-questionnaires. Responses will be entered  
4 into electronic tablets which will have REDCap® installed. This is a secure web platform for  
5 building and managing online databases which allows offline data entry<sup>6</sup>. Questionnaires  
6 data will be uploaded to the REDCap® secure server hosted at Menzies School of Health  
7 Research, Charles Darwin University, Darwin, Australia.  
8  
9  
10  
11  
12

13  
14 Three bespoke data collection tools have been developed (see appendices 2-4):  
15

- 16  
17 - Household questionnaire. This will be completed first. Demographic data on all  
18 household occupants (whether they are present at the time or not), will be collected  
19 by interviewing the head-of-household.  
20  
21
- 22  
23 - Participant questionnaire. This will be completed if/when any household occupants  
24 agree to participate. Each will be assigned a unique identification number (participant  
25 ID number) and relevant demographic, clinical and vaccine-related data will be  
26 collected. Participants will not be asked to provide written documentation of vaccines  
27 received because a low proportion of participants in the recent vaccine coverage  
28 survey had retained this.<sup>1</sup>  
29  
30
- 31  
32 - Unable to complete questionnaire. This will only be completed if the household  
33 questionnaire cannot be completed (i.e. if a head-of-household was not present or  
34 not willing to provide demographic data after 3 household visits). The reason for non-  
35 completion will be recorded in free-text.  
36  
37  
38  
39  
40  
41  
42  
43  
44

45 **Sample collection and handling:** Research nurses with training and experience in adult  
46 and paediatric phlebotomy will collect primary blood samples using appropriate infection  
47 prevention control procedures and safe management of sharps. Participants >5 years of  
48 age will undergo venepuncture using either a standard hypodermic or a winged butterfly  
49 needle with a syringe attached. Venous blood will then be injected directly into a gel serum  
50 separator tube (SST). Participants between 1-5 years of age (and those who do not consent  
51 to venepuncture but provide consent for a finger prick) may undergo capillary blood sampling  
52 through finger prick technique, in which case drops of blood will be applied directly to a  
53  
54  
55  
56  
57  
58  
59  
60

1  
2  
3 paediatric gel SST. The method used will be determined on a case-by-case basis by the  
4 research nurse in the field. Table 3 shows sample volumes and collection techniques for  
5 participants in different age groups.  
6  
7  
8

9  
10 <Table 3 here>  
11

12  
13 Primary blood samples will be kept at ambient temperature out of direct sunlight and allowed  
14 to clot for a maximum of eight hours (i.e. one day of fieldwork). They will then undergo  
15 centrifugation at 1,500 RCF for ten minutes and the resulting separated serum samples will  
16 be kept at 4 degrees Celsius using a portable refrigerator with battery power backup. They  
17 will be transported to LNS within five days of sample collection and will undergo primary  
18 serological analysis within two weeks of sample collection.  
19  
20  
21  
22  
23  
24

25  
26 A secondary dried blood spot (DBS) sample will be created: For participants who undergo  
27 venepuncture, the last 300-500µL of venous blood in the syringe will be injected onto  
28 Whatman 903 filter paper marked with three 12mm diameter circles. For participants who  
29 undergo finger-prick, additional drops of capillary blood will be applied directly from the finger  
30 to the filter paper. Once the circles are saturated with blood (typically using 100-150µL blood  
31 for each circle), the filter paper will be dried at ambient temperature out of direct sunlight for  
32 four hours, then placed alongside a desiccant sachet into a plastic zip lock bag. The SOP for  
33 data and sample collection is shown in appendix 5.  
34  
35  
36  
37  
38  
39  
40  
41  
42

43  
44 **Sample analysis:** Primary (serum) samples from all participants will be tested at LNS for  
45 rubella IgG (quantitative; considered positive if >10 IU/mL), SARS-CoV-2 anti-spike IgG  
46 (qualitative), hepatitis B core antibody (HBcAb, qualitative) and hepatitis B surface antibody  
47 (HBsAb, quantitative, considered positive if >10 mIU/mL) using Ortho Clinic Diagnostics®  
48 chemiluminescent assays on the Vitros ECiQ® platform, and for measles IgG using the  
49 Eurimmun® ELISA assay (quantitative, positive if >120IU/L). For quantitative assays,  
50 serological cut-offs which have been most commonly shown to correlate with protection from  
51 infection and/or those which are conventionally used in serosurveys and/or assessment of  
52  
53  
54  
55  
56  
57  
58  
59  
60

1  
2  
3 immunity have been chosen.<sup>7-9</sup> Where data are somewhat conflicting, there is lack of  
4  
5 consensus supporting a correlate-of-protection, or considerable inter-assay variability in  
6  
7 quantitative determination has been observed, secondary (exploratory) analyses using  
8  
9 alternative cut-offs may also be undertaken (for example 200IU/L and/or 250IU/L for  
10  
11 measles IgG).<sup>3</sup>  
12

13  
14 Additionally, samples from participants residing in Dili Municipality (excluding Atauro) will be  
15  
16 tested for hepatitis B surface antigen (HBsAg, qualitative). This marker denotes active  
17  
18 hepatitis B infection which may have significant health implications and will therefore only be  
19  
20 tested in Dili municipality where there is a hepatology clinic in which participants can receive  
21  
22 further assessment and follow-up. Any samples which are positive for HBsAg will also be  
23  
24 tested for hepatitis B envelope antigen (HBeAg, qualitative) and hepatitis B envelope  
25  
26 antibody (HBeAb, qualitative) testing using Ortho Clinic Diagnostics chemiluminescent  
27  
28 assays on the Vitros ECiQ platform, and hepatitis B viral load (HBVL, quantitative) using the  
29  
30 Cepheid® assay on the GeneXpert platform. All testing will be carried out according to  
31  
32 manufacturers' instructions and cited serological cut-off values. For qualitative assays,  
33  
34 samples with borderline/indeterminate results will be considered negative, apart from HBsAg  
35  
36 where the test will be repeated and both results reviewed alongside other hepatitis B results  
37  
38 by an appropriately qualified clinical member of the research team who will decide whether  
39  
40 the participant should be referred to the hepatology clinic for repeat sampling and clinical  
41  
42 assessment.  
43  
44

45  
46 Assays have been chosen based on their previous performance in seroprevalence studies,  
47  
48 immediate availability for shipment to Timor-Leste, and local laboratory expertise in  
49  
50 operating these types of assays (with ongoing capacity building for serological testing in  
51  
52 LNS). The measles IgG assay is quantitative and calibrated against a World Health  
53  
54 Organisation (WHO) Standard (NIBSC, Anti-Measles serum, 3rd International Standard  
55  
56 97/648). It showed acceptable performance when assessed in a recent study of  
57  
58 concordance between commercially available assays (concordance for samples with  
59  
60



1  
2  
3 positive/negative status = 90%/100%)<sup>10</sup>. The rubella IgG assay is quantitative and calibrated  
4 against a Centers for Disease Control and Prevention (CDC) standard (Low Titer Rubella  
5 Standard) and a World Health Organization (WHO) standard (1st International Rubella IgG  
6 Standard). While concerns around standardisation of rubella IgG assays are noted<sup>11</sup>, this  
7 assay showed acceptable performance when assessed in a recent study of concordance  
8 between automated immunoassays (concordance for samples with negative/positive status  
9 = 90.6%/91.1%)<sup>12</sup>. The hepatitis B surface antibody assay is quantitative and showed high  
10 sensitivity (97.1%) and specificity (97.9%) when evaluated in a panel of sera from healthcare  
11 workers and patients<sup>13</sup>. The SARS-CoV-2 anti-spike IgG assay has high sensitivity (93.3%,  
12 >21 days post infection) and specificity (100%), which compares favourably to many other  
13 available immunoassays<sup>14</sup>, and has been used in several serological surveillance studies<sup>15–</sup>  
14  
15  
16  
17  
18  
19  
20  
21  
22  
23  
24  
25  
26  
27  
28  
29  
30  
31  
32  
33  
34  
35  
36  
37  
38  
39  
40  
41  
42  
43  
44  
45  
46  
47  
48  
49  
50  
51  
52  
53  
54  
55  
56  
57  
58  
59  
60

**Provision of results to participants:** The majority of testing in this study will be for antibodies against VPDs (either IgG or total antibody). Results will therefore only indicate whether an individual has been previously infected and/or vaccinated against each disease at some time in the past and will not provide information on current infection. While seronegative participants may be at risk of future infections (and may benefit from vaccination), individual notification of results and provision of vaccines to all seronegative study participants is not considered feasible in this large cross-sectional study. Instead, all participants will be advised of the benefits of routine vaccination and immunisation clinics in their area, as well as on any forthcoming SIAs which may occur as a result of this study.

In addition to antibody tests, serum from participants within Dili Municipality (excluding Atauro) will be tested for HBsAg. This marker denotes active hepatitis B infection which may have significant health implications and will therefore only be tested in Dili municipality where there is a hepatology clinic in which participants can be seen. Participants who test positive for HBsAg will be contacted by telephone to discuss their results and will be offered assessment including biochemical and radiological investigation of liver function and



1  
2  
3 consideration of antiviral treatment in-line with international clinical guidelines<sup>18</sup>. This  
4 approach has been successful and has been acceptable to participants in a smaller  
5 serological surveillance study including hepatitis B testing among healthcare workers in  
6 Timor-Leste<sup>19</sup>.  
7  
8  
9  
10

11  
12 **Sample storage:** Primary (serum) samples will be stored at -80 degrees Celsius and  
13 secondary (DBS) samples will be stored at 4 degrees Celsius at LNS for 10 years. These  
14 may undergo additional serological analyses to further investigate infectious disease sero-  
15 epidemiology in Timor-Leste and/or validating existing and novel serological assays for  
16 infectious diseases, pending successful funding application and appropriate ethical approval.  
17  
18  
19  
20  
21  
22

23 **Fieldworker training:** Field workers will undergo one week of formal in-person training in  
24 study procedures. Days 1-2 will be classroom based and will include sessions on 'the study  
25 protocol', 'field team composition' (structure, members, responsibilities), 'logistics,  
26 technology and map reading', 'recruitment and consent', and 'collection of data using  
27 interview questionnaires'. Days 3-5 will be practical and will include demonstrations and  
28 training in adult and paediatric phlebotomy and finger-prick techniques, infection prevention  
29 control procedures, and the use of personal protective equipment (PPE). These skills will be  
30 assessed formatively throughout the training and summatively using pre- and post- session  
31 assessments. Training will be delivered by PA, JF, NSSF and/or JY who are clinicians with  
32 experience of epidemiological and clinical research in Timor-Leste.  
33  
34  
35  
36  
37  
38  
39  
40  
41  
42  
43  
44

45 **Laboratory team training:** Laboratory training will occur in the Serology Department of  
46 LNS. Training will be delivered by PA and TO who have significant experience with ELISA  
47 and chemiluminescent techniques, including in Timor-Leste. The focus of training will be on  
48 assay verification and quality assurance, as well as procedures for sample processing,  
49 analysis and storage.  
50  
51  
52  
53  
54  
55

56 **Data storage and handling:** Field data will be stored in the REDCap® secure server hosted  
57 at Menzies School of Health Research, Charles Darwin University, Darwin, Australia, until  
58  
59  
60

1  
2  
3 analysis. Laboratory data (i.e. serology worksheets and results) will be stored on the  
4 password-protected LNS laboratory information system (SchuyLab®) until analysis.  
5

6  
7 Deidentified field and laboratory datasets will be downloaded and stored as password-  
8  
9 protected databases on computer(s) at Menzies School of Health Research, Timor-Leste  
10  
11 Office, Dili, Timor-Leste, where they will be linked using participant ID numbers and  
12  
13 analysed. Only named investigators who are working directly on this project will have  
14  
15 access to data.  
16

17  
18 **Statistical analysis plan:** Primary data analysis will occur at the end of the study, once all  
19  
20 fieldwork is complete and all samples have been analysed. Interim analyses may also occur  
21  
22 upon reasonable request from the Timor-Leste MoH or other partner organisation. As a  
23  
24 multi-stage sampling survey design will be used to select participants, sampling weights will  
25  
26 be calculated at each stage. These weights will reflect a participant's inverse probability of  
27  
28 selection at a particular stage, be it at the EA level, the household level or the householder  
29  
30 level. Furthermore, these weights will subject to both non-response adjustment and finite  
31  
32 population correction. Measures of prevalence will be age-standardised using the standard  
33  
34 population for Asia given by the International Network for the Demographic PNGIMR 2018,  
35  
36 Papua New Guinea MIS 2016-2017.<sup>20</sup> To account for this design, the 'svy' data commands  
37  
38 in Stata (version 16, StataCorp, College Station, TX, USA) will be used for ally analyses.  
39  
40 Characteristics of participants will be summarised using weighted descriptive statistics.  
41  
42 Frequencies and proportions will be used to describe categorical distributions, whilst means  
43  
44 and standard deviations will be used to describe continuous variables. In the presence of  
45  
46 non-normality, medians and interquartile ranges will be reported. Univariable and  
47  
48 multivariable binary logistic regression will be undertaken to model age, the independent  
49  
50 variables of primary interest with the five VPD outcomes. In addition to this variable, other  
51  
52 variables known to be risk factors of VPD, such as sex and travel history, will be subjected to  
53  
54 a manual backward stepwise procedure. Variables with a p-value  $\geq 0.20$  will not be retained.  
55  
56 The Hosmer-Lemeshow test will be used to test the goodness of fit of each multivariable  
57  
58  
59  
60

1  
2  
3 model. A p-value < 0.05 will be considered statistically significant with Odds Ratios (OR),  
4  
5 95% confidence intervals (CI) and p-values calculated for age and sex.  
6  
7  
8  
9

## 10 **ETHICS AND DISSEMINATION**

11  
12  
13 **Informed consent:** Each prospective participant will receive a participant information sheet  
14 which will be printed in English and Tetum. They will also be provided with a verbal  
15 explanation of the study rationale and procedures. This will include potential risks and  
16 benefits of sample collection, specific tests which their sample will undergo, the fact that they  
17 will not receive notification of any results (with the exception of a positive HBsAg, tested in  
18 Dili Municipality only) and the possibility that their sample will undergo additional analyses  
19 for evidence of communicable diseases during the next 10 years. They will be given up to 30  
20 minutes to ask questions and decide whether they wish to participate, and will then provide  
21 informed, written consent by signing a consent form. For individuals under 16 years of age,  
22 verbal assent will be sought, in addition to written consent from their parent or guardian. This  
23 study has received ethical approval from the Research Ethics and Technical Committee of  
24 the Instituto Nacional da Saúde, Timor-Leste (Reference: 875 MS-INS/DGE/IX/2021) and the  
25 Human Research Ethics Committee of the Northern Territory Department of Health and  
26 Menzies School of Health Research, Australia (Reference: 2021-4064).  
27  
28  
29  
30  
31  
32  
33  
34  
35  
36  
37  
38  
39  
40  
41  
42  
43

44 **Protocol amendments:** Any modifications to the protocol which may impact on the conduct  
45 of the study will be documented in a formal protocol amendment and approved by both  
46 Research Ethics Committees prior to implementation of the changes. The Research Ethics  
47 Committees will also be notified of any minor corrections/clarifications or administrative  
48 changes to the protocol, which will be documented in a protocol amendment letter.  
49  
50  
51  
52  
53

54 **Adverse events:** Data on adverse events will be collected throughout the study, with  
55 participants (or their parent/guardian) being informed of the risks of phlebotomy (including  
56 bruising, bleeding and infection), how to recognise these, and how to contact the study team  
57  
58  
59  
60

1  
2  
3 if they occur. Adverse events will be reported to the Principal Investigator. In cases where  
4  
5 infection or any other serious adverse event has occurred, the Principle Investigator will  
6  
7 conduct a review of the study visit and decide whether any phlebotomy retraining or change  
8  
9 in practice is required and/or whether recruitment to the study should be paused.  
10

11  
12 **Strengths and limitations:** This project will produce accurate, nationally representative  
13  
14 seroprevalence data for multiple VPDs and relevant age-groups, which has not been  
15  
16 achieved in Timor-Leste previously. It has been co-designed by investigators at Menzies  
17  
18 School of Health Research (Timor-Leste Office), the National Centre for Immunisation  
19  
20 Research and Surveillance (Australia), the MoH (Timor-Leste), LNS (Timor-Leste), and the  
21  
22 WHO (Timor-Leste Office) according to local research and public health priorities. This will  
23  
24 allow immediate translation of findings into public health policy (including potentially changes  
25  
26 to routine immunisation service delivery and/or plans for SIAs). Additionally, the survey will  
27  
28 derive a national asset of serum and dried blood spot (DBS) samples which can be used for  
29  
30 further investigation of infectious disease sero-epidemiology in Timor-Leste and/or validating  
31  
32 existing and novel serological assays for infectious diseases.<sup>21–25</sup> Engagement with local  
33  
34 administrative and health leaders and maximisation of participant choice and welfare have  
35  
36 been central to the design, including ensuring all individuals diagnosed with active hepatitis  
37  
38 B during the study have access to appropriate further investigation and follow-up.  
39

40  
41  
42 Risks and limitations include the ongoing global outbreak of SARS-CoV-2 (which may  
43  
44 delay/prohibit study visits), disruption of supply of field and laboratory consumables to Timor-  
45  
46 Leste (which may delay/increase the cost of laboratory analysis), natural disasters such as  
47  
48 flooding, and potential unwillingness of individuals to participate in provision of data and/or  
49  
50 samples (which may affect recruitment, potentially disproportionately among children).  
51

52  
53 **Dissemination / knowledge transition plan:** After each interim analyses, results will be  
54  
55 shared with Timor-Leste MoH partners in the form of an oral presentation and in a written  
56  
57 report. Following completion of the study, results will be shared with Timor-Leste MoH, other  
58  
59 partner organisations, and local administrative and health leaders for EAs where the study  
60

1  
2  
3 took place (Municipality Administrators, Directors of Municipality Health Services, Sub-  
4 Municipality Administrators, Heads of Community Health Centres, Chiefs of Sucos, Chief of  
5 Aldeia), in the form of a written report. Results will also be submitted for publication in peer-  
6 reviewed journals and presented at relevant international conferences.  
7  
8  
9  
10  
11  
12  
13  
14

## 15 **CONCLUSION**

16  
17  
18 Historic disruption in health infrastructure including to the delivery of vaccines combined with  
19 data from a recent vaccine coverage survey suggests there are likely significant immunity  
20 gaps to VPDs and high risk of outbreaks in Timor-Leste. Targeted seroprevalence studies  
21 including healthcare workers in Timor-Leste have identified lower than expected  
22 seropositivity against measles, high seropositivity against SARS-CoV-2 and a high  
23 prevalence of active hepatitis B infection.<sup>19,26</sup> This study will fill a crucial gap in  
24 understanding of national population immunity against VPDs and will guide routine  
25 immunisation service delivery, plans for SIAs, and an ongoing programme of vaccine  
26 research in Timor-Leste.  
27  
28  
29  
30  
31  
32  
33  
34  
35  
36  
37  
38  
39

## 40 **AUTHOR CONTRIBUTIONS**

41  
42  
43 PA, SLS, NM, SA, NS, F, FNM, NSSF, KM, JY and JRF conceived the study. PA, SLS, NM,  
44 MYT, SA, ADKD, NS, LA, CF, FNM, CAG reviewed existing literature and performed  
45 situation analysis. PA, MYT, SA, VS, LA, CAG, ICB determined the fieldwork procedures  
46 and designed data collection tools. PA, NG, TO, NS, ES, LA, ICB determined laboratory  
47 procedures. PA, MD, ADKD, NS, NSSF drafted the data and statistical analysis plan. NM,  
48 MYT, SA, NS, CF, FNM, CAG planned community engagement, obtained ethical approval  
49 and lead other regulatory aspects of the study. All authors reviewed and commented on the  
50 final manuscript.  
51  
52  
53  
54  
55  
56  
57  
58  
59  
60

## COMPETING INTERESTS

All authors declare no competing interests for this study.

## FUNDING STATEMENT

This work was supported by the Department for Foreign Affairs and Trade, Australian Government (Complex Grant Agreement Number 75889).

## REFERENCES

- 1 WHO. Timor-Leste: WHO and UNICEF estimates of immunization coverage : 2019 revision. 2021; : 1–18.
- 2 Plotkin SA. Vaccines: correlates of vaccine-induced immunity. *Clin Infect Dis* 2008; **47**: 401–9.
- 3 Bolotin S, Hughes SL, Gul N, *et al*. What Is the Evidence to Support a Correlate of Protection for Measles? A Systematic Review. *J Infect Dis* 2020; **221**: 1576–83.
- 4 Plotkin SA. Correlates of protection induced by vaccination. *Clin Vaccine Immunol* 2010; **17**: 1055–65.
- 5 Moss WJ. Measles. *Lancet* 2017; **390**: 2490–502.
- 6 REDCap. <https://www.project-redcap.org/> (accessed Aug 25, 2022).
- 7 World Health Organisation. WHO Immunological Basis for Immunization Series Module 7: Measles. In: Immunological basis for immunization series. 2020: 18.
- 8 World Health Organization. The Immunological Basis for Immunization Series Module 11: Rubella. 2008

1  
2  
3 [https://apps.who.int/iris/bitstream/handle/10665/43922/9789241596848\\_eng.pdf;jsessionid=B50F1DE9E021388B2DBB9C7A8B76F6E5?sequence=1](https://apps.who.int/iris/bitstream/handle/10665/43922/9789241596848_eng.pdf;jsessionid=B50F1DE9E021388B2DBB9C7A8B76F6E5?sequence=1) (accessed Sept 13,  
4  
5  
6  
7 2022).

- 9 World Health Organization. The Immunological Basis for Immunization Series Module  
10 22: Hepatitis B. 2011.
- 11  
12  
13  
14  
15 10 Tischer A, Andrews N, Kafatos G, *et al*. Standardization of measles, mumps and  
16 rubella assays to enable comparisons of seroprevalence data across 21 European  
17 countries and Australia. *Epidemiol Infect* 2007; **135**: 787–98.
- 18  
19  
20  
21  
22 11 Dimech W, Grangeot-Keros L, Vauloup-Fellous C. Standardization of Assays That  
23 Detect Anti-Rubella Virus IgG Antibodies. 2015. DOI:10.1128/CMR.00045-15.
- 24  
25  
26  
27 12 Dimech W, Arachchi N, Cai J, Sahin T, Wilson K. Investigation into Low-Level Anti-  
28 Rubella Virus IgG Results Reported by Commercial Immunoassays. 2013.  
29 DOI:10.1128/CVI.00603-12.
- 30  
31  
32  
33  
34 13 Huzly D, Schenk T, Jilg W, Neumann-Haefelin D. Comparison of nine commercially  
35 available assays for quantification of antibody response to hepatitis B virus surface  
36 antigen. *J Clin Microbiol* 2008; **46**: 1298–306.
- 37  
38  
39  
40  
41 14 Harritshøj LH, Gybel-Brask M, Afzal S, *et al*. Comparison of 16 Serological SARS-  
42 CoV-2 Immunoassays in 16 Clinical Laboratories. *J Clin Microbiol jcm.asm.org* 2021;  
43 **59**: 2596–616.
- 44  
45  
46  
47  
48 15 Santarelli A, Lalitsasivimol D, Bartholomew N, *et al*. The seroprevalence of sars-cov-2  
49 in a rural southwest community. *J Am Osteopath Assoc* 2021; **121**: 199–210.
- 50  
51  
52  
53 16 Ng DL, Goldgof GM, Shy BR, *et al*. SARS-CoV-2 seroprevalence and neutralizing  
54 activity in donor and patient blood. *Nat Commun* 2020; **11**. DOI:10.1038/s41467-020-  
55 18468-8.
- 56  
57  
58  
59 17 Jin DK, Nesbitt DJ, Yang J, *et al*. Seroprevalence of anti-SARS-CoV-2 antibodies in a  
60



- 1  
2  
3 cohort of New York City metro blood donors using multiple SARS-CoV-2 serological  
4 assays: Implications for controlling the epidemic and 'Reopening'. *PLoS One* 2021;  
5  
6 **16**: e0250319.  
7  
8  
9
- 10 18 Lampertico P, Agarwal K, Berg T, *et al.* EASL 2017 Clinical Practice Guidelines on the  
11 management of hepatitis B virus infection. *J Hepatol* 2017; **67**: 370–98.  
12  
13  
14
- 15 19 Gusmao C, Tanesi MY, Gomes N, *et al.* Seroprevalence and Prevention of Hepatitis  
16 B, Measles, and Rubella Among Healthcare Workers in Dili, Timor-Leste. *SSRN*  
17 *Electron J* 2022. DOI:10.2139/SSRN.4186798.  
18  
19  
20
- 21 20 Sankoh O, Sharrow D, Herbst K, *et al.* The INDEPTH standard population for low-  
22 and middle-income countries, 2013. *Glob Health Action* 2014; **7**.  
23  
24  
25  
26  
27  
28  
29
- 30 21 Arkell P, Angelina J, do Carmo Vieira A, *et al.* Integrated serological surveillance of  
31 acute febrile illness in the context of a lymphatic filariasis survey in Timor-Leste: a  
32 pilot study using dried blood spots. *Trans R Soc Trop Med Hyg* 2021; published online  
33  
34  
35  
36  
37  
38
- 39 22 Basile AJ, Horiuchi K, Panella AJ, *et al.* Multiplex microsphere immunoassays for the  
40 detection of IgM and IgG to arboviral diseases. *PLoS One* 2013; **8**.  
41  
42  
43  
44  
45
- 46 23 Tyson J, Tsai WY, Tsai JJ, *et al.* A high-throughput and multiplex microsphere  
47 immunoassay based on non-structural protein 1 can discriminate three flavivirus  
48 infections. *PLoS Negl Trop Dis* 2019; **13**. DOI:10.1371/JOURNAL.PNTD.0007649.  
49  
50  
51
- 52 24 Fornace KM, Senyonjo L, Martin DL, *et al.* Characterising spatial patterns of  
53 neglected tropical disease transmission using integrated sero-surveillance in Northern  
54  
55  
56  
57  
58
- 59 25 Tetteh KKA, Wu L, Hall T, *et al.* Optimisation and standardisation of a multiplex  
60



1  
2  
3 immunoassay of diverse Plasmodium falciparum antigens to assess changes in  
4 malaria transmission using sero-epidemiology. *Wellcome open Res* 2020; **4**.  
5  
6 DOI:10.12688/WELLCOMEOPENRES.14950.2.  
7  
8  
9

- 10 26 Arkell P, Gusmao C, Sheridan SL, *et al*. Serological surveillance of healthcare  
11 workers to evaluate natural infection- and vaccine-derived immunity to SARS-CoV-2  
12 during an outbreak in Dili, Timor-Leste. *Int J Infect Dis* 2022; **119**: 80–6.  
13  
14  
15  
16  
17  
18  
19  
20  
21  
22  
23  
24  
25  
26  
27  
28  
29  
30  
31  
32  
33  
34  
35  
36  
37  
38  
39  
40  
41  
42  
43  
44  
45  
46  
47  
48  
49  
50  
51  
52  
53  
54  
55  
56  
57  
58  
59  
60

For peer review only

1  
2  
3  
4  
5  
6  
7  
8  
9  
10  
11  
12  
13  
14  
15  
16  
17  
18  
19  
20  
21  
22  
23  
24  
25  
26  
27  
28  
29  
30  
31  
32  
33  
34  
35  
36  
37  
38  
39  
40  
41  
42  
43  
44  
45  
46  
47  
48  
49  
50  
51  
52  
53  
54  
55  
56  
57  
58  
59  
60

For peer review only

**Table 1: Routine Timor-Leste vaccination schedule in 2022 and estimated coverage in 2018**

| Vaccine        | Recommended age of administration         | Introduced                            | Crude estimated coverage (2018 national vaccine coverage survey) (95%CI)* |
|----------------|-------------------------------------------|---------------------------------------|---------------------------------------------------------------------------|
| BCG            | At birth                                  | Pre 1999                              | 94.7% (91.7%-97.0%)                                                       |
| HepB0          |                                           | 2016                                  | 66.2% (58.5%-73.0%)                                                       |
| bOPV0          |                                           | 2016                                  | 80.4% (74.0%-86.0%)                                                       |
| DTwP-Hib-HepB1 | 6 weeks                                   | 2007                                  | 91.8% (87.8%-95.0%)                                                       |
| bOPV1          |                                           | 201                                   | 91.8% (87.8%-95.0%)                                                       |
| RV1            |                                           | 2019                                  | Not part of routine vaccination in 2018                                   |
| DTwP-Hib-HepB2 | 10 weeks                                  | 2007                                  | 87.4% (82.6%-91.0%)                                                       |
| bOPV2          |                                           | 2016                                  | 87.8% (83.0%-91.0%)                                                       |
| RV2            |                                           | 2019                                  | Not part of routine vaccination in 2018                                   |
| DTwP-Hib-HepB3 | 14 weeks                                  | 2007                                  | 83.3% (78.0%-87.0%)                                                       |
| bOPV3          |                                           | 2016                                  | 83.3% (78.0%-87.0%)                                                       |
| RV3            |                                           | 2019                                  | Not part of routine vaccination in 2018                                   |
| IPV            |                                           | 2016                                  | 80.6% (74.1%-86.0%)                                                       |
| MR1            | 9 months                                  | 2016                                  | 77.3% (71.5%-82.0%)                                                       |
| DTwP4          | 18 months                                 | 2016                                  | 54.8% (46.5%-63.0%)                                                       |
| MR2            |                                           | 2016                                  | 54.4% (46.1%-62.0%)                                                       |
| DT             | 6 year or school entry                    | 2016                                  | Not measured in 2018 survey                                               |
| TT1-5          | Unimmunised pregnant women                | Pre 1999                              | 68.2% (62.4%-74.0%)                                                       |
| SARS-CoV-2     | Adults and children above 12 years of age | Adults: Apr 2021<br>Children Oct 2021 | Not part of routine vaccination in 2018                                   |

Abbreviations: BCG = bacillus Calmette-Guérin; HepB = hepatitis B; bOPV0 = bivalent oral polio vaccine; DTwP-Hib-HepB = diphtheria, tetanus, pertussis, hepatitis B and Haemophilus influenzae type B; RV = rotavirus vaccine; IPV = inactivated poliovirus vaccine; MR = measles and rubella vaccine; DT - diphtheria and tetanus vaccine; TT - tetanus toxoid vaccine.

1  
2  
3 \*crude coverage is defined as all doses, whether valid or not, by any documented evidence or verbal history at  
4 the time of the survey.  
5  
6  
7  
8  
9  
10  
11  
12  
13  
14  
15  
16  
17  
18  
19  
20  
21  
22  
23  
24  
25  
26  
27  
28  
29  
30  
31  
32  
33  
34  
35  
36  
37  
38  
39  
40  
41  
42  
43  
44  
45  
46  
47  
48  
49  
50  
51  
52  
53  
54  
55  
56  
57  
58  
59  
60

For peer review only

**Table 2: Parameters for the cluster survey sample size calculation (for national age-stratified seroprevalence estimates for all VPDs)**

| Parameter                                                          | Value used |
|--------------------------------------------------------------------|------------|
| Number of strata (age groups)                                      | 5          |
| Expected seroprevalence* (p)                                       | 50%        |
| Desired precision level (d)                                        | 6%         |
| Alpha error                                                        | 5%         |
| Z value                                                            | 1.96       |
| Estimated sample size (simple random)                              | 280        |
| Target number of respondents per cluster                           | 10         |
| Intra-cluster correlation coefficient                              | 0.333      |
| Coefficient of variation                                           | 0.3        |
| Design effect                                                      | 4          |
| Non-response rate                                                  | 15%        |
| Sample size per age strata <sup>†</sup> (excluding non-responders) | 1120       |
| Total sample size (excluding non-responders)                       | 5600       |

\*There are no nationally representative historic data to indicate VPD seroprevalence in Timor-Leste. Therefore, expected seroprevalence has been set at 50% for all VPDs, to ensure the study is sufficiently powered

<sup>†</sup>Age strata are: 1-4, 5-14, 15-24, 25-40, and 40+ years

**Table 3: Sample volumes and collection techniques for primary sample collection by age group**

| Age group  | Method of blood collection | Equipment                                                                      | Collection container    | Target sample volume |
|------------|----------------------------|--------------------------------------------------------------------------------|-------------------------|----------------------|
| 1-5 years  | Venepuncture*              | 23G butterfly needle, venous blood aspirated into 5ml syringe                  | 5ml SST tube            | 5ml                  |
|            | Finger prick*              | Lancet, capillary blood drops transferred directly into collection tube        | 2ml paediatric SST tube | 2ml                  |
| 6-15 years | Venepuncture               | 21-23G needle or 23G butterfly needle, venous blood aspirated into 5ml syringe | 5ml SST tube            | 5ml                  |
| Adults     | Venepuncture               | 21-23G needle, venous blood aspirated into 10ml syringe                        | 2x 5ml SST tube         | 10ml                 |

Abbreviations: SST = serum separator tube

\*Determined in field by phlebotomist on case-by-case basis

**APPENDICIES**

Appendix 1: Standard operating procedure for location of households

Appendix 2: Household questionnaire

Appendix 3: Participant questionnaire

Appendix 4: Did not complete questionnaire

Appendix 5: Standard operating procedure for data and sample collection

**FIGURE LEGENDS**

Figure 1: Map of Timor-Leste showing enumeration areas (EAs) within municipalities

**ACKNOWLEDGMENTS**

Mr Trevor Clifford

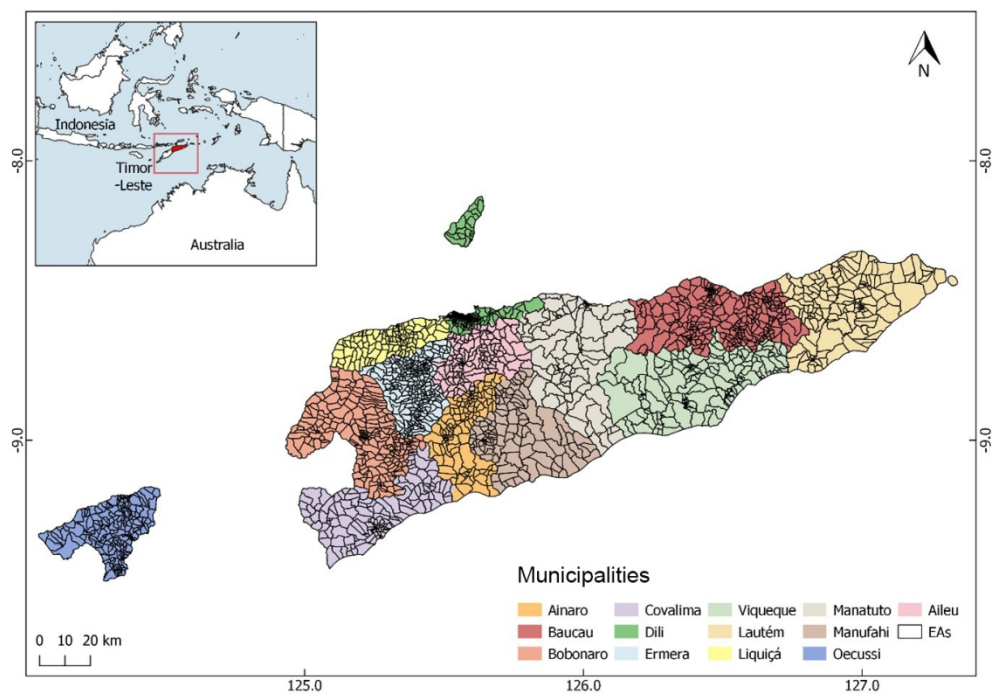

Figure 1: Map of Timor-Leste showing enumeration areas (EAs) within municipalities

159x112mm (220 x 220 DPI)



### VASINA fieldwork SOP – location of households

1. **Navigate to household using GPS device and printed maps**
  - Make sure you identify the exact house (do not accept another household nearby)
2. **If at least one adult household member is present, move to *Data and Sample Collection SOP***
3. **If the household was found, but there are no household members present (or if one or more household members are missing):**
  - Arrange and conduct a second and third visit. At least one of these should be on a different day.
  - If there are no household members present on all three visits, complete the '*Unable to Complete Questionnaire*' on RedCap
  - Do not find another household to replace this one
4. **If the household was found, but it looks derelict**
  - Fill out the '*Unable to Complete Questionnaire*' on RedCap
  - Choose the nearest occupied house and offer study participation to these occupants instead. If there are two equidistant houses, choose the one on the Left. When collecting data for the new household, add "B" to the end of the household number (e.g. "12345B")
5. **If the household cannot be found**
  - Fill out the '*Unable to Complete Questionnaire*' on RedCap
  - Make sure you enter the reason that the household cannot be found
  - Do not find another household to replace this one

# Household Questionnaire

Record ID

Household number

Númeru Uma-kain

How many people currently live in this household?

Ema nain hira mak agora dadauk hela iha uma-kain ida-ne'e?

1

2

3

4

5

6

7

8

9

10

11

12

13

14

15

16

17

18

19

20

(If the household has more than 20 mebers, fill out a second Household Questionnaire / Karik iha uma-kain ida nia membru barak liu ema 20, preenxe fali iha kuestionariu uma-kain segundu)

Gender of household member 1

Male / Mane

Female / Feto

Jeneru membru uma-kain 1

Age of household member 1

Idade membru uma-kain 1

(If unsure, please estimate age (to the nearest 10 years))

Adult or child?

Adult

Child

(Only fill this out if age cannot be estimated)

Study ID number of household member 1

Númeru ID estudu nian ba membru uma-kain 1

( Only fill if he/she chooses to participate / Preenxe deit kuandu nia hili atu partisipa)

Gender of household member 2

Male / Mane

Female / Feto

Jeneru membru uma-kain 2

|    |                                            |                                                                                            |
|----|--------------------------------------------|--------------------------------------------------------------------------------------------|
| 1  | Age of household member 2                  |                                                                                            |
| 2  |                                            |                                                                                            |
| 3  | Idade membru uma-kain 2                    | (If unsure, please estimate age (to the nearest 10 years))                                 |
| 4  |                                            |                                                                                            |
| 5  |                                            |                                                                                            |
| 6  | Adult or child?                            | <input type="radio"/> Adult                                                                |
| 7  |                                            | <input type="radio"/> Child                                                                |
| 8  |                                            | (Only fill this out if age cannot be estimated)                                            |
| 9  |                                            |                                                                                            |
| 10 |                                            |                                                                                            |
| 11 | Study ID number of household member 2      |                                                                                            |
| 12 |                                            |                                                                                            |
| 13 | Númeru ID estudu nian ba membru uma-kain 2 | ( Only fill if he/she chooses to participate / Preenxe deit kuandu nia hili atu partisipa) |
| 14 |                                            |                                                                                            |
| 15 |                                            |                                                                                            |
| 16 | Gender of household member 3               | <input type="radio"/> Male / Mane                                                          |
| 17 |                                            | <input type="radio"/> Female / Feto                                                        |
| 18 | Jeneru membru uma-kain 3                   |                                                                                            |
| 19 |                                            |                                                                                            |
| 20 |                                            |                                                                                            |
| 21 | Age of household member 3                  |                                                                                            |
| 22 |                                            |                                                                                            |
| 23 | Idade membru uma-kain 3                    | (If unsure, please estimate age (to the nearest 10 years))                                 |
| 24 |                                            |                                                                                            |
| 25 |                                            |                                                                                            |
| 26 | Adult or child?                            | <input type="radio"/> Adult                                                                |
| 27 |                                            | <input type="radio"/> Child                                                                |
| 28 |                                            | (Only fill this out if age cannot be estimated)                                            |
| 29 |                                            |                                                                                            |
| 30 |                                            |                                                                                            |
| 31 | Study ID number of household member 3      |                                                                                            |
| 32 |                                            |                                                                                            |
| 33 | Númeru ID estudu nian ba membru uma-kain 3 | ( Only fill if he/she chooses to participate / Preenxe deit kuandu nia hili atu partisipa) |
| 34 |                                            |                                                                                            |
| 35 |                                            |                                                                                            |
| 36 | Gender of household member 4               | <input type="radio"/> Male / Mane                                                          |
| 37 |                                            | <input type="radio"/> Female / Feto                                                        |
| 38 | Jeneru membru uma-kain 4                   |                                                                                            |
| 39 |                                            |                                                                                            |
| 40 |                                            |                                                                                            |
| 41 | Age of household member 4                  |                                                                                            |
| 42 |                                            |                                                                                            |
| 43 | Idade membru uma-kain 4                    | (If unsure, please estimate age (to the nearest 10 years))                                 |
| 44 |                                            |                                                                                            |
| 45 |                                            |                                                                                            |
| 46 | Adult or child?                            | <input type="radio"/> Adult                                                                |
| 47 |                                            | <input type="radio"/> Child                                                                |
| 48 |                                            | (Only fill this out if age cannot be estimated)                                            |
| 49 |                                            |                                                                                            |
| 50 |                                            |                                                                                            |
| 51 | Study ID number of household member 4      |                                                                                            |
| 52 |                                            |                                                                                            |
| 53 | Númeru ID estudu nian ba membru uma-kain 4 | (Only fill if he/she chooses to participate / Preenxe deit kuandu nia hili atu partisipa)  |
| 54 |                                            |                                                                                            |
| 55 |                                            |                                                                                            |
| 56 | Gender of household member 5               | <input type="radio"/> Male / Mane                                                          |
| 57 |                                            | <input type="radio"/> Female / Feto                                                        |
| 58 | Jeneru membru uma-kain 5                   |                                                                                            |
| 59 |                                            |                                                                                            |
| 60 |                                            |                                                                                            |
| 61 | Age of household member 5                  |                                                                                            |
| 62 |                                            |                                                                                            |
| 63 | Idade membru uma-kain 5                    | (If unsure, please estimate age (to the nearest 10 years))                                 |

|    |                                            |                                                                                           |
|----|--------------------------------------------|-------------------------------------------------------------------------------------------|
| 1  | Adult or child?                            | <input type="radio"/> Adult                                                               |
| 2  |                                            | <input type="radio"/> Child                                                               |
| 3  |                                            | (Only fill this out if age cannot be estimated)                                           |
| 4  |                                            |                                                                                           |
| 5  | Study ID number of household member 5      |                                                                                           |
| 6  |                                            |                                                                                           |
| 7  | Númeru ID estudu nian ba membru uma-kain 5 | (Only fill if he/she chooses to participate / Preenxe deit kuandu nia hili atu partisipa) |
| 8  |                                            |                                                                                           |
| 9  |                                            |                                                                                           |
| 10 |                                            |                                                                                           |
| 11 | Gender of household member 6               | <input type="radio"/> Male / Mane                                                         |
| 12 |                                            | <input type="radio"/> Female / Feto                                                       |
| 13 | Jeneru membru uma-kain 6                   |                                                                                           |
| 14 |                                            |                                                                                           |
| 15 | Age of household member 6                  |                                                                                           |
| 16 |                                            |                                                                                           |
| 17 | Idade membru uma-kain 6                    | (If unsure, please estimate age (to the nearest 10 years))                                |
| 18 |                                            |                                                                                           |
| 19 |                                            |                                                                                           |
| 20 | Adult or child?                            | <input type="radio"/> Adult                                                               |
| 21 |                                            | <input type="radio"/> Child                                                               |
| 22 |                                            | (Only fill this out if age cannot be estimated)                                           |
| 23 |                                            |                                                                                           |
| 24 | Study ID number of household member 6      |                                                                                           |
| 25 |                                            |                                                                                           |
| 26 | Númeru ID estudu nian ba membru uma-kain 6 | (Only fill if he/she chooses to participate / Preenxe deit kuandu nia hili atu partisipa) |
| 27 |                                            |                                                                                           |
| 28 |                                            |                                                                                           |
| 29 |                                            |                                                                                           |
| 30 | Gender of household member 7               | <input type="radio"/> Male / Mane                                                         |
| 31 |                                            | <input type="radio"/> Female / Feto                                                       |
| 32 | Jeneru membru uma-kain 7                   |                                                                                           |
| 33 |                                            |                                                                                           |
| 34 | Age of household member 7                  |                                                                                           |
| 35 |                                            |                                                                                           |
| 36 | Idade membru uma-kain 7                    | (If unsure, please estimate age (to the nearest 10 years))                                |
| 37 |                                            |                                                                                           |
| 38 |                                            |                                                                                           |
| 39 | Adult or child?                            | <input type="radio"/> Adult                                                               |
| 40 |                                            | <input type="radio"/> Child                                                               |
| 41 |                                            | (Only fill this out if age cannot be estimated)                                           |
| 42 |                                            |                                                                                           |
| 43 | Study ID number of household member 7      |                                                                                           |
| 44 |                                            |                                                                                           |
| 45 | Númeru ID estudu nian ba membru uma-kain 7 | (Only fill if he/she chooses to participate / Preenxe deit kuandu nia hili atu partisipa) |
| 46 |                                            |                                                                                           |
| 47 |                                            |                                                                                           |
| 48 |                                            |                                                                                           |
| 49 | Gender of household member 8               | <input type="radio"/> Male / Mane                                                         |
| 50 |                                            | <input type="radio"/> Female / Feto                                                       |
| 51 | Jeneru membru uma-kain 8                   |                                                                                           |
| 52 |                                            |                                                                                           |
| 53 | Age of household member 8                  |                                                                                           |
| 54 |                                            |                                                                                           |
| 55 | Idade membru uma-kain 8                    | (If unsure, please estimate age (to the nearest 10 years))                                |
| 56 |                                            |                                                                                           |
| 57 |                                            |                                                                                           |
| 58 | Adult or child?                            | <input type="radio"/> Adult                                                               |
| 59 |                                            | <input type="radio"/> Child                                                               |
| 60 |                                            | (Only fill this out if age cannot be estimated)                                           |

---

1 Study ID number of household member 8

2

3 Númeru ID estudu nian ba membru uma-kain 8 (Only fill if he/she chooses to participate /  
4 Preenxe deit kuandu nia hili atu partisipa)

---

6 Gender of household member 9  Male / Mane  
7  Female / Feto

8 Jeneru membru uma-kain 9

---

10 Age of household member 9

11 Idade membru uma-kain 9 (If unsure, please estimate age (to the nearest 10  
12 years))

---

16 Adult or child?  Adult  
17  Child  
18 (Only fill this out if age cannot be estimated)

---

20 Study ID number of household member 9

21

22 Númeru ID estudu nian ba membru uma-kain 9 (Only fill if he/she chooses to participate /  
23 Preenxe deit kuandu nia hili atu partisipa)

---

25 Gender of household member 10  Male / Mane  
26  Female / Feto

27 Jeneru membru uma-kain 10

---

29 Age of household member 10

30 Idade membru uma-kain 10 (If unsure, please estimate age (to the nearest 10  
31 years))

---

35 Adult or child?  Adult  
36  Child  
37 (Only fill this out if age cannot be estimated)

---

39 Study ID number of household member 10

40

41 Númeru ID estudu nian ba membru uma-kain 10 (Only fill if he/she chooses to participate /  
42 Preenxe deit kuandu nia hili atu partisipa)

---

44 Gender of household member 11  Male / Mane  
45  Female / Feto

46 Jeneru membru uma-kain 11

---

48 Age of household member 11

49 Idade membru uma-kain 11 (If unsure, please estimate age (to the nearest 10  
50 years))

---

54 Adult or child?  Adult  
55  Child  
56 (Only fill this out if age cannot be estimated)

---

58 Study ID number of household member 11

59

60 Númeru ID estudu nian ba membru uma-kain 11 (Only fill if he/she chooses to participate /  
Preenxe deit kuandu nia hili atu partisipa)

|    |                                             |                                                                                           |
|----|---------------------------------------------|-------------------------------------------------------------------------------------------|
| 1  | Gender of household member 12               | <input type="radio"/> Male / Mane                                                         |
| 2  |                                             | <input type="radio"/> Female / Feto                                                       |
| 3  | Jeneru membru uma-kain 12                   |                                                                                           |
| 4  |                                             |                                                                                           |
| 5  | Age of household member 12                  |                                                                                           |
| 6  |                                             |                                                                                           |
| 7  | Idade membru uma-kain 12                    | (If unsure, please estimate age (to the nearest 10 years))                                |
| 8  |                                             |                                                                                           |
| 9  |                                             |                                                                                           |
| 10 | Adult or child?                             | <input type="radio"/> Adult                                                               |
| 11 |                                             | <input type="radio"/> Child                                                               |
| 12 |                                             | (Only fill this out if age cannot be estimated)                                           |
| 13 |                                             |                                                                                           |
| 14 |                                             |                                                                                           |
| 15 | Study ID number of household member 12      |                                                                                           |
| 16 |                                             |                                                                                           |
| 17 | Númeru ID estudu nian ba membru uma-kain 12 | (Only fill if he/she chooses to participate / Preenxe deit kuandu nia hili atu partisipa) |
| 18 |                                             |                                                                                           |
| 19 |                                             |                                                                                           |
| 20 | Gender of household member 13               | <input type="radio"/> Male / Mane                                                         |
| 21 |                                             | <input type="radio"/> Female / Feto                                                       |
| 22 | Jeneru membru uma-kain 13                   |                                                                                           |
| 23 |                                             |                                                                                           |
| 24 | Age of household member 13                  |                                                                                           |
| 25 |                                             |                                                                                           |
| 26 | Idade membru uma-kain 13                    | (If unsure, please estimate age (to the nearest 10 years))                                |
| 27 |                                             |                                                                                           |
| 28 |                                             |                                                                                           |
| 29 | Adult or child?                             | <input type="radio"/> Adult                                                               |
| 30 |                                             | <input type="radio"/> Child                                                               |
| 31 |                                             | (Only fill this out if age cannot be estimated)                                           |
| 32 |                                             |                                                                                           |
| 33 |                                             |                                                                                           |
| 34 | Study ID number of household member 13      |                                                                                           |
| 35 |                                             |                                                                                           |
| 36 | Númeru ID estudu nian ba membru uma-kain 13 | (Only fill if he/she chooses to participate / Preenxe deit kuandu nia hili atu partisipa) |
| 37 |                                             |                                                                                           |
| 38 |                                             |                                                                                           |
| 39 | Gender of household member 14               | <input type="radio"/> Male / Mane                                                         |
| 40 |                                             | <input type="radio"/> Female / Feto                                                       |
| 41 | Jeneru membru uma-kain 14                   |                                                                                           |
| 42 |                                             |                                                                                           |
| 43 | Age of household member 14                  |                                                                                           |
| 44 |                                             |                                                                                           |
| 45 | Idade membru uma-kain 14                    | (If unsure, please estimate age (to the nearest 10 years))                                |
| 46 |                                             |                                                                                           |
| 47 |                                             |                                                                                           |
| 48 | Adult or child?                             | <input type="radio"/> Adult                                                               |
| 49 |                                             | <input type="radio"/> Child                                                               |
| 50 |                                             | (Only fill this out if age cannot be estimated)                                           |
| 51 |                                             |                                                                                           |
| 52 |                                             |                                                                                           |
| 53 | Study ID number of household member 14      |                                                                                           |
| 54 |                                             |                                                                                           |
| 55 | Númeru ID estudu nian ba membru uma-kain 14 | (Only fill if he/she chooses to participate / Preenxe deit kuandu nia hili atu partisipa) |
| 56 |                                             |                                                                                           |
| 57 |                                             |                                                                                           |
| 58 | Gender of household member 15               | <input type="radio"/> Male / Mane                                                         |
| 59 |                                             | <input type="radio"/> Female / Feto                                                       |
| 60 | Jeneru membru uma-kain 15                   |                                                                                           |

|    |                                             |                                                                                           |
|----|---------------------------------------------|-------------------------------------------------------------------------------------------|
| 1  | Age of household member 15                  |                                                                                           |
| 2  |                                             |                                                                                           |
| 3  | Idade membru uma-kain 15                    | (If unsure, please estimate age (to the nearest 10 years))                                |
| 4  |                                             |                                                                                           |
| 5  |                                             |                                                                                           |
| 6  | Adult or child?                             | <input type="radio"/> Adult                                                               |
| 7  |                                             | <input type="radio"/> Child                                                               |
| 8  |                                             | (Only fill this out if age cannot be estimated)                                           |
| 9  |                                             |                                                                                           |
| 10 |                                             |                                                                                           |
| 11 | Study ID number of household member 15      |                                                                                           |
| 12 |                                             |                                                                                           |
| 13 | Númeru ID estudu nian ba membru uma-kain 15 | (Only fill if he/she chooses to participate / Preenxe deit kuandu nia hili atu partisipa) |
| 14 |                                             |                                                                                           |
| 15 |                                             |                                                                                           |
| 16 | Gender of household member 16               | <input type="radio"/> Male / Mane                                                         |
| 17 |                                             | <input type="radio"/> Female / Feto                                                       |
| 18 | Jeneru membru uma-kain 16                   |                                                                                           |
| 19 |                                             |                                                                                           |
| 20 | Age of household member 16                  |                                                                                           |
| 21 |                                             |                                                                                           |
| 22 | Idade membru uma-kain 16                    | (If unsure, please estimate age (to the nearest 10 years))                                |
| 23 |                                             |                                                                                           |
| 24 |                                             |                                                                                           |
| 25 | Adult or child?                             | <input type="radio"/> Adult                                                               |
| 26 |                                             | <input type="radio"/> Child                                                               |
| 27 |                                             | (Only fill this out if age cannot be estimated)                                           |
| 28 |                                             |                                                                                           |
| 29 |                                             |                                                                                           |
| 30 | Study ID number of household member 16      |                                                                                           |
| 31 |                                             |                                                                                           |
| 32 | Númeru ID estudu nian ba membru uma-kain 16 | (Only fill if he/she chooses to participate / Preenxe deit kuandu nia hili atu partisipa) |
| 33 |                                             |                                                                                           |
| 34 |                                             |                                                                                           |
| 35 | Gender of household member 17               | <input type="radio"/> Male / Mane                                                         |
| 36 |                                             | <input type="radio"/> Female / Feto                                                       |
| 37 | Jeneru membru uma-kain 17                   |                                                                                           |
| 38 |                                             |                                                                                           |
| 39 | Age of household member 17                  |                                                                                           |
| 40 |                                             |                                                                                           |
| 41 | Idade membru uma-kain 17                    | (If unsure, please estimate age (to the nearest 10 years))                                |
| 42 |                                             |                                                                                           |
| 43 |                                             |                                                                                           |
| 44 | Adult or child?                             | <input type="radio"/> Adult                                                               |
| 45 |                                             | <input type="radio"/> Child                                                               |
| 46 |                                             | (Only fill this out if age cannot be estimated)                                           |
| 47 |                                             |                                                                                           |
| 48 |                                             |                                                                                           |
| 49 | Study ID number of household member 17      |                                                                                           |
| 50 |                                             |                                                                                           |
| 51 | Númeru ID estudu nian ba membru uma-kain 17 | (Only fill if he/she chooses to participate / Preenxe deit kuandu nia hili atu partisipa) |
| 52 |                                             |                                                                                           |
| 53 |                                             |                                                                                           |
| 54 | Gender of household member 18               | <input type="radio"/> Male / Mane                                                         |
| 55 |                                             | <input type="radio"/> Female / Feto                                                       |
| 56 | Jeneru membru uma-kain 18                   |                                                                                           |
| 57 |                                             |                                                                                           |
| 58 | Age of household member 18                  |                                                                                           |
| 59 |                                             |                                                                                           |
| 60 | Idade membru uma-kain 18                    | (If unsure, please estimate age (to the nearest 10 years))                                |

|    |                                                                                                             |                                                              |
|----|-------------------------------------------------------------------------------------------------------------|--------------------------------------------------------------|
| 1  | Adult or child?                                                                                             | <input type="radio"/> Adult                                  |
| 2  |                                                                                                             | <input type="radio"/> Child                                  |
| 3  |                                                                                                             | (Only fill this out if age cannot be estimated)              |
| 4  |                                                                                                             |                                                              |
| 5  | Study ID number of household member 18                                                                      |                                                              |
| 6  |                                                                                                             |                                                              |
| 7  | Númeru ID estudu nian ba membru uma-kain 18                                                                 | (Only fill if he/she chooses to participate /                |
| 8  |                                                                                                             | Preenxe deit kuandu nia hili atu partisipa)                  |
| 9  |                                                                                                             |                                                              |
| 10 | Gender of household member 19                                                                               | <input type="radio"/> Male / Mane                            |
| 11 |                                                                                                             | <input type="radio"/> Female / Feto                          |
| 12 | Jeneru membru uma-kain 19                                                                                   |                                                              |
| 13 |                                                                                                             |                                                              |
| 14 |                                                                                                             |                                                              |
| 15 | Age of household member 19                                                                                  |                                                              |
| 16 |                                                                                                             |                                                              |
| 17 | Idade membru uma-kain 19                                                                                    | (If unsure, please estimate age (to the nearest 10           |
| 18 |                                                                                                             | years))                                                      |
| 19 |                                                                                                             |                                                              |
| 20 | Adult or child?                                                                                             | <input type="radio"/> Adult                                  |
| 21 |                                                                                                             | <input type="radio"/> Child                                  |
| 22 |                                                                                                             | (Only fill this out if age cannot be estimated)              |
| 23 |                                                                                                             |                                                              |
| 24 | Study ID number of household member 19                                                                      |                                                              |
| 25 |                                                                                                             |                                                              |
| 26 | Númeru ID estudu nian ba membru uma-kain 19                                                                 | (Only fill if he/she chooses to participate /                |
| 27 |                                                                                                             | Preenxe deit kuandu nia hili atu partisipa)                  |
| 28 |                                                                                                             |                                                              |
| 29 |                                                                                                             |                                                              |
| 30 | Gender of household member 20                                                                               | <input type="radio"/> Male / Mane                            |
| 31 |                                                                                                             | <input type="radio"/> Female / Feto                          |
| 32 | Jeneru membru uma-kain 20                                                                                   |                                                              |
| 33 |                                                                                                             |                                                              |
| 34 | Age of household member 20                                                                                  |                                                              |
| 35 |                                                                                                             |                                                              |
| 36 | Idade membru uma-kain 20                                                                                    | (If unsure, please estimate age (to the nearest 10           |
| 37 |                                                                                                             | years))                                                      |
| 38 |                                                                                                             |                                                              |
| 39 | Adult or child?                                                                                             | <input type="radio"/> Adult                                  |
| 40 |                                                                                                             | <input type="radio"/> Child                                  |
| 41 |                                                                                                             | (Only fill this out if age cannot be estimated)              |
| 42 |                                                                                                             |                                                              |
| 43 | Study ID number of household member 20                                                                      |                                                              |
| 44 |                                                                                                             |                                                              |
| 45 | Númeru ID estudu nian ba membru uma-kain 20                                                                 | (Only fill if he/she chooses to participate /                |
| 46 |                                                                                                             | Preenxe deit kuandu nia hili atu partisipa)                  |
| 47 |                                                                                                             |                                                              |
| 48 |                                                                                                             |                                                              |
| 49 | At any time in the past 12 months, has anyone sprayed the interior walls of your house?                     | <input type="checkbox"/> Yes / Sim                           |
| 50 |                                                                                                             | <input type="checkbox"/> No / Lae                            |
| 51 |                                                                                                             | <input type="checkbox"/> Don't know / hatene                 |
| 52 | Durante fulan 12 liu-bá, iha ema ruma mai rega ita boot nia moru/uma nia didin lolon (parte laran), ka lae? |                                                              |
| 53 |                                                                                                             |                                                              |
| 54 |                                                                                                             |                                                              |
| 55 |                                                                                                             |                                                              |
| 56 | What do you use to stop being bitten by mosquitoes at night time?                                           | <input type="checkbox"/> Sprays / Rega ho aimoruk susuk nian |
| 57 |                                                                                                             | <input type="checkbox"/> Coils / Ai-moruk susuk nian (sunu)  |
| 58 |                                                                                                             | <input type="checkbox"/> Bednets / Moskiteiru                |
| 59 | Saida mak ita bo'ot uza hodi prevene susuk labele tata iha tempu kalan?                                     | <input type="checkbox"/> Other / Seluk                       |
| 60 |                                                                                                             | <input type="checkbox"/> None / La iha                       |



1 Please specify

2  
3 Favor espesifika

4  
5  
6  
7  
8  
9  
10  
11  
12  
13  
14  
15  
16  
17  
18  
19  
20  
21  
22  
23  
24  
25  
26  
27  
28  
29  
30  
31  
32  
33  
34  
35  
36  
37  
38  
39  
40  
41  
42  
43  
44  
45  
46  
47  
48  
49  
50  
51  
52  
53  
54  
55  
56  
57  
58  
59  
60

For peer review only

# Individual Participant Questionnaire

Record ID

## Demographic information

### Informasaun Demográfiku

Household number

Númeru Uma-kain

Study ID number

Númeru ID estudu

(Use number on sample sticker / Uza númeru iha amostra nia sticker)

Name of interviewer

Naran entrevistador

Date of interview

Data halao entrevista

First name

Naran prinsipal

Family name

Naran Familia

Gender

- Female / Feto  
 Male / Mane  
 Other/Unknown / Seluk/La hatene

Jeneru

Date of birth

Data moris

Age

Idade

(Only need to fill if date-of-birth is not known / Presiza atu preenxe deit karik la hatene data moris)

Phone number(s)

Numeru Telemovel

Email address

|    |                                                                 |                                              |
|----|-----------------------------------------------------------------|----------------------------------------------|
| 1  | Nationality                                                     | <input type="radio"/> Timorese / Timor oan   |
| 2  |                                                                 | <input type="radio"/> Other / seluk          |
| 3  | Nasionalidade                                                   |                                              |
| 4  |                                                                 |                                              |
| 5  | Specify                                                         |                                              |
| 6  |                                                                 |                                              |
| 7  | Espesifika                                                      | _____                                        |
| 8  |                                                                 |                                              |
| 9  |                                                                 |                                              |
| 10 | Have you traveled outside Timor-Leste (including West           | <input type="radio"/> Yes / Sim              |
| 11 | Timor, NTT) within the last 6 MONTHS?                           | <input type="radio"/> No / Lae               |
| 12 |                                                                 | <input type="radio"/> Don't know / La hatene |
| 13 | Iha fulan 6 ikus liu, ita bo'ot halao viajen ba                 |                                              |
| 14 | rai-liur ka lae (inklui nasaun viziño Indonesia nia             |                                              |
| 15 | provinsia, NTT)?                                                |                                              |
| 16 |                                                                 |                                              |
| 17 | Where did you travel (in the last 6 months)?                    | <input type="radio"/> West Timor (NTT)       |
| 18 |                                                                 | <input type="radio"/> Other / Seluk          |
| 19 | Ita bo'ot ba iha rai ne'ebé? (iha fulan 6 ikus liu)             |                                              |
| 20 |                                                                 |                                              |
| 21 | Please specify the country (or countries) you went to           |                                              |
| 22 | (in the last 6 months)                                          | _____                                        |
| 23 |                                                                 |                                              |
| 24 | Favor espesifika nasaun sira ne'ebé mak ita bo'ot               |                                              |
| 25 | viajem ba ona (iha fulan 6 ikus liu)                            |                                              |
| 26 |                                                                 |                                              |
| 27 | Have you ever traveled outside Timor-Leste in your              | <input type="radio"/> Yes / Sim              |
| 28 | lifetime (but MORE THAN 6 MONTHS AGO)? This includes            | <input type="radio"/> No / Lae               |
| 29 | travel to West Timor (NTT).                                     | <input type="radio"/> Don't know / La hatene |
| 30 |                                                                 |                                              |
| 31 | Ita bo'ot halao ona viajem fora husi Timor-Leste,               |                                              |
| 32 | durante vida moris? (maibe husi fulan 6 liu-bá                  |                                              |
| 33 | kotuk)? Ida ne'e inklui viajem provinsia NTT                    |                                              |
| 34 |                                                                 |                                              |
| 35 | Where did you travel (MORE THAN 6 MONTHS AGO)?                  | <input type="radio"/> West Timor (NTT)       |
| 36 |                                                                 | <input type="radio"/> Other / Seluk          |
| 37 | Ita bo'ot viajen ba iha rai ne'ebé (FULAN 6 IKUS LIU            |                                              |
| 38 | BA KOTUK)?                                                      |                                              |
| 39 |                                                                 |                                              |
| 40 | Please specify the country (or countries) you went to           |                                              |
| 41 | MORE THAN 6 MONTHS AGO                                          | _____                                        |
| 42 |                                                                 |                                              |
| 43 | Favor espesifika nasaun sira ne'ebé mak ita bo'ot ba            |                                              |
| 44 | ona Iha FULAN 6 IKUS LIU BA KOTUK                               |                                              |
| 45 |                                                                 |                                              |
| 46 |                                                                 |                                              |
| 47 | <b>Questions about febrile illness within the last 6 months</b> |                                              |
| 48 |                                                                 |                                              |
| 49 |                                                                 |                                              |
| 50 | <b>Pergunta konaba moras isin manas iha fulan 6 ikus liu</b>    |                                              |
| 51 |                                                                 |                                              |
| 52 | Have you been unwell with a FEVER within the last 6             | <input type="radio"/> Yes / Sim              |
| 53 | months?                                                         | <input type="radio"/> No / Lae               |
| 54 |                                                                 | <input type="radio"/> Don't know / La hatene |
| 55 | Ita bo'ot sente moras ho ISIN MANAS iha fulan 6 ikus            |                                              |
| 56 | liu nia laran ka lae?                                           |                                              |
| 57 |                                                                 |                                              |
| 58 |                                                                 |                                              |
| 59 |                                                                 |                                              |
| 60 |                                                                 |                                              |

|                                                                |                                                                                                                                                                                                                                                                                                                                                    |                                                                                                                                                                                                                                                                                                                                                                                                                              |
|----------------------------------------------------------------|----------------------------------------------------------------------------------------------------------------------------------------------------------------------------------------------------------------------------------------------------------------------------------------------------------------------------------------------------|------------------------------------------------------------------------------------------------------------------------------------------------------------------------------------------------------------------------------------------------------------------------------------------------------------------------------------------------------------------------------------------------------------------------------|
| 1<br>2<br>3<br>4<br>5<br>6<br>7                                | When you had this illness, did you seek any medical care?<br><br>Iha momentu ita bo'ot hetan moras ida-ne'e, ita bo'ot ba konsulta iha fasilidade saúde ka lae?                                                                                                                                                                                    | <input type="radio"/> Yes / Sim<br><input type="radio"/> No / Lae<br><input type="radio"/> Don't know / La hatene<br>(Includes medical clinic, pharmacy, hospital etc. / Inklui klinika mediku, farmasia, hospital, etc.)                                                                                                                                                                                                    |
| 8<br>9<br>10<br>11<br>12<br>13<br>14<br>15<br>16               | When you sought medical care with fever in the last 6 months, did you get diagnosed by a healthcare professional with any of the following infections?<br><br>Wainhira ita bo'ot buka tratamentu husi mediku sira ho isin manas iha fulan 6 ikus liu, ita bo'ot hetan diagnostiku husi professional saúde ho infeksaun hirak tuir mai ne'e ka lae? | <input type="checkbox"/> COVID-19<br><input type="checkbox"/> Dengue / Denge<br><input type="checkbox"/> Malaria<br><input type="checkbox"/> Other / Seluk<br><input type="checkbox"/> No specific diagnosis was made / La halo diagnostiku espesifiku                                                                                                                                                                       |
| 17<br>18<br>19<br>20<br>21<br>22<br>23<br>24<br>25<br>26       | When you were diagnosed with COVID-19, how was this diagnosis made?<br><br>Wainhira ita bo'ot diagnoza ho COVID-19, oinsa mak hetan diagnoza ida ne'e?                                                                                                                                                                                             | <input type="radio"/> I was tested for COVID-19 and the test was POSITIVE / Hau halo teste ba COVID-19 no teste nia rezultadu POZITIVU<br><input type="radio"/> I did NOT receive a positive test, but I was diagnosed with COVID-19 anyway / Hau la hetan teste pozitivu, maibe nafatin diagnoza hau ho COVID-19<br><input type="radio"/> I don't know if I was tested or not / Hau la hatene karik hau teste ona ou seidak |
| 27<br>28<br>29<br>30<br>31<br>32<br>33<br>34<br>35             | When you were diagnosed with DENGUE, how was this diagnosis made?<br><br>Wainhira ita bo'ot diagnoza ho DENGUE, oinsa mak hetan diagnoza ida ne'e?                                                                                                                                                                                                 | <input type="radio"/> I was tested for DENGUE and the test was POSITIVE / Hau halo teste ba DENGUE no teste nia rezultadu POZITIVU<br><input type="radio"/> I did NOT receive a positive test, but I was diagnosed with DENGUE anyway / Hau la hetan teste pozitivu, maibe nafatin diagnoza hau ho DENGUE<br><input type="radio"/> I don't know if I was tested or not / Hau la hatene karik hau teste ona ou seidak         |
| 36<br>37<br>38<br>39<br>40<br>41<br>42<br>43<br>44<br>45<br>46 | When you were diagnosed with MALARIA, how was this diagnosis made?<br><br>Wainhira ita bo'ot diagnoza ho MALARIA, oinsa mak hetan diagnoza ida ne'e?                                                                                                                                                                                               | <input type="radio"/> I was tested for MALARIA and the test was POSITIVE / Hau halo teste ba MALARIA no teste nia rezultadu POZITIVU<br><input type="radio"/> I did NOT receive a positive test, but I was diagnosed with MALARIA anyway / Hau la hetan teste pozitivu, maibe nafatin diagnoza hau ho MALARIA<br><input type="radio"/> I don't know if I was tested or not / Hau la hatene karik hau teste ona ou seidak     |
| 47                                                             | <b>Questions about PREVIOUS illness and vaccination</b>                                                                                                                                                                                                                                                                                            |                                                                                                                                                                                                                                                                                                                                                                                                                              |
| 48<br>49<br>50<br>51<br>52<br>53<br>54<br>55                   | Have you ever been diagnosed with COVID-19 by a healthcare worker in your life (even MORE THAN 6 MONTHS AGO)?<br><br>Antes ne'e doutor sira diagnoza ona ita bo'ot ho COVID-19 ka lae, iha ita bo'ot nia moris (BELE LIU HUSI FULAN 6 BA KOTUK)                                                                                                    | <input type="radio"/> Yes / Sim<br><input type="radio"/> No / Lae<br><input type="radio"/> Don't know / La hatene<br>(Answer 'yes', even if a COVID diagnosis within 6 months was reported in previous answers / Hatán 'Sim', maske diagnoza ho COVID-19 iha fulan 6 nia laran ne'e relata ona iha resposta anterior)                                                                                                        |
| 56<br>57<br>58<br>59<br>60                                     | When did you get diagnosed with COVID-19?<br><br>Ita bo'ot hetan diagnostiku ho COVID-19 ne'e iha loran saida?                                                                                                                                                                                                                                     | (Enter approximate date if unsure, leave blank if unknown / Hatama data tuir hanoin karik la serteza, husik mamuk deit karik la hatene)                                                                                                                                                                                                                                                                                      |

|                                                    |                                                                                                                                                                                                                                            |                                                                                                                                                                                                                                                                                                                               |
|----------------------------------------------------|--------------------------------------------------------------------------------------------------------------------------------------------------------------------------------------------------------------------------------------------|-------------------------------------------------------------------------------------------------------------------------------------------------------------------------------------------------------------------------------------------------------------------------------------------------------------------------------|
| 1<br>2<br>3<br>4<br>5<br>6<br>7<br>8               | Have you ever been diagnosed by a healthcare worker with DENGUE in your life (even MORE THAN 6 MONTHS AGO)?<br>Antes ne'e doutor sira diagnoza ona ita bo'ot ho DENGUE ka lae, iha ita bo'ot nia moris (BELE LIU HUSI FULAN 6 BA KOTUK)?   | <input type="radio"/> Yes / Sim<br><input type="radio"/> No / Lae<br><input type="radio"/> Don't know / La hatene<br>(Answer 'yes', even if a DENGUE diagnosis within 6 months was reported in previous answers / Hatán 'Sim', maske diagnoza ho DENGUE iha fulan 6 nia laran ne'e relata ona iha resposta anterior)          |
| 9<br>10<br>11<br>12<br>13<br>14<br>15<br>16<br>17  | Have you ever been diagnosed by a healthcare worker with MALARIA in your life (even MORE THAN 6 MONTHS AGO)?<br>Antes ne'e doutor sira diagnoza ona ita bo'ot ho MALARIA ka lae, iha ita bo'ot nia moris (BELE LIU HUSI FULAN 6 BA KOTUK)? | <input type="radio"/> Yes / Sim<br><input type="radio"/> No / Lae<br><input type="radio"/> Don't know / La hatene<br>(Answer 'yes', even if a MALARIA diagnosis within 6 months was reported in previous answers / Hatán 'Sim', maske kuandu diagnoza ho MALARIA iha fulan 6 nia laran ne'e relata ona iha resposta anterior) |
| 18<br>19<br>20<br>21                               | Have you received vaccination for COVID-19?<br>Ita bo'ot simu ona vasinasaun ba COVID-19?                                                                                                                                                  | <input type="radio"/> Yes / Sim<br><input type="radio"/> No / Lae                                                                                                                                                                                                                                                             |
| 22<br>23<br>24<br>25<br>26<br>27                   | Number of doses<br>Numeru dose                                                                                                                                                                                                             | <input type="radio"/> 1<br><input type="radio"/> 2<br><input type="radio"/> 3<br><input type="radio"/> More than 3 / Liu husi 3                                                                                                                                                                                               |
| 28<br>29<br>30<br>31<br>32<br>33                   | When was your FIRST COVID-19 vaccine?<br>Ita bo'ot nia vasina COVID-19 primeiru ne'e simu iha loron saida?                                                                                                                                 | <input type="text"/><br>(Enter approximate date if unsure, leave blank if unknown / Hatama data tuir hanoin karik la serteza, husik mamuk deit karik la hatene)                                                                                                                                                               |
| 34<br>35<br>36<br>37<br>38<br>39                   | Which type of COVID-19 vaccine was your FIRST dose?<br>Vasina COVID-19 nia tipu ida ne'ebé mak ita bo'ot simu ba dose primeiru?                                                                                                            | <input type="checkbox"/> AstraZenica<br><input type="checkbox"/> Sinovac<br><input type="checkbox"/> Pfizer<br><input type="checkbox"/> Other / Seluk<br><input type="checkbox"/> Don't know / La hatene                                                                                                                      |
| 40<br>41<br>42<br>43<br>44<br>45                   | When was your SECOND COVID-19 vaccine?<br>Ita bo'ot nia vasina COVID-19 segundu ne'e simu iha loron saida?                                                                                                                                 | <input type="text"/><br>(Enter approximate date if unsure, leave blank if unknown / Hatama data tuir hanoin karik la serteza, husik mamuk deit karik la hatene)                                                                                                                                                               |
| 46<br>47<br>48<br>49<br>50<br>51                   | Which type of COVID-19 vaccine was your SECOND dose?<br>Vasina COVID-19 nia tipu ida ne'ebé mak ita bo'ot simu ba dose segundu?                                                                                                            | <input type="checkbox"/> AstraZenica<br><input type="checkbox"/> Sinovac<br><input type="checkbox"/> Pfizer<br><input type="checkbox"/> Other / Seluk<br><input type="checkbox"/> Don't know / La hatene                                                                                                                      |
| 52<br>53<br>54<br>55<br>56<br>57<br>58<br>59<br>60 | When was your THIRD COVID-19 vaccine?<br>Ita bo'ot nia vasina COVID-19 terseiru ne'e simu iha loron saida?                                                                                                                                 | <input type="text"/><br>(Enter approximate date if unsure, leave blank if unknown / Hatama data tuir hanoin karik la serteza, husik mamuk deit karik la hatene)                                                                                                                                                               |

1 Which type of COVID-19 vaccine was your THIRD dose?  AstraZenica  
 2  Sinovac  
 3 Vasina COVID-19 nia tipu ida ne'ebé mak ita bo'ot  Pfizer  
 4 simu ba dose terseiru?  Other / Seluk  
 5  Don't know / La hatene  
 6

7 If you have had more than three COVID-19 vaccines,  
 8 when was your MOST RECENT dose?  
 9 \_\_\_\_\_  
 10 (Enter approximate date if unsure, leave blank if  
 11 unknown / Hatama data tuir hanoin karik la  
 12 serteza, husik mamuk deit karik la hatene)  
 13

14 If you have had more than three doses of COVID  
 15 vaccines, which type have you recieved for your MOST  
 16 RECENT DOSE?  AstraZenica  
 17  Sinovac  
 18  Pfizer  
 19  Other / Seluk  
 20  Don't know / La hatene  
 21 Karik ita bo'ot simu vasina COVID-19 ne'e barak liu  
 22 dala tolu, tipu vasina ida ne'ebé mak ita bo'ot simu  
 23 ikus liu?  
 24

25 Do you wish to be vaccinated for COVID-19?  Yes / Sim  
 26  No / Lae  
 27  Don't know / La hatene  
 28  Not applicable - too young to answer this question  
 29 / La aplikavel - sei kiik seidauk bele hatán  
 30 ba pergunta ida ne'e  
 31 (Only for participants who have not received any  
 32 doses of COVID-19 vaccines / pergunta ida ne'e  
 33 husu deit ba partisipante sira ne'ebé mak seidauk  
 34 simu vasina COVID-19 nia dose ruma)  
 35

36 Why have you not received a SECOND dose of COVID-19  
 37 vaccine?  It is less than 3 months since my first dose,  
 38 therefore my second dose is not due yet /  
 39 Seidauk to'o fulan 3, desde hau nia vasina dose  
 40 primeiru, tamba ne'e hau nia dose segundu nia  
 41 tempu seidauk to'o  
 42  It is more than 3 months since my first dose, but  
 43 I have not been offered a second dose yet /  
 44 Tempu liu tiha ona fulan 3 desde hau nia dose  
 45 primeiru, maibe hau seidauk hetan dose segundu  
 46  I got COVID-19 infection after my first dose,  
 47 therefore I don't think I need another dose /  
 48 Hau hetan infeksaun COVID-19 depois de simu dose  
 49 primeiru, tamba ne'e hau hanoin hau la presiza  
 50 dose seluk tan  
 51  I don't want to have another dose / Hau lakoi  
 52 atu simu dose seluk tan  
 53  Other / Seluk  
 54 (Only asked to participants who have received just  
 55 one dose of COVID-19 vaccine / Husu deit ba  
 56 partisipante sira ne'ebé mak simu ona vasina  
 57 COVID-19 nia dose primeiru)  
 58

59 Why don't you want another dose?  
 60 \_\_\_\_\_  
 61 Tamba saida mak ita bo'ot lakoi simu dose segundu?  
 62 \_\_\_\_\_

63 Please specify  
 64 \_\_\_\_\_  
 65 Favor espesifika  
 66 \_\_\_\_\_

# Unable to Complete Questionnaire

Record ID \_\_\_\_\_

**Fill this form if Household Questionnaire cannot be filled out (i.e. no data can be collected from the household)**

Household number \_\_\_\_\_

Why could no data be collected?

- Household occupied but head-of-household does not wish to fill out Household Questionnaire
- Household looks occupied but no adult household members were present during all three visits
- Household looks derelict
- Household has been demolished
- Cannot access household

Please state the reason you couldn't find the household \_\_\_\_\_

For peer review only

## VASINA fieldwork SOP – data and sample collection

### For each household, do the following:

1. **Introduce research team to head-of-household and other household member(s)**
  - Explain study, using patient information sheet
  - Wear mask and visor for this
2. **Conduct *Household Questionnaire* on RedCap with head-of-household**
  - Fill this out even if no household members give consent for individual data or samples to be collected (if this is the case, head-of-household should still fill consent form)
  - If head-of-household does not wish to fill *Household Questionnaire* on RedCap, fill *Unable to Complete Questionnaire* on RedCap
3. **Each time you enrol an individual, give them a sticker with their Study ID number on it**
  - Children less than 1 year old should not be enrolled and do not need to be assigned a Study ID number (but their details should still be included on the *Household Questionnaire*)
  - For individuals who are not currently present, assign a study ID number, but keep his/her sticker until the next visit

### For each participant, do the following:

4. **Receive written informed consent (signed form)**
  - For children, receive written informed consent from one of their parents
  - Also receive 'verbal assent' from the child
5. **Conduct *Individual Participant Questionnaire* on RedCap**
6. **Don PPE**
7. **Phlebotomy (maximum x2 attempts)**
  - Adults: use needle and syringe to collect 10ml (x2 tubes)
  - Children: use needle and syringe or butterfly to collect 5ml (x1 tube)
  - Also place x9-12 drops onto filter paper to make three blood spots (*see Dried Blood Spot SOP*).
  - Make sure blood tubes and dried blood spots are clearly labelled with stickers
8. **Finger-prick blood sample (where phlebotomy failed)**
  - Collect 2mls of blood drops into paediatric serum tubes
  - Collect x9-12 drops onto filter paper to make three blood spots.
  - Make sure blood tubes and dried blood spots are clearly labelled with stickers
9. **Store samples**
  - Put labelled blood samples into cool box



1  
2  
3 - Allow blood spot to dry for 4 hours, put into zip-lock bag with desiccant sachet. Put this  
4 into cool box  
5  
6

7 **10. Equipment disposal**

- 8 - Place all sharps into sharps container  
9 - Place all other phlebotomy equipment into clinical waste bags  
10 - Dengue RDT can be disposed of, after good-quality picture and interpretation is done  
11

12  
13 **11. Thank household member(s) and make sure they have a copy of the participant**  
14 **information sheet**

15  
16 **12. Make sure gloves and apron are changed and hands are washed/alcohol gelled before**  
17 **moving onto next participant**  
18  
19  
20  
21  
22  
23  
24  
25  
26  
27  
28  
29  
30  
31  
32  
33  
34  
35  
36  
37  
38  
39  
40  
41  
42  
43  
44  
45  
46  
47  
48  
49  
50  
51  
52  
53  
54  
55  
56  
57  
58  
59  
60

# BMJ Open

## Vaccine Preventable Disease Seroprevalence In a Nationwide Assessment of Timor-Leste (VASINA-TL) - study protocol for a population-representative cross-sectional serosurvey

|                                 |                                                                                                                                                                                                                                                                                                                                                                                                                                                                                                                                                                                                                                                                                                                                                                                                                                                                                                                                                                                                                                                                                                                                                                                                                                                                                                                                                                                                                                                                                                                                                                                                                                                                                                                                                                                                                                                                                                                                                                                                       |
|---------------------------------|-------------------------------------------------------------------------------------------------------------------------------------------------------------------------------------------------------------------------------------------------------------------------------------------------------------------------------------------------------------------------------------------------------------------------------------------------------------------------------------------------------------------------------------------------------------------------------------------------------------------------------------------------------------------------------------------------------------------------------------------------------------------------------------------------------------------------------------------------------------------------------------------------------------------------------------------------------------------------------------------------------------------------------------------------------------------------------------------------------------------------------------------------------------------------------------------------------------------------------------------------------------------------------------------------------------------------------------------------------------------------------------------------------------------------------------------------------------------------------------------------------------------------------------------------------------------------------------------------------------------------------------------------------------------------------------------------------------------------------------------------------------------------------------------------------------------------------------------------------------------------------------------------------------------------------------------------------------------------------------------------------|
| Journal:                        | <i>BMJ Open</i>                                                                                                                                                                                                                                                                                                                                                                                                                                                                                                                                                                                                                                                                                                                                                                                                                                                                                                                                                                                                                                                                                                                                                                                                                                                                                                                                                                                                                                                                                                                                                                                                                                                                                                                                                                                                                                                                                                                                                                                       |
| Manuscript ID                   | bmjopen-2022-071381.R1                                                                                                                                                                                                                                                                                                                                                                                                                                                                                                                                                                                                                                                                                                                                                                                                                                                                                                                                                                                                                                                                                                                                                                                                                                                                                                                                                                                                                                                                                                                                                                                                                                                                                                                                                                                                                                                                                                                                                                                |
| Article Type:                   | Protocol                                                                                                                                                                                                                                                                                                                                                                                                                                                                                                                                                                                                                                                                                                                                                                                                                                                                                                                                                                                                                                                                                                                                                                                                                                                                                                                                                                                                                                                                                                                                                                                                                                                                                                                                                                                                                                                                                                                                                                                              |
| Date Submitted by the Author:   | 05-Apr-2023                                                                                                                                                                                                                                                                                                                                                                                                                                                                                                                                                                                                                                                                                                                                                                                                                                                                                                                                                                                                                                                                                                                                                                                                                                                                                                                                                                                                                                                                                                                                                                                                                                                                                                                                                                                                                                                                                                                                                                                           |
| Complete List of Authors:       | <p>Arkell, Paul; Menzies School of Health Research Timor-Leste Office<br/>           Sheridan, Sarah L; National Centre for Immunisation Research and Surveillance (NCIRS)<br/>           Martins, Nelson; Menzies School of Health Research Timor-Leste Office<br/>           Tanesi, Maria; Menzies School of Health Research Timor-Leste Office<br/>           Gomes, Nelia; Menzies School of Health Research Timor-Leste Office<br/>           Amaral, Salvador; Menzies School of Health Research Timor-Leste Office<br/>           Oakley, Tessa; Menzies School of Health Research Timor-Leste Office<br/>           Solano, Vanessa; Charles Darwin University<br/>           David, Michael; The University of Sydney, The Daffodil Centre; Griffith University, School of Medicine and Dentistry<br/>           Draper, Anthony ; Menzies School of Health Research Timor-Leste Office; Northern Territory Centre for Disease Control<br/>           Sarmento, Nevio; Menzies School of Health Research Timor-Leste Office<br/>           da Silva, Endang; Laboratório Nacional da Saúde<br/>           Alves, Lucsendar; Menzies School of Health Research<br/>           Freitas, Carlito; Ministry of Health<br/>           Machado, Filipe ; Ministry of Health<br/>           Gusmão, Celia; Hospital Nacional Guido Valadares<br/>           da Costa Barreto, Ismael; Menzies School of Health Research Timor-Leste Office; World Health Organisation<br/>           Fancourt, Nicholas ; Menzies School of Health Research Timor-Leste Office<br/>           Macartney, Kristine; The University of Sydney School of Medicine, National Centre for Immunisation Research and Surveillance<br/>           Yan, Jennifer; Menzies School of Health Research, Global and Tropical Health Division; Royal Darwin Hospital, Paediatrics<br/>           Francis, Joshua; Menzies School of Health Research, Global and Tropical Health Division; Royal Darwin Hospital, Paediatrics</p> |
| <b>Primary Subject Heading</b>: | Infectious diseases                                                                                                                                                                                                                                                                                                                                                                                                                                                                                                                                                                                                                                                                                                                                                                                                                                                                                                                                                                                                                                                                                                                                                                                                                                                                                                                                                                                                                                                                                                                                                                                                                                                                                                                                                                                                                                                                                                                                                                                   |
| Secondary Subject Heading:      | Public health, Epidemiology, Global health, Health policy, Immunology (including allergy)                                                                                                                                                                                                                                                                                                                                                                                                                                                                                                                                                                                                                                                                                                                                                                                                                                                                                                                                                                                                                                                                                                                                                                                                                                                                                                                                                                                                                                                                                                                                                                                                                                                                                                                                                                                                                                                                                                             |
| Keywords:                       | EPIDEMIOLOGY, EPIDEMIOLOGIC STUDIES, Diagnostic microbiology < INFECTIOUS DISEASES, Epidemiology < INFECTIOUS DISEASES, Public                                                                                                                                                                                                                                                                                                                                                                                                                                                                                                                                                                                                                                                                                                                                                                                                                                                                                                                                                                                                                                                                                                                                                                                                                                                                                                                                                                                                                                                                                                                                                                                                                                                                                                                                                                                                                                                                        |

1  
2  
3  
4  
5  
6  
7  
8  
9  
10  
11  
12  
13  
14  
15  
16  
17  
18  
19  
20  
21  
22  
23  
24  
25  
26  
27  
28  
29  
30  
31  
32  
33  
34  
35  
36  
37  
38  
39  
40  
41  
42  
43  
44  
45  
46  
47  
48  
49  
50  
51  
52  
53  
54  
55  
56  
57  
58  
59  
60

|  |                                                             |
|--|-------------------------------------------------------------|
|  | health < INFECTIOUS DISEASES, STATISTICS & RESEARCH METHODS |
|  |                                                             |

SCHOLARONE™  
Manuscripts

1  
2  
3 **Vaccine Preventable Disease Seroprevalence In a Nationwide Assessment of Timor-**  
4 **Leste (VASINA-TL) - study protocol for a population-representative cross-sectional**  
5 **serosurvey**  
6

7 Paul Arkell<sup>1\*</sup>, Sarah L Sheridan<sup>2</sup>, Nelson Martins<sup>1</sup>, Maria Y Tanesi<sup>1</sup>, Nelia Gomes<sup>1</sup>, Salvador  
8 Amaral<sup>1</sup>, Tessa Oakley<sup>1</sup>, Vanessa Solano<sup>3</sup>, Michael David<sup>4,5</sup>, Anthony DK Draper<sup>1,6,7</sup>, Nevio  
9 Sarmiento<sup>1</sup>, Endang da Silva<sup>8</sup>, Lucsendar Alves<sup>1</sup>, Carlito Freitas<sup>9</sup>, Filipe de Neri Machado<sup>9</sup>,  
10 Celia A Gusmão<sup>10</sup>, Ismael da Costa Barreto<sup>1,11</sup>, Nicholas SS Fancourt<sup>1</sup>, Kristine  
11 Macartney<sup>2,12</sup>, Jennifer Yan<sup>1</sup>, Joshua R Francis<sup>1</sup>  
12

- 13 1. Global and Tropical Health Division, Menzies School of Health Research, Charles  
14 Darwin University, Dili, Timor-Leste
- 15 2. National Centre for Immunisation Research and Surveillance (NCIRS), Westmead,  
16 NSW, Australia
- 17 3. Research Institute for the Environment and Livelihoods, Charles Darwin University,  
18 Darwin, Australia
- 19 4. Daffodil Centre, The University of Sydney, a joint venture with Cancer Council New  
20 South Wales, Sydney, NSW, Australia
- 21 5. School of Medicine & Dentistry, Griffith University, Gold Coast, QLD, Australia
- 22 6. Northern Territory Centre for Disease Control, Darwin, Australia
- 23 7. National Centre for Epidemiology and Population Health, Australian National  
24 University, Canberra, Australia
- 25 8. Laboratório Nacional da Saúde, Dili, Timor-Leste
- 26 9. Ministry of Health, Dili, Timor-Leste
- 27 10. Hospital Nacional Guido Valadares, Dili, Timor-Leste
- 28 11. World Health Organisation, Dili, Timor-Leste
- 29 12. Faculty of Medicine and Health, University of Sydney, Australia

30  
31  
32  
33  
34  
35  
36  
37  
38  
39  
40  
41  
42  
43 \*Corresponding author:

44 Dr Paul Arkell, email: paul.arkell@menzies.edu.au  
45  
46  
47

48 **Word count: 4381**  
49  
50  
51  
52  
53  
54  
55  
56  
57  
58  
59  
60

## ABSTRACT

**Introduction:** Historic disruption in health infrastructure combined with data from a recent vaccine coverage survey suggests there are likely significant immunity gaps to vaccine preventable diseases and high risk of outbreaks in Timor-Leste. Community-based serological surveillance is an important tool to augment understanding of population-level immunity achieved through vaccine coverage and/or derived from prior infection.

**Methods and analysis:** This national population-representative serosurvey will take a three-stage cluster sample and aims to include 5600 individuals above one year of age. Serum samples will be collected by phlebotomy and analysed for measles immunoglobulin G (IgG), rubella IgG, severe acute respiratory syndrome coronavirus-2 anti-spike protein IgG, hepatitis B surface antibody and hepatitis B core antigen using commercially available chemiluminescent immunoassays or enzyme-linked immunosorbent assays. In addition to crude prevalence estimates and to account for differences in Timor-Leste's age structure, stratified age-standardised prevalence estimates will be calculated, using Asia in 2013 as the standard population. Additionally, this survey will derive a national asset of serum and dried blood spot samples which can be used for further investigation of infectious disease sero-epidemiology and/or validation of existing and novel serological assays for infectious diseases.

**Ethics and dissemination:** Ethical approval has been obtained from the Research Ethics and Technical Committee of the Instituto Nacional da Saúde, Timor-Leste and the Human Research Ethics Committee of the Northern Territory Department of Health and Menzies School of Health Research, Australia. Co-designing this study with Timor-Leste Ministry-of-Health and other relevant partner organisations will allow immediate translation of findings into public health policy (which may include changes to routine immunisation service delivery and/or plans for supplementary immunisation activities).

## STRENGTHS AND LIMITATIONS OF THIS STUDY

Strengths include:

- This serosurvey uses a three-stage cluster sample strategy to ensure it includes a representative individuals >1 year of age in Timor-Leste
- Serum samples will be analysed using validated assays and internationally recognised serological cut-offs which relate to VPD correlates of protection
- All procedures will be undertaken in Timor-Leste, representing an opportunity for local research and laboratory capacity building

Limitations include:

- Information on possible immunosuppressive conditions or treatments which may impact on serological responses to infection and vaccination will not be collected
- Serological targets for most pathogens do not distinguish between serological responses to infection and vaccination

## INTRODUCTION

The Democratic Republic of Timor-Leste (Timor-Leste) achieved independence in 2002. It is a half-island nation located between Australia and Indonesia with a population of 1.3 million people. The Expanded Program on Immunisation (EPI) began *circa* 1989 when Timor-Leste was still an Indonesian province. In 1999 there was significant disruption of healthcare infrastructure, including the near cessation of routine vaccine delivery. After independence was regained in 2002, the EPI was reinstated as part of a national vaccination programme, initially with single-dose measles vaccine. Hepatitis B vaccination in infancy (three doses) was introduced by 2007. Birth dose hepatitis B vaccine was introduced in 2016, along with combined measles-rubella (MR) vaccination (two doses). Vaccination against severe acute respiratory syndrome coronavirus 2 (SARS-CoV-2) began in adults in April 2021 and children above 12 years of age in October 2021.

The most comprehensive recent assessment of routine childhood vaccination coverage in Timor-Leste was a survey undertaken in 2018 which used a combination of maternal history and vaccination card review to confirm doses of vaccines given in the first and second years of life. This study found variable uptake between different vaccines and across geographic regions, large differences between 'valid' and 'crude' estimated vaccine coverage and highlighted the need for further investigation of population immunity to vaccine-preventable diseases (VPDs, see table 1).<sup>1</sup>

*If you have room – be great to mention limitations of vaccine coverage surveys (which I increasing think are rubbish, and better to invest the money and time into serosurveys) – including limitation of various methods of vaccine coverage reporting (inaccuracy of verbal report, incompleteness of written records) and limitation of using receipt of a vaccine as proxy for immunity, in contexts where cold chain may not be reliable. Attached a paper to the email which compares serosurvey results to administrative data and vaccine coverage survey data in Ethiopia.*

1  
2  
3 <Table 1 here>  
4

5  
6 For many pathogens, including measles, rubella, hepatitis B and SARS-CoV-2, specific  
7 immunoglobulin G (IgG) antibodies can be detected in the blood for many years, and  
8 sometimes lifelong, following infection or vaccination. In some cases, a specific quantity  
9 and/or quality of antibody in individuals' sera has been associated with protection from  
10 infection upon subsequent exposure. Presence above antibody cut-off levels can in some  
11 contexts infer protection, although how much such levels correlate with protection, varies on  
12 a range of factors.<sup>2,3</sup> Nonetheless, community-based serological surveillance is an  
13 important tool to augment understanding of population level immunity achieved through  
14 vaccine coverage over many years and/or immunity to VPDs derived from prior infection.<sup>4</sup>  
15 The results of serosurveys can be used to guide supplementary immunisation activities  
16 (SIAs), and tailor routine immunisation service delivery. There have been no previous  
17 community-based studies estimating VPD seroprevalence in Timor-Leste. However, targeted  
18 seroprevalence studies including healthcare workers in Timor-Leste have identified lower  
19 than expected seropositivity against measles, high seropositivity against SARS-CoV-2 and a  
20 high prevalence of active hepatitis B infection.<sup>5,6</sup>  
21  
22  
23  
24  
25  
26  
27  
28  
29  
30  
31  
32  
33  
34  
35  
36

37  
38 This paper describes the protocol for a first and comprehensive national population-  
39 representative serosurvey of multiple VPDs. The survey is also designed to derive a national  
40 asset of serum and dried blood spot (DBS) samples which can be used for further  
41 investigation of infectious disease sero-epidemiology in Timor-Leste.  
42  
43  
44  
45  
46  
47  
48  
49

## 50 **METHODS AND ANALYSIS**

51  
52  
53 **Aim:** To determine the seroprevalence of measles, rubella, hepatitis B and SARS-CoV-2  
54 among individuals of different age-strata in Timor-Leste.  
55

56  
57 **Design:** Population-representative, national cross-sectional serological survey.  
58  
59  
60



1  
2  
3 **Setting:** Recruitment and data collection will occur in the community (within households)  
4 across Timor-Leste. Laboratory analysis will occur at Laboratório Nacional da Saúde (LNS)  
5 in Dili, Timor-Leste.  
6  
7  
8  
9

10 **Sampling methods:** Timor-Leste is made up of 12 municipalities and one Special Region  
11 (*Região Administrativa Especial de Oecusse Ambeno*), some of which are divided into sub-  
12 municipalities (*Posto administrativos*). Atauro is a 14th municipality but through legacy is  
13 included as part of the Municipality of Dili. Each (sub-)municipality is divided into *sucos*  
14 (villages), which are further divided into *aldeias* (hamlets). In 2015, a national census took  
15 place in Timor-Leste. All households in the country were visited in-person, assigned a  
16 household number and global positioning (GPS) coordinates, and grouped into 2320  
17 'enumeration areas' (EAs, the boundaries of which roughly correspond to those of each  
18 aldeia, see Figure 1).  
19  
20  
21  
22  
23  
24  
25  
26  
27  
28  
29

30 <Figure 1 here>  
31

32 A three-stage cluster random sample will be taken. First, a pre-specified number of EAs will  
33 be randomly selected from all EAs in the country, with probability proportionate to  
34 municipality population. Second, within each participating EA, a pre-specified number of  
35 households will be randomly selected from all households in that EA. Third, all occupants at  
36 participating households who meet eligibility criteria will be invited into the study.  
37  
38  
39  
40  
41  
42  
43

44 A household will be defined as a dwelling unit that consists of a person or a group of related  
45 or unrelated persons, who live together in the same dwelling unit or informal shelter, who are  
46 considered as one unit and share a cooking area.  
47  
48  
49

50 **Eligibility criteria:** Household members will be eligible to participate if they are  $\geq 1$  year of  
51 age and they (or their parent/guardian) provide consent to participate in the study.  
52  
53

54 Individuals who report current illness which is compatible with coronavirus disease (COVID-  
55 19), and those who report any of the following conditions will be excluded:  
56  
57  
58  
59

60 - Needle phobia

1  
2  
3 - Anaemia

4  
5  
6 - Skin condition affecting phlebotomy sites

7  
8  
9 - Bleeding disorder

10  
11 Additionally, individuals who cannot communicate verbally in Tetum, Portuguese or English  
12 will be excluded. Individuals under 1 year of age were excluded because maternal transfer  
13 of antibodies may affect interpretation of serology results and because this age group is  
14 more challenging to sample.  
15  
16  
17  
18  
19

20  
21  
22  
23 **Sample size:** A sample size was calculated with reference to the World Health Organization  
24 Reference Manual for Vaccination Coverage Cluster Surveys.<sup>7</sup> The investigator group  
25 considered which age groups would represent the most important sub-categories for  
26 estimating vaccine-preventable disease seroprevalence. This process took into account the  
27 local vaccine programme history (so serological findings can be related to estimated uptake),  
28 existing data on vaccine coverage including the referenced vaccine coverage survey (so that  
29 data from each source can be triangulated), programmatic considerations relating to  
30 potential intervention(s) in case immunity-gaps are identified, and various logistical and  
31 technical considerations (for example excluding individuals <1 year of age because the  
32 maternal transfer of antibodies would affect the interpretation and because this age group is  
33 more challenging to sample).  
34  
35  
36  
37  
38  
39  
40  
41  
42  
43  
44  
45  
46

47 VPD seroprevalence estimates which were considered of particular importance to specific  
48 age-strata include the following:  
49  
50

- 51  
52 - Measles in children under 5 years of age because they are most likely to suffer  
53 serious sequelae from infection when compared to other age groups<sup>8</sup> and between 5-  
54 14 years of age because outbreaks can occur and/or amplify in schools and other  
55 settings where groups of children from different households congregate.  
56  
57  
58  
59  
60

- Rubella in women 15-40 years of age because future pregnancies may be at risk of congenital rubella syndrome (CRS). It is anticipated that the rubella virus is circulating in Timor-Leste as there has only been a recent introduction of rubella vaccination and there is very little surveillance for CRS.
- SARS-CoV-2 in children 1-12 years of age because seropositivity is likely to represent naturally acquired infection as this group are not eligible for vaccination in Timor-Leste, which will indicate the extent of local transmission which has occurred.
- Hepatitis B (surface antibody, HBsAb and core antibody, HBcAb) in children under 5 and 5-14 years of age because hepatitis B birth vaccination was introduced approximately 5 years ago and comparison of these groups will give an indication of uptake.

Therefore, each of the following age groups was considered separate strata to provide age-specific seroprevalence results of sufficient precision: 1-4, 5-14, 15-24, 25-40, and 41+ years.

An effective sample size was calculated (i.e. the sample size required if undertaking a simple random sample) of 280 for each stratum. This used the World Health Organization Reference Manual for Vaccination Coverage Cluster Surveys<sup>7</sup> and was based upon an expected seroprevalence of 50% (because this provided the most conservative estimate) and a precision of +/- 6% (because this was precise enough to adequately inform decision-making and small enough to provide a feasible sample size for the financial and human resources available) for the 95% confidence interval.

Without local data on which to confidently base estimates of design effect, a conservative design effect of 4 was estimated, to ensure a sufficient sample to provide precise results. This provided a sample size for each strata of 1120 individuals, and a total survey sample size of 5600.

1  
2  
3 Based on national census data from 2015 the average number of individuals in each  
4 household was 5.7.<sup>9</sup> Population projections for 2021 estimated the proportion of individuals  
5 in Timor-Leste belonging to each age strata to be 9.6%, 24.0%, 21.9%, 20.2% and 21.5%,  
6 respectively. As such, the expected number of required households to sample sufficient  
7 individuals from the smallest age strata (1-4 years) was calculated as:  
8  
9  
10  
11  
12

$$1120 / (0.096 * 5.7) = 2047$$

13  
14  
15  
16  
17 Household response rate was assumed to be 85%, based on consensus opinion of local  
18 investigators who had been involved in previous community surveys in Timor-Leste. The  
19 number of households which will be targeted is therefore calculated as:  
20  
21  
22

$$2047 / 0.85 = 2408$$

23  
24  
25  
26  
27 This lead to 112 EAs being selected (with probability proportionate to municipality  
28 population), and 23 households being randomly selected from each EA.  
29  
30

31  
32 **Fieldwork procedures:** Municipalities will be visited sequentially depending on various  
33 logistical considerations including weather and road conditions, availability of staff, vehicles,  
34 and accommodation, and local municipal and health leader preference.  
35  
36  
37

38  
39 First, the study team leader will make a 'coordination visit' to the municipality during which  
40 they will explain the study procedures, receive permission to conduct the study, and discuss  
41 travel routes and gaining access to each EA with the following individuals:  
42  
43  
44

- 45 - Municipality Administrator (at Municipality Office; one per municipality)
- 46 - Director of Municipality Health Service (at Municipality Health Service Office; one per  
47 municipality)
- 48 - Sub-Municipality Administrator (at Administrative Post Offices; one for each sub-  
49 municipality being visited)
- 50 - Head of Community Health Centre (at Community Health Centre Office; one for each  
51 sub-municipality being visited)
- 52
- 53
- 54
- 55
- 56
- 57
- 58
- 59
- 60

- 1
- 2
- 3 - Chief of Suco (at Suco Office; 1 for every suco being visited)
- 4
- 5 - Commander of Police in Suco (at Suco Police Station; one per suco being visited, at
- 6 the discretion of the Chief of Suco)
- 7
- 8
- 9 - Chief of Aldeia (at Aldeia Office; one for every aldeia being visited)
- 10
- 11

12 If any of these individuals are not available in-person during the coordination visit attempts  
13 will be made to contact them by telephone or through WhatsApp.

14  
15  
16  
17 Secondly, a 'study visit' will be made by a whole study team, consisting of a team leader  
18 (usually non-clinical), three research nurses, and two drivers. Additionally, at the discretion  
19 of the Municipality Administrator, Sub-Municipality Administrator and/or Head of Community  
20 Health Centre, one or two local government representatives and/or one or two Community  
21 Health Centre representatives may join the study visits. It is anticipated that these individuals  
22 will primarily observe study procedures. Any involvement in participant recruitment, data  
23 collection or sample collection will be directly supervised by the appropriate study team  
24 member.

25  
26  
27  
28  
29  
30  
31  
32  
33  
34  
35 **Navigation and maps:** Selected households will be identified using electronic tablets which  
36 will have GPS capability and Google Earth® software installed. Keyhole Markup Language  
37 (KML) files with GPS coordinates for all selected households in each EA will be pre-loaded  
38 onto the tablets, such that they can be used without mobile/internet connectivity. KML files  
39 are generated in QGIS. Each household location is verified using a Google Satellite base  
40 map. Study teams will also carry printed colour copies of bespoke maps for each EA, which  
41 will show the location of households in relation to roads, paths, and landmarks. These will be  
42 produced using ArcMap™ 10.4.1 and will include ESRI imagery base map, showing the  
43 location of main roads and the selected households coded by letters. The standard  
44 operating procedure (SOP) for location of households is shown in appendix 1.

45  
46  
47  
48  
49  
50  
51  
52  
53  
54  
55  
56 **Data collection:** Study teams will approach the household occupants and introduce  
57 themselves. The occupants will be asked to identify an (acting) head-of-household. If this  
58  
59  
60

1  
2  
3 individual is not available (or if no occupants are present), the study team will arrange to  
4  
5 return twice to the household, and at least once on a separate day until a head-of-household  
6  
7 is present.  
8  
9

10 Data will be collected using structured interview-questionnaires. Responses will be entered  
11  
12 into electronic tablets which will have REDCap® installed. This is a secure web platform for  
13  
14 building and managing online databases which allows offline data entry<sup>10</sup>. Questionnaires  
15  
16 data will be uploaded to the REDCap® secure server hosted at Menzies School of Health  
17  
18 Research, Charles Darwin University, Darwin, Australia.  
19  
20

21 Three bespoke data collection tools have been developed (see appendices 2-4):  
22  
23

- 24 - Household questionnaire. This will be completed first. Demographic data on all  
25 household occupants (whether they are present at the time or not), will be collected  
26  
27 by interviewing the head-of-household.  
28  
29
- 30 - Participant questionnaire. This will be completed if/when any household occupants  
31  
32 agree to participate. Each will be assigned a unique identification number (participant  
33  
34 ID number) and relevant demographic, clinical and vaccine-related data will be  
35  
36 collected. Participants will not be asked to provide written documentation of vaccines  
37  
38 received because a low proportion of participants in the recent vaccine coverage  
39  
40 survey had retained this.<sup>1</sup>  
41  
42
- 43 - Unable to complete questionnaire. This will only be completed if the household  
44  
45 questionnaire cannot be completed (i.e. if a head-of-household was not present or  
46  
47 not willing to provide demographic data after 3 household visits). The reason for non-  
48  
49 completion will be recorded in free-text.  
50  
51

52 **Sample collection and handling:** Research nurses with training and experience in adult  
53  
54 and paediatric phlebotomy will collect primary blood samples using appropriate infection  
55  
56 prevention control procedures and safe management of sharps. Participants >5 years of  
57  
58 age will undergo venepuncture using either a standard hypodermic or a winged butterfly  
59  
60

1  
2  
3 needle with a syringe attached. Venous blood will then be injected directly into a gel serum  
4 separator tube (SST). Participants between 1-5 years of age (and those who do not consent  
5 to venepuncture but provide consent for a finger prick) may undergo capillary blood sampling  
6 through finger prick technique, in which case drops of blood will be applied directly to a  
7 paediatric gel SST. The method used will be determined on a case-by-case basis by the  
8 research nurse in the field. Table 2 shows sample volumes and collection techniques for  
9 participants in different age groups.  
10  
11  
12  
13  
14  
15  
16

17  
18 <Table 2 here>  
19

20  
21 Primary blood samples will be kept at ambient temperature out of direct sunlight and allowed  
22 to clot for a maximum of eight hours (i.e. one day of fieldwork). They will then undergo  
23 centrifugation at 1,500 RCF for ten minutes and the resulting separated serum samples will  
24 be kept at 4 degrees Celsius using a portable refrigerator with battery power backup. They  
25 will be transported to LNS within five days of sample collection and will undergo primary  
26 serological analysis within two weeks of sample collection.  
27  
28  
29  
30  
31  
32  
33

34 A secondary dried blood spot (DBS) sample will be created: For participants who undergo  
35 venepuncture, the last 300-500µL of venous blood in the syringe will be injected onto  
36 Whatman 903 filter paper marked with three 12mm diameter circles. For participants who  
37 undergo finger-prick, additional drops of capillary blood will be applied directly from the finger  
38 to the filter paper. Once the circles are saturated with blood (typically using 100-150µL blood  
39 for each circle), the filter paper will be dried at ambient temperature out of direct sunlight for  
40 four hours, then placed alongside a desiccant sachet into a plastic zip lock bag. The SOP for  
41 data and sample collection is shown in appendix 5.  
42  
43  
44  
45  
46  
47  
48  
49  
50

51  
52 **Sample analysis:** Primary (serum) samples from all participants will be tested at LNS for  
53 rubella IgG (quantitative; considered positive if >10 IU/mL), SARS-CoV-2 anti-spike IgG  
54 (qualitative), hepatitis B core antibody (HBcAb, qualitative) and hepatitis B surface antibody  
55 (HBsAb, quantitative, considered positive if >10 mIU/mL) using Ortho Clinic Diagnostics®  
56  
57  
58  
59  
60



1  
2  
3 chemiluminescent assays on the Vitros ECiQ® platform, and for measles IgG using the  
4 Eurimmun® ELISA assay (quantitative, positive if >120IU/L). For quantitative assays,  
5 serological cut-offs which have been most commonly shown to correlate with protection from  
6 infection and/or those which are conventionally used in serosurveys and/or assessment of  
7 immunity have been chosen.<sup>11-13</sup> Where data are somewhat conflicting, there is lack of  
8 consensus supporting a correlate-of-protection, or considerable inter-assay variability in  
9 quantitative determination has been observed, secondary (exploratory) analyses using  
10 alternative cut-offs may also be undertaken (for example 200IU/L and/or 250IU/L for  
11 measles IgG).<sup>3</sup>

12  
13  
14  
15  
16  
17  
18  
19  
20  
21  
22  
23 Additionally, samples from participants residing in Dili Municipality (excluding Atauro) will be  
24 tested for hepatitis B surface antigen (HBsAg, qualitative). This marker denotes active  
25 hepatitis B infection which may have significant health implications and will therefore only be  
26 tested in Dili municipality where there is a hepatology clinic in which participants can receive  
27 further assessment and follow-up. Any samples which are positive for HBsAg will also be  
28 tested for hepatitis B envelope antigen (HBeAg, qualitative) and hepatitis B envelope  
29 antibody (HBeAb, qualitative) testing using Ortho Clinic Diagnostics chemiluminescent  
30 assays on the Vitros ECiQ platform, and hepatitis B viral load (HBVL, quantitative) using the  
31 Cepheid® assay on the GeneXpert platform. All testing will be carried out according to  
32 manufacturers' instructions and cited serological cut-off values. For qualitative assays,  
33 samples with borderline/indeterminate results will be considered negative, apart from HBsAg  
34 where the test will be repeated and both results reviewed alongside other hepatitis B results  
35 by an appropriately qualified clinical member of the research team who will decide whether  
36 the participant should be referred to the hepatology clinic for repeat sampling and clinical  
37 assessment.

38  
39  
40  
41  
42  
43  
44  
45  
46  
47  
48  
49  
50  
51  
52  
53  
54  
55 Assays have been chosen based on their previous performance in seroprevalence studies,  
56 immediate availability for shipment to Timor-Leste, and local laboratory expertise in  
57 operating these types of assays (with ongoing capacity building for serological testing in  
58  
59  
60



1  
2  
3 LNS). The measles IgG assay is quantitative and calibrated against a World Health  
4 Organisation (WHO) Standard (NIBSC, Anti-Measles serum, 3rd International Standard  
5 97/648). It showed acceptable performance when assessed in a recent study of  
6 concordance between commercially available assays (concordance for samples with  
7 positive/negative status = 90%/100%)<sup>14</sup>. The rubella IgG assay is quantitative and calibrated  
8 against a Centers for Disease Control and Prevention (CDC) standard (Low Titer Rubella  
9 Standard) and a World Health Organization (WHO) standard (1st International Rubella IgG  
10 Standard). While concerns around standardisation of rubella IgG assays are noted<sup>15</sup>, this  
11 assay showed acceptable performance when assessed in a recent study of concordance  
12 between automated immunoassays (concordance for samples with negative/positive status  
13 = 90.6%/91.1%)<sup>16</sup>. The hepatitis B surface antibody assay is quantitative and showed high  
14 sensitivity (97.1%) and specificity (97.9%) when evaluated in a panel of sera from healthcare  
15 workers and patients<sup>17</sup>. The SARS-CoV-2 anti-spike IgG assay has high sensitivity (93.3%,  
16 >21 days post infection) and specificity (100%), which compares favourably to many other  
17 available immunoassays<sup>18</sup>, and has been used in several serological surveillance studies<sup>19-  
18 21</sup>.

19  
20  
21  
22  
23  
24  
25  
26  
27  
28  
29  
30  
31  
32  
33  
34  
35  
36  
37 **Provision of results to participants:** The majority of testing in this study will be for  
38 antibodies against VPDs (either IgG or total antibody). Results will therefore only indicate  
39 whether an individual has been previously infected and/or vaccinated against each disease  
40 at some time in the past and will not provide information on current infection. While  
41 seronegative participants may be at risk of future infections (and may benefit from  
42 vaccination), individual notification of results and provision of vaccines to all seronegative  
43 study participants is not considered feasible in this large cross-sectional study. Instead, all  
44 participants will be advised of the benefits of routine vaccination and immunisation clinics in  
45 their area, as well as on any forthcoming SIAs which may occur as a result of this study.  
46  
47  
48  
49  
50  
51  
52  
53  
54  
55  
56  
57 In addition to antibody tests, serum from participants within Dili Municipality (excluding  
58 Atauro) will be tested for HBsAg. This marker denotes active hepatitis B infection which may  
59  
60

1  
2  
3 have significant health implications and will therefore only be tested in Dili municipality where  
4 there is a hepatology clinic in which participants can be seen. Participants who test positive  
5 for HBsAg will be contacted by telephone to discuss their results and will be offered  
6 assessment including biochemical and radiological investigation of liver function and  
7 consideration of antiviral treatment in-line with international clinical guidelines<sup>22</sup>. This  
8 approach has been successful and has been acceptable to participants in a smaller  
9 serological surveillance study including hepatitis B testing among healthcare workers in  
10 Timor-Leste<sup>6</sup>.

11  
12  
13  
14  
15  
16  
17  
18  
19  
20  
21 **Sample storage:** Primary (serum) samples will be stored at -80 degrees Celsius and  
22 secondary (DBS) samples will be stored at 4 degrees Celsius at LNS for 10 years. These  
23 may undergo additional serological analyses to further investigate infectious disease sero-  
24 epidemiology in Timor-Leste and/or validating existing and novel serological assays for  
25 infectious diseases, pending successful funding application and appropriate ethical approval.

26  
27  
28  
29  
30  
31  
32 **Fieldworker training:** Field workers will undergo one week of formal in-person training in  
33 study procedures. Days 1-2 will be classroom based and will include sessions on 'the study  
34 protocol', 'field team composition' (structure, members, responsibilities), 'logistics,  
35 technology and map reading', 'recruitment and consent', and 'collection of data using  
36 interview questionnaires'. Days 3-5 will be practical and will include demonstrations and  
37 training in adult and paediatric phlebotomy and finger-prick techniques, infection prevention  
38 control procedures, and the use of personal protective equipment (PPE). These skills will be  
39 assessed formatively throughout the training and summatively using pre- and post- session  
40 assessments. Training will be delivered by PA, JF, NSSF and/or JY who are clinicians with  
41 experience of epidemiological and clinical research in Timor-Leste.

42  
43  
44  
45  
46  
47  
48  
49  
50  
51  
52  
53 **Laboratory team training:** Laboratory training will occur in the Serology Department of  
54 LNS. Training will be delivered by PA and TO who have significant experience with ELISA  
55 and chemiluminescent techniques, including in Timor-Leste. The focus of training will be on  
56  
57  
58  
59  
60

1  
2  
3 assay verification and quality assurance, as well as procedures for sample processing,  
4 analysis and storage.  
5  
6  
7

8 **Data storage and handling:** Field data will be stored in the REDCap® secure server hosted  
9 at Menzies School of Health Research, Charles Darwin University, Darwin, Australia, until  
10 analysis. Laboratory data (i.e. serology worksheets and results) will be stored on the  
11 password-protected LNS laboratory information system (SchuyLab®) until analysis.  
12  
13 Deidentified field and laboratory datasets will be downloaded and stored as password-  
14 protected databases on computer(s) at Menzies School of Health Research, Timor-Leste  
15 Office, Dili, Timor-Leste, where they will be linked using participant ID numbers and  
16 analysed. Only named investigators who are working directly on this project will have  
17 access to data.  
18  
19  
20  
21  
22  
23  
24  
25  
26  
27

28 **Statistical analysis plan:** Primary data analysis will occur at the end of the study, once all  
29 fieldwork is complete and all samples have been analysed. Interim analyses may also occur  
30 upon reasonable request from the Timor-Leste MoH or other partner organisation. As a  
31 multi-stage sampling survey design will be used to select participants, sampling weights will  
32 be calculated at each stage. These weights will reflect a participant's inverse probability of  
33 selection at a particular stage, be it at the EA level, the household level or the householder  
34 level. Furthermore, these weights will subject to both non-response adjustment and finite  
35 population correction. Measures of prevalence will be age-standardised using the standard  
36 population for Asia given by the International Network for the Demographic PNGIMR 2018,  
37 Papua New Guinea MIS 2016-2017.<sup>23</sup> To account for this design, the 'svy' data commands  
38 in Stata (version 16, StataCorp, College Station, TX, USA) will be used for ally analyses.  
39  
40 Characteristics of participants will be summarised using weighted descriptive statistics.  
41  
42 Frequencies and proportions will be used to describe categorical distributions, whilst means  
43 and standard deviations will be used to describe continuous variables. In the presence of  
44 non-normality, medians and interquartile ranges will be reported. Univariable and  
45 multivariable binary logistic regression will be undertaken to model age, the independent  
46  
47  
48  
49  
50  
51  
52  
53  
54  
55  
56  
57  
58  
59  
60

1  
2  
3 variables of primary interest with the five VPD outcomes. In addition to this variable, other  
4 variables known to be risk factors of VPD, such as sex and travel history, will be subjected to  
5 a manual backward stepwise procedure. Variables with a p-value  $\geq 0.20$  will not be retained.  
6  
7 The Hosmer-Lemeshow test will be used to test the goodness of fit of each multivariable  
8 model. A p-value  $< 0.05$  will be considered statistically significant with Odds Ratios (OR),  
9 95% confidence intervals (CI) and p-values calculated for age and sex.  
10  
11  
12  
13  
14  
15

16 **Timing:** This study will begin in January 2022 and is expected to end in December 2023.  
17  
18

19 **Patient and public involvement:** Engagement with members of the public, local  
20 administrative and health leaders has been central to the design of this study. It has resulted  
21 in procedures which will maximise participant choice and ensure any clinically relevant  
22 diagnoses made during the study are followed-up.  
23  
24  
25  
26  
27  
28  
29  
30

## 31 **ETHICS AND DISSEMINATION**

32

33 **Informed consent:** Each prospective participant will receive a participant information sheet  
34 which will be printed in English and Tetum (appendices 6 and 7). They will also be provided  
35 with a verbal explanation of the study rationale and procedures. This will include potential  
36 risks and benefits of sample collection, specific tests which their sample will undergo, the  
37 fact that they will not receive notification of any results (with the exception of a positive  
38 HBsAg, tested in Dili Municipality only) and the possibility that their sample will undergo  
39 additional analyses for evidence of communicable diseases during the next 10 years. They  
40 will be given up to 30 minutes to ask questions and decide whether they wish to participate,  
41 and will then provide informed, written consent by signing a consent form (appendices 6 and  
42 7). For individuals under 16 years of age, verbal assent will be sought, in addition to written  
43 consent from their parent or guardian. This study has received ethical approval from the  
44 Research Ethics and Technical Committee of the Instituto Nacional da Saúde, Timor-Leste  
45 (Reference: 875 MS-INS/DGE/IX/2021) and the Human Research Ethics Committee of the  
46  
47  
48  
49  
50  
51  
52  
53  
54  
55  
56  
57  
58  
59  
60

1  
2  
3 Northern Territory Department of Health and Menzies School of Health Research, Australia  
4  
5 (Reference: 2021-4064).  
6  
7

8 **Protocol amendments:** Any modifications to the protocol which may impact on the conduct  
9  
10 of the study will be documented in a formal protocol amendment and approved by both  
11  
12 Research Ethics Committees prior to implementation of the changes. The Research Ethics  
13  
14 Committees will also be notified of any minor corrections/clarifications or administrative  
15  
16 changes to the protocol, which will be documented in a protocol amendment letter.  
17  
18

19 **Adverse events:** Data on adverse events will be collected throughout the study, with  
20  
21 participants (or their parent/guardian) being informed of the risks of phlebotomy (including  
22  
23 bruising, bleeding and infection), how to recognise these, and how to contact the study team  
24  
25 if they occur. Adverse events will be reported to the Principal Investigator. In cases where  
26  
27 infection or any other serious adverse event has occurred, the Principle Investigator will  
28  
29 conduct a review of the study visit and decide whether any phlebotomy retraining or change  
30  
31 in practice is required and/or whether recruitment to the study should be paused.  
32  
33

34 **Strengths and limitations:** This project will produce accurate, nationally representative  
35  
36 seroprevalence data for multiple VPDs and relevant age-groups, which has not been  
37  
38 achieved in Timor-Leste previously. It has been co-designed by investigators at Menzies  
39  
40 School of Health Research (Timor-Leste Office), the National Centre for Immunisation  
41  
42 Research and Surveillance (Australia), the MoH (Timor-Leste), LNS (Timor-Leste), and the  
43  
44 WHO (Timor-Leste Office) according to local research and public health priorities. This will  
45  
46 allow immediate translation of findings into public health policy (including potentially changes  
47  
48 to routine immunisation service delivery and/or plans for SIAs). Additionally, the survey will  
49  
50 derive a national asset of serum and dried blood spot (DBS) samples which can be used for  
51  
52 further investigation of infectious disease sero-epidemiology in Timor-Leste and/or validating  
53  
54 existing and novel serological assays for infectious diseases.<sup>24–28</sup> Engagement with local  
55  
56 administrative and health leaders and maximisation of participant choice and welfare have  
57  
58  
59  
60

1  
2  
3 been central to the design, including ensuring all individuals diagnosed with active hepatitis  
4 B during the study have access to appropriate further investigation and follow-up.  
5  
6

7  
8 Limitations include the collection of only a small number of VPD-related clinical variables.  
9

10 This decision was taken because the investigator group felt that conducting prolonged  
11 interview questionnaires including potentially sensitive health information may make some  
12 potential participants feel uncomfortable, and as such ease-of-questionnaire-administration  
13 and survey acceptability +/- uptake was prioritised. However, interpretation of serology can  
14 be affected by underlying immunosuppressive conditions (for example), and therefore  
15 absence of these data may affect study findings. The prevalence of such conditions in  
16 Timor-Leste is likely to be low, and therefore only to be a minor limitation to our study:  
17 Prevalence of HIV in Timor-Leste is estimated to be 0.2% in those aged 15-49 years, and  
18 chemotherapy for malignant conditions (except for corticosteroids) is largely unavailable.  
19 Another limitation is the exclusion of individuals who report current illness which is  
20 compatible with COVID-19. It is possible that this could lead to underestimation of SARS-  
21 CoV-2 seroprevalence. However, since acute illness is relatively short lived (<2 weeks for  
22 the majority of people) when compared to the duration of anti-S seropositivity (typically many  
23 months), this effect will likely be low, but will depend on the timing of fieldwork in relation to  
24 any local outbreaks of SARS-CoV-2 (i.e. the prevalence of acute infection in relation to  
25 overall seroprevalence, at the time of survey). A final limitation relates to the choice of  
26 serological targets, which (except for hepatitis B) will not differentiate vaccine- from infection-  
27 derived immunity. For example, SARS-CoV-2 anti-S antibodies will be tested, but not anti-  
28 nucleocapsid antibodies. This decision was taken because targets related to population  
29 immunity (i.e. those correlating with protection) were considered most important, regardless  
30 of its source, and additional targets would be costly. Additionally, some whole-virus  
31 vaccines will likely be used in Timor-Leste, which cannot be differentiated with such  
32 methods.  
33  
34  
35  
36  
37  
38  
39  
40  
41  
42  
43  
44  
45  
46  
47  
48  
49  
50  
51  
52  
53  
54  
55  
56  
57  
58  
59  
60

1  
2  
3 Risks include the ongoing global outbreak of SARS-CoV-2 (which may delay/prohibit study  
4 visits), disruption of supply of field and laboratory consumables to Timor-Leste (which may  
5 delay/increase the cost of laboratory analysis), natural disasters such as flooding, and  
6 potential unwillingness of individuals to participate in provision of data and/or samples (which  
7 may affect recruitment, potentially disproportionately among children).  
8  
9  
10  
11  
12

13  
14 **Dissemination / knowledge transition plan:** After each interim analyses, results will be  
15 shared with Timor-Leste MoH partners in the form of an oral presentation and in a written  
16 report. Following completion of the study, results will be shared with Timor-Leste MoH, other  
17 partner organisations, and local administrative and health leaders for EAs where the study  
18 took place (Municipality Administrators, Directors of Municipality Health Services, Sub-  
19 Municipality Administrators, Heads of Community Health Centres, Chiefs of Sucos, Chief of  
20 Aldeia), in the form of a written report. Results will also be submitted for publication in peer-  
21 reviewed journals and presented at relevant international conferences.  
22  
23  
24  
25  
26  
27  
28  
29  
30  
31  
32  
33  
34  
35  
36

### 37 **AUTHOR CONTRIBUTIONS**

38  
39  
40 PA, SLS, NM, SA, NS, CF, FNM, NSSF, KM, JY and JRF conceived the study. PA, SLS,  
41 NM, MYT, SA, ADKD, NS, LA, CF, FNM, CAG reviewed existing literature and performed  
42 situation analysis. PA, MYT, SA, VS, LA, CAG, ICB determined the fieldwork procedures  
43 and designed data collection tools. PA, NG, TO, NS, ES, LA, ICB determined laboratory  
44 procedures. PA, MD, ADKD, NS, NSSF drafted the data and statistical analysis plan. NM,  
45 MYT, SA, NS, CF, FNM, CAG planned community engagement, obtained ethical approval  
46 and lead other regulatory aspects of the study. All authors reviewed and commented on the  
47 final manuscript.  
48  
49  
50  
51  
52  
53  
54  
55  
56  
57  
58  
59  
60



## COMPETING INTERESTS

All authors declare no competing interests for this study.

## FUNDING STATEMENT

This work was supported by the Department for Foreign Affairs and Trade, Australian Government (Complex Grant Agreement Number 75889).

## REFERENCES

- 1 WHO. Timor-Leste: WHO and UNICEF estimates of immunization coverage : 2019 revision. 2021; : 1–18.
- 2 Plotkin SA. Vaccines: correlates of vaccine-induced immunity. *Clin Infect Dis* 2008; **47**: 401–9.
- 3 Bolotin S, Hughes SL, Gul N, *et al*. What Is the Evidence to Support a Correlate of Protection for Measles? A Systematic Review. *J Infect Dis* 2020; **221**: 1576–83.
- 4 Plotkin SA. Correlates of protection induced by vaccination. *Clin Vaccine Immunol* 2010; **17**: 1055–65.
- 5 Arkell P, Gusmao C, Sheridan SL, *et al*. Serological surveillance of healthcare workers to evaluate natural infection- and vaccine-derived immunity to SARS-CoV-2 during an outbreak in Dili, Timor-Leste. *Int J Infect Dis* 2022; **119**: 80–6.
- 6 Gusmao C, Tanesi MY, Gomes N, *et al*. Seroprevalence and Prevention of Hepatitis B, Measles, and Rubella Among Healthcare Workers in Dili, Timor-Leste. *SSRN Electron J* 2022. DOI:10.2139/SSRN.4186798.
- 7 Organization WH. World Health Organization vaccination coverage cluster surveys:



- 1  
2  
3 reference manual. World Health Organization, 2018.  
4  
5  
6 8 Moss WJ. Measles. *Lancet* 2017; **390**: 2490–502.  
7  
8  
9 9 Direccao Geral de Estatistica G of T-L. Population and Housing Census 2015:  
10 Preliminary Results. .  
11  
12  
13 10 REDCap. <https://www.project-redcap.org/> (accessed Aug 25, 2022).  
14  
15  
16 11 World Health Organisation. WHO Immunological Basis for Immunization Series  
17 Module 7: Measles. In: Immunological basis for immunization series. 2020: 18.  
18  
19  
20  
21 12 World Health Organization. The Immunological Basis for Immunization Series Module  
22 11: Rubella. 2008  
23  
24  
25 [https://apps.who.int/iris/bitstream/handle/10665/43922/9789241596848\\_eng.pdf;jsess](https://apps.who.int/iris/bitstream/handle/10665/43922/9789241596848_eng.pdf;jsessionid=B50F1DE9E021388B2DBB9C7A8B76F6E5?sequence=1)  
26  
27 [ionid=B50F1DE9E021388B2DBB9C7A8B76F6E5?sequence=1](https://apps.who.int/iris/bitstream/handle/10665/43922/9789241596848_eng.pdf;jsessionid=B50F1DE9E021388B2DBB9C7A8B76F6E5?sequence=1) (accessed Sept 13,  
28  
29 2022).  
30  
31  
32 13 World Health Organization. The Immunological Basis for Immunization Series Module  
33 22: Hepatitis B. 2011.  
34  
35  
36  
37 14 Tischer A, Andrews N, Kafatos G, *et al.* Standardization of measles, mumps and  
38 rubella assays to enable comparisons of seroprevalence data across 21 European  
39 countries and Australia. *Epidemiol Infect* 2007; **135**: 787–98.  
40  
41  
42  
43  
44 15 Dimech W, Grangeot-Keros L, Vauloup-Fellous C. Standardization of Assays That  
45 Detect Anti-Rubella Virus IgG Antibodies. 2015. DOI:10.1128/CMR.00045-15.  
46  
47  
48  
49 16 Dimech W, Arachchi N, Cai J, Sahin T, Wilson K. Investigation into Low-Level Anti-  
50 Rubella Virus IgG Results Reported by Commercial Immunoassays. 2013.  
51  
52  
53 DOI:10.1128/CVI.00603-12.  
54  
55  
56 17 Huzly D, Schenk T, Jilg W, Neumann-Haefelin D. Comparison of nine commercially  
57 available assays for quantification of antibody response to hepatitis B virus surface  
58  
59  
60

- 1  
2  
3 antigen. *J Clin Microbiol* 2008; **46**: 1298–306.  
4  
5  
6 18 Harritshøj LH, Gybel-Brask M, Afzal S, *et al*. Comparison of 16 Serological SARS-  
7  
8 CoV-2 Immunoassays in 16 Clinical Laboratories. *J Clin Microbiol jcm.asm.org* 2021;  
9  
10 **59**: 2596–616.  
11  
12  
13 19 Santarelli A, Lalitsasivimol D, Bartholomew N, *et al*. The seroprevalence of sars-cov-2  
14  
15 in a rural southwest community. *J Am Osteopath Assoc* 2021; **121**: 199–210.  
16  
17  
18 20 Ng DL, Goldgof GM, Shy BR, *et al*. SARS-CoV-2 seroprevalence and neutralizing  
19  
20 activity in donor and patient blood. *Nat Commun* 2020; **11**. DOI:10.1038/s41467-020-  
21  
22 18468-8.  
23  
24  
25 21 Jin DK, Nesbitt DJ, Yang J, *et al*. Seroprevalence of anti-SARS-CoV-2 antibodies in a  
26  
27 cohort of New York City metro blood donors using multiple SARS-CoV-2 serological  
28  
29 assays: Implications for controlling the epidemic and ‘Reopening’. *PLoS One* 2021;  
30  
31 **16**: e0250319.  
32  
33  
34 22 Lampertico P, Agarwal K, Berg T, *et al*. EASL 2017 Clinical Practice Guidelines on the  
35  
36 management of hepatitis B virus infection. *J Hepatol* 2017; **67**: 370–98.  
37  
38  
39 23 Sankoh O, Sharrow D, Herbst K, *et al*. The INDEPTH standard population for low-  
40  
41 and middle-income countries, 2013. *Glob Health Action* 2014; **7**.  
42  
43 DOI:10.3402/gha.v7.23286.  
44  
45  
46 24 Arkell P, Angelina J, do Carmo Vieira A, *et al*. Integrated serological surveillance of  
47  
48 acute febrile illness in the context of a lymphatic filariasis survey in Timor-Leste: a  
49  
50 pilot study using dried blood spots. *Trans R Soc Trop Med Hyg* 2021; published online  
51  
52 Nov 27. DOI:10.1093/TRSTMH/TRAB164.  
53  
54  
55 25 Basile AJ, Horiuchi K, Panella AJ, *et al*. Multiplex microsphere immunoassays for the  
56  
57 detection of IgM and IgG to arboviral diseases. *PLoS One* 2013; **8**.  
58  
59 DOI:10.1371/JOURNAL.PONE.0075670.  
60

- 1  
2  
3 26 Tyson J, Tsai WY, Tsai JJ, *et al.* A high-throughput and multiplex microsphere  
4 immunoassay based on non-structural protein 1 can discriminate three flavivirus  
5 infections. *PLoS Negl Trop Dis* 2019; **13**. DOI:10.1371/JOURNAL.PNTD.0007649.  
6  
7  
8  
9  
10 27 Fornace KM, Senyonjo L, Martin DL, *et al.* Characterising spatial patterns of  
11 neglected tropical disease transmission using integrated sero-surveillance in Northern  
12 Ghana. *PLoS Negl Trop Dis* 2022; **16**. DOI:10.1371/JOURNAL.PNTD.0010227.  
13  
14  
15  
16  
17 28 Tetteh KKA, Wu L, Hall T, *et al.* Optimisation and standardisation of a multiplex  
18 immunoassay of diverse *Plasmodium falciparum* antigens to assess changes in  
19 malaria transmission using sero-epidemiology. *Wellcome open Res* 2020; **4**.  
20 DOI:10.12688/WELLCOMEOPENRES.14950.2.  
21  
22  
23  
24  
25  
26  
27  
28  
29  
30  
31  
32  
33  
34  
35  
36  
37  
38  
39  
40  
41  
42  
43  
44  
45  
46  
47  
48  
49  
50  
51  
52  
53  
54  
55  
56  
57  
58  
59  
60

1  
2  
3  
4  
5  
6  
7  
8  
9  
10  
11  
12  
13  
14  
15  
16  
17  
18  
19  
20  
21  
22  
23  
24  
25  
26  
27  
28  
29  
30  
31  
32  
33  
34  
35  
36  
37  
38  
39  
40  
41  
42  
43  
44  
45  
46  
47  
48  
49  
50  
51  
52  
53  
54  
55  
56  
57  
58  
59  
60

For peer review only

**Table 1: Routine Timor-Leste vaccination schedule in 2022 and estimated coverage in 2018**

| Vaccine        | Recommended age of administration | Introduced | Crude estimated coverage (2018 national vaccine coverage survey) (95%CI)* (%) | Valid estimated coverage (2018 national vaccine coverage survey) (95%CI)** (%) |
|----------------|-----------------------------------|------------|-------------------------------------------------------------------------------|--------------------------------------------------------------------------------|
| BCG            | At birth                          | Pre 1999   | 94.7 (91.7-97.0)                                                              | 68.8 (61.3-75.0)                                                               |
| HepB0          |                                   | 2016       | 66.2 (58.5-73.0)                                                              | 55.0 (46.9-63.0)                                                               |
| bOPV0          |                                   | 2016       | 80.4 (74.0-86.0)                                                              | 60.8 (52.2-69.0)                                                               |
| DTwP-Hib-HepB1 | 6 weeks                           | 2007       | 91.8 (87.8-95.0)                                                              | 74.6 (68.4-80.0)                                                               |
| bOPV1          |                                   | 2016       | 91.8 (87.8-95.0)                                                              | 75.5 (69.4-81.0)                                                               |
| RV1            |                                   | 2019       | Not part of routine vaccination in 2018                                       |                                                                                |
| DTwP-Hib-HepB2 | 10 weeks                          | 2007       | 87.4 (82.6-91.0)                                                              | 72.8 (66.7-78.0)                                                               |
| bOPV2          |                                   | 2016       | 87.8 (83.0-91.0)                                                              | 73.2 (66.9-79.0)                                                               |
| RV2            |                                   | 2019       | Not part of routine vaccination in 2018                                       |                                                                                |
| DTwP-Hib-HepB3 | 14 weeks                          | 2007       | 83.3 (78.0-87.0)                                                              | 75.0 (68.8-80.0)                                                               |
| bOPV3          |                                   | 2016       | 83.3 (78.0-87.0)                                                              | 75.3 (69.0-81.0)                                                               |
| RV3            |                                   | 2019       | Not part of routine vaccination in 2018                                       |                                                                                |
| IPV            |                                   | 2016       | 80.6 (74.1-86.0)                                                              | 71.5 (64.6-77.0)                                                               |
| MR1            | 9 months                          | 2016       | 77.3 (71.5-82.0)                                                              | 60.5 (54.0-67.0)                                                               |
| DTwP4          | 18 months                         | 2016       | 54.8 (46.5-63.0)                                                              | 16.0 (12.1-21.0)                                                               |
| MR2            |                                   | 2016       | 54.4 (46.1-62.0)                                                              | 12.5 (9.0-17.0)                                                                |
| DT             | 6 year or school entry            | 2016       | Not measured in 2018 survey                                                   |                                                                                |
| TT1-5          | Unimmunised pregnant women        | Pre 1999   | 68.2 (62.4-74.0)                                                              |                                                                                |

|            |                                           |                                       |                                         |  |
|------------|-------------------------------------------|---------------------------------------|-----------------------------------------|--|
| SARS-CoV-2 | Adults and children above 12 years of age | Adults: Apr 2021<br>Children Oct 2021 | Not part of routine vaccination in 2018 |  |
|------------|-------------------------------------------|---------------------------------------|-----------------------------------------|--|

Abbreviations: BCG = bacillus Calmette-Guérin; HepB = hepatitis B; bOPV0 = bivalent oral polio vaccine; DTwP-Hib-HepB = diphtheria, tetanus, pertussis, hepatitis B and Haemophilus influenzae type B; RV = rotavirus vaccine; IPV = inactivated poliovirus vaccine; MR = measles and rubella vaccine; DT - diphtheria and tetanus vaccine; TT - tetanus toxoid vaccine.

\*crude coverage is defined as all doses, whether valid or not, by any documented evidence or verbal history at the time of the survey.

\*\*valid coverage includes only the doses of vaccines that were given on or after the minimum date of eligibility and requires a vaccination record (either home based or health facility) with a documented date.

1  
2  
3  
4  
5  
6  
7  
8  
9  
10  
11  
12  
13  
14  
15  
16  
17  
18  
19  
20  
21  
22  
23  
24  
25  
26  
27  
28  
29  
30  
31  
32  
33  
34  
35  
36  
37  
38  
39  
40  
41  
42  
43  
44  
45  
46  
47  
48  
49  
50  
51  
52  
53  
54  
55  
56  
57  
58  
59  
60

For peer review only

**Table 2: Sample volumes and collection techniques for primary sample collection by age group**

| Age group  | Method of blood collection | Equipment                                                                      | Collection container    | Target sample volume |
|------------|----------------------------|--------------------------------------------------------------------------------|-------------------------|----------------------|
| 1-5 years  | Venepuncture*              | 23G butterfly needle, venous blood aspirated into 5ml syringe                  | 5ml SST tube            | 5ml                  |
|            | Finger prick*              | Lancet, capillary blood drops transferred directly into collection tube        | 2ml paediatric SST tube | 2ml                  |
| 6-15 years | Venepuncture               | 21-23G needle or 23G butterfly needle, venous blood aspirated into 5ml syringe | 5ml SST tube            | 5ml                  |
| Adults     | Venepuncture               | 21-23G needle, venous blood aspirated into 10ml syringe                        | 2x 5ml SST tube         | 10ml                 |

Abbreviations: SST = serum separator tube

\*Determined in field by phlebotomist on case-by-case basis



**APPENDICIES**

Appendix 1: Standard operating procedure for location of households

Appendix 2: Household questionnaire

Appendix 3: Participant questionnaire

Appendix 4: Did not complete questionnaire

Appendix 5: Standard operating procedure for data and sample collection

Appendix 6: Participant information sheet and consent form (within Dili)

Appendix 7: Participant information sheet and consent form (outside Dili)

**FIGURE LEGENDS**

Figure 1: Map of Timor-Leste showing enumeration areas (EAs) within municipalities

**ACKNOWLEDGMENTS**

Mr Trevor Clifford



Figure 1: Map of Timor-Leste showing enumeration areas (EAs) within municipalities

159x112mm (220 x 220 DPI)

### VASINA fieldwork SOP – location of households

1. **Navigate to household using GPS device and printed maps**
  - Make sure you identify the exact house (do not accept another household nearby)
2. **If at least one adult household member is present, move to *Data and Sample Collection SOP***
3. **If the household was found, but there are no household members present (or if one or more household members are missing):**
  - Arrange and conduct a second and third visit. At least one of these should be on a different day.
  - If there are no household members present on all three visits, complete the '*Unable to Complete Questionnaire*' on RedCap
  - Do not find another household to replace this one
4. **If the household was found, but it looks derelict**
  - Fill out the '*Unable to Complete Questionnaire*' on RedCap
  - Choose the nearest occupied house and offer study participation to these occupants instead. If there are two equidistant houses, choose the one on the Left. When collecting data for the new household, add "B" to the end of the household number (e.g. "12345B")
5. **If the household cannot be found**
  - Fill out the '*Unable to Complete Questionnaire*' on RedCap
  - Make sure you enter the reason that the household cannot be found
  - Do not find another household to replace this one

# Household Questionnaire

Record ID \_\_\_\_\_

Household number \_\_\_\_\_

Númeru Uma-kain \_\_\_\_\_

How many people currently live in this household?

- 1
- 2
- 3
- 4
- 5
- 6
- 7
- 8
- 9
- 10
- 11
- 12
- 13
- 14
- 15
- 16
- 17
- 18
- 19
- 20

Ema nain hira mak agora dadauk hela iha uma-kain ida-ne'e?

(If the household has more than 20 mebers, fill out a second Household Questionnaire / Karik iha uma-kain ida nia membru barak liu ema 20, preenxe fali iha kuestionariu uma-kain segundu)

Gender of household member 1

- Male / Mane
- Female / Feto

Jeneru membru uma-kain 1

Age of household member 1

Idade membru uma-kain 1

(If unsure, please estimate age (to the nearest 10 years))

Adult or child?

- Adult
  - Child
- (Only fill this out if age cannot be estimated)

Study ID number of household member 1

Númeru ID estudu nian ba membru uma-kain 1

( Only fill if he/she chooses to participate / Preenxe deit kuandu nia hili atu partisipa)

Gender of household member 2

- Male / Mane
- Female / Feto

Jeneru membru uma-kain 2

|    |                                            |                                                                                            |
|----|--------------------------------------------|--------------------------------------------------------------------------------------------|
| 1  | Age of household member 2                  |                                                                                            |
| 2  |                                            |                                                                                            |
| 3  | Idade membru uma-kain 2                    | (If unsure, please estimate age (to the nearest 10 years))                                 |
| 4  |                                            |                                                                                            |
| 5  |                                            |                                                                                            |
| 6  | Adult or child?                            | <input type="radio"/> Adult                                                                |
| 7  |                                            | <input type="radio"/> Child                                                                |
| 8  |                                            | (Only fill this out if age cannot be estimated)                                            |
| 9  |                                            |                                                                                            |
| 10 | Study ID number of household member 2      |                                                                                            |
| 11 |                                            |                                                                                            |
| 12 | Númeru ID estudu nian ba membru uma-kain 2 | ( Only fill if he/she chooses to participate / Preenxe deit kuandu nia hili atu partisipa) |
| 13 |                                            |                                                                                            |
| 14 |                                            |                                                                                            |
| 15 |                                            |                                                                                            |
| 16 | Gender of household member 3               | <input type="radio"/> Male / Mane                                                          |
| 17 |                                            | <input type="radio"/> Female / Feto                                                        |
| 18 | Jeneru membru uma-kain 3                   |                                                                                            |
| 19 |                                            |                                                                                            |
| 20 | Age of household member 3                  |                                                                                            |
| 21 |                                            |                                                                                            |
| 22 | Idade membru uma-kain 3                    | (If unsure, please estimate age (to the nearest 10 years))                                 |
| 23 |                                            |                                                                                            |
| 24 |                                            |                                                                                            |
| 25 | Adult or child?                            | <input type="radio"/> Adult                                                                |
| 26 |                                            | <input type="radio"/> Child                                                                |
| 27 |                                            | (Only fill this out if age cannot be estimated)                                            |
| 28 |                                            |                                                                                            |
| 29 | Study ID number of household member 3      |                                                                                            |
| 30 |                                            |                                                                                            |
| 31 | Númeru ID estudu nian ba membru uma-kain 3 | ( Only fill if he/she chooses to participate / Preenxe deit kuandu nia hili atu partisipa) |
| 32 |                                            |                                                                                            |
| 33 |                                            |                                                                                            |
| 34 |                                            |                                                                                            |
| 35 | Gender of household member 4               | <input type="radio"/> Male / Mane                                                          |
| 36 |                                            | <input type="radio"/> Female / Feto                                                        |
| 37 | Jeneru membru uma-kain 4                   |                                                                                            |
| 38 |                                            |                                                                                            |
| 39 | Age of household member 4                  |                                                                                            |
| 40 |                                            |                                                                                            |
| 41 | Idade membru uma-kain 4                    | (If unsure, please estimate age (to the nearest 10 years))                                 |
| 42 |                                            |                                                                                            |
| 43 |                                            |                                                                                            |
| 44 | Adult or child?                            | <input type="radio"/> Adult                                                                |
| 45 |                                            | <input type="radio"/> Child                                                                |
| 46 |                                            | (Only fill this out if age cannot be estimated)                                            |
| 47 |                                            |                                                                                            |
| 48 | Study ID number of household member 4      |                                                                                            |
| 49 |                                            |                                                                                            |
| 50 | Númeru ID estudu nian ba membru uma-kain 4 | (Only fill if he/she chooses to participate / Preenxe deit kuandu nia hili atu partisipa)  |
| 51 |                                            |                                                                                            |
| 52 |                                            |                                                                                            |
| 53 |                                            |                                                                                            |
| 54 | Gender of household member 5               | <input type="radio"/> Male / Mane                                                          |
| 55 |                                            | <input type="radio"/> Female / Feto                                                        |
| 56 | Jeneru membru uma-kain 5                   |                                                                                            |
| 57 |                                            |                                                                                            |
| 58 | Age of household member 5                  |                                                                                            |
| 59 |                                            |                                                                                            |
| 60 | Idade membru uma-kain 5                    | (If unsure, please estimate age (to the nearest 10 years))                                 |

|    |                                            |                                                    |
|----|--------------------------------------------|----------------------------------------------------|
| 1  | Adult or child?                            | <input type="radio"/> Adult                        |
| 2  |                                            | <input type="radio"/> Child                        |
| 3  |                                            | (Only fill this out if age cannot be estimated)    |
| 4  |                                            |                                                    |
| 5  | Study ID number of household member 5      |                                                    |
| 6  |                                            |                                                    |
| 7  | Númeru ID estudu nian ba membru uma-kain 5 | (Only fill if he/she chooses to participate /      |
| 8  |                                            | Preenxe deit kuandu nia hili atu partisipa)        |
| 9  |                                            |                                                    |
| 10 |                                            |                                                    |
| 11 | Gender of household member 6               | <input type="radio"/> Male / Mane                  |
| 12 |                                            | <input type="radio"/> Female / Feto                |
| 13 | Jeneru membru uma-kain 6                   |                                                    |
| 14 |                                            |                                                    |
| 15 | Age of household member 6                  |                                                    |
| 16 |                                            |                                                    |
| 17 | Idade membru uma-kain 6                    | (If unsure, please estimate age (to the nearest 10 |
| 18 |                                            | years))                                            |
| 19 |                                            |                                                    |
| 20 | Adult or child?                            | <input type="radio"/> Adult                        |
| 21 |                                            | <input type="radio"/> Child                        |
| 22 |                                            | (Only fill this out if age cannot be estimated)    |
| 23 |                                            |                                                    |
| 24 | Study ID number of household member 6      |                                                    |
| 25 |                                            |                                                    |
| 26 | Númeru ID estudu nian ba membru uma-kain 6 | (Only fill if he/she chooses to participate /      |
| 27 |                                            | Preenxe deit kuandu nia hili atu partisipa)        |
| 28 |                                            |                                                    |
| 29 |                                            |                                                    |
| 30 | Gender of household member 7               | <input type="radio"/> Male / Mane                  |
| 31 |                                            | <input type="radio"/> Female / Feto                |
| 32 | Jeneru membru uma-kain 7                   |                                                    |
| 33 |                                            |                                                    |
| 34 | Age of household member 7                  |                                                    |
| 35 |                                            |                                                    |
| 36 | Idade membru uma-kain 7                    | (If unsure, please estimate age (to the nearest 10 |
| 37 |                                            | years))                                            |
| 38 |                                            |                                                    |
| 39 | Adult or child?                            | <input type="radio"/> Adult                        |
| 40 |                                            | <input type="radio"/> Child                        |
| 41 |                                            | (Only fill this out if age cannot be estimated)    |
| 42 |                                            |                                                    |
| 43 | Study ID number of household member 7      |                                                    |
| 44 |                                            |                                                    |
| 45 | Númeru ID estudu nian ba membru uma-kain 7 | (Only fill if he/she chooses to participate /      |
| 46 |                                            | Preenxe deit kuandu nia hili atu partisipa)        |
| 47 |                                            |                                                    |
| 48 |                                            |                                                    |
| 49 | Gender of household member 8               | <input type="radio"/> Male / Mane                  |
| 50 |                                            | <input type="radio"/> Female / Feto                |
| 51 | Jeneru membru uma-kain 8                   |                                                    |
| 52 |                                            |                                                    |
| 53 | Age of household member 8                  |                                                    |
| 54 |                                            |                                                    |
| 55 | Idade membru uma-kain 8                    | (If unsure, please estimate age (to the nearest 10 |
| 56 |                                            | years))                                            |
| 57 |                                            |                                                    |
| 58 | Adult or child?                            | <input type="radio"/> Adult                        |
| 59 |                                            | <input type="radio"/> Child                        |
| 60 |                                            | (Only fill this out if age cannot be estimated)    |

|    |                                             |                                                    |
|----|---------------------------------------------|----------------------------------------------------|
| 1  | Study ID number of household member 8       |                                                    |
| 2  |                                             |                                                    |
| 3  | Númeru ID estudu nian ba membru uma-kain 8  | (Only fill if he/she chooses to participate /      |
| 4  |                                             | Preenxe deit kuandu nia hili atu partisipa)        |
| 5  |                                             |                                                    |
| 6  | Gender of household member 9                | <input type="radio"/> Male / Mane                  |
| 7  |                                             | <input type="radio"/> Female / Feto                |
| 8  | Jeneru membru uma-kain 9                    |                                                    |
| 9  |                                             |                                                    |
| 10 |                                             |                                                    |
| 11 | Age of household member 9                   |                                                    |
| 12 |                                             |                                                    |
| 13 | Idade membru uma-kain 9                     | (If unsure, please estimate age (to the nearest 10 |
| 14 |                                             | years))                                            |
| 15 |                                             |                                                    |
| 16 | Adult or child?                             | <input type="radio"/> Adult                        |
| 17 |                                             | <input type="radio"/> Child                        |
| 18 |                                             | (Only fill this out if age cannot be estimated)    |
| 19 |                                             |                                                    |
| 20 | Study ID number of household member 9       |                                                    |
| 21 |                                             |                                                    |
| 22 | Númeru ID estudu nian ba membru uma-kain 9  | (Only fill if he/she chooses to participate /      |
| 23 |                                             | Preenxe deit kuandu nia hili atu partisipa)        |
| 24 |                                             |                                                    |
| 25 |                                             |                                                    |
| 26 | Gender of household member 10               | <input type="radio"/> Male / Mane                  |
| 27 |                                             | <input type="radio"/> Female / Feto                |
| 28 | Jeneru membru uma-kain 10                   |                                                    |
| 29 |                                             |                                                    |
| 30 |                                             |                                                    |
| 31 | Age of household member 10                  |                                                    |
| 32 |                                             |                                                    |
| 33 | Idade membru uma-kain 10                    | (If unsure, please estimate age (to the nearest 10 |
| 34 |                                             | years))                                            |
| 35 |                                             |                                                    |
| 36 | Adult or child?                             | <input type="radio"/> Adult                        |
| 37 |                                             | <input type="radio"/> Child                        |
| 38 |                                             | (Only fill this out if age cannot be estimated)    |
| 39 |                                             |                                                    |
| 40 | Study ID number of household member 10      |                                                    |
| 41 |                                             |                                                    |
| 42 | Númeru ID estudu nian ba membru uma-kain 10 | (Only fill if he/she chooses to participate /      |
| 43 |                                             | Preenxe deit kuandu nia hili atu partisipa)        |
| 44 |                                             |                                                    |
| 45 |                                             |                                                    |
| 46 | Gender of household member 11               | <input type="radio"/> Male / Mane                  |
| 47 |                                             | <input type="radio"/> Female / Feto                |
| 48 | Jeneru membru uma-kain 11                   |                                                    |
| 49 |                                             |                                                    |
| 50 |                                             |                                                    |
| 51 | Age of household member 11                  |                                                    |
| 52 |                                             |                                                    |
| 53 | Idade membru uma-kain 11                    | (If unsure, please estimate age (to the nearest 10 |
| 54 |                                             | years))                                            |
| 55 |                                             |                                                    |
| 56 | Adult or child?                             | <input type="radio"/> Adult                        |
| 57 |                                             | <input type="radio"/> Child                        |
| 58 |                                             | (Only fill this out if age cannot be estimated)    |
| 59 |                                             |                                                    |
| 60 | Study ID number of household member 11      |                                                    |
| 61 |                                             |                                                    |
| 62 | Númeru ID estudu nian ba membru uma-kain 11 | (Only fill if he/she chooses to participate /      |
| 63 |                                             | Preenxe deit kuandu nia hili atu partisipa)        |

|    |                                             |                                                                                           |
|----|---------------------------------------------|-------------------------------------------------------------------------------------------|
| 1  | Gender of household member 12               | <input type="radio"/> Male / Mane                                                         |
| 2  |                                             | <input type="radio"/> Female / Feto                                                       |
| 3  | Jeneru membru uma-kain 12                   |                                                                                           |
| 4  |                                             |                                                                                           |
| 5  | Age of household member 12                  |                                                                                           |
| 6  |                                             |                                                                                           |
| 7  | Idade membru uma-kain 12                    | (If unsure, please estimate age (to the nearest 10 years))                                |
| 8  |                                             |                                                                                           |
| 9  |                                             |                                                                                           |
| 10 | Adult or child?                             | <input type="radio"/> Adult                                                               |
| 11 |                                             | <input type="radio"/> Child                                                               |
| 12 |                                             | (Only fill this out if age cannot be estimated)                                           |
| 13 |                                             |                                                                                           |
| 14 |                                             |                                                                                           |
| 15 | Study ID number of household member 12      |                                                                                           |
| 16 |                                             |                                                                                           |
| 17 | Númeru ID estudu nian ba membru uma-kain 12 | (Only fill if he/she chooses to participate / Preenxe deit kuandu nia hili atu partisipa) |
| 18 |                                             |                                                                                           |
| 19 |                                             |                                                                                           |
| 20 | Gender of household member 13               | <input type="radio"/> Male / Mane                                                         |
| 21 |                                             | <input type="radio"/> Female / Feto                                                       |
| 22 | Jeneru membru uma-kain 13                   |                                                                                           |
| 23 |                                             |                                                                                           |
| 24 | Age of household member 13                  |                                                                                           |
| 25 |                                             |                                                                                           |
| 26 | Idade membru uma-kain 13                    | (If unsure, please estimate age (to the nearest 10 years))                                |
| 27 |                                             |                                                                                           |
| 28 |                                             |                                                                                           |
| 29 | Adult or child?                             | <input type="radio"/> Adult                                                               |
| 30 |                                             | <input type="radio"/> Child                                                               |
| 31 |                                             | (Only fill this out if age cannot be estimated)                                           |
| 32 |                                             |                                                                                           |
| 33 |                                             |                                                                                           |
| 34 | Study ID number of household member 13      |                                                                                           |
| 35 |                                             |                                                                                           |
| 36 | Númeru ID estudu nian ba membru uma-kain 13 | (Only fill if he/she chooses to participate / Preenxe deit kuandu nia hili atu partisipa) |
| 37 |                                             |                                                                                           |
| 38 |                                             |                                                                                           |
| 39 | Gender of household member 14               | <input type="radio"/> Male / Mane                                                         |
| 40 |                                             | <input type="radio"/> Female / Feto                                                       |
| 41 | Jeneru membru uma-kain 14                   |                                                                                           |
| 42 |                                             |                                                                                           |
| 43 | Age of household member 14                  |                                                                                           |
| 44 |                                             |                                                                                           |
| 45 | Idade membru uma-kain 14                    | (If unsure, please estimate age (to the nearest 10 years))                                |
| 46 |                                             |                                                                                           |
| 47 |                                             |                                                                                           |
| 48 | Adult or child?                             | <input type="radio"/> Adult                                                               |
| 49 |                                             | <input type="radio"/> Child                                                               |
| 50 |                                             | (Only fill this out if age cannot be estimated)                                           |
| 51 |                                             |                                                                                           |
| 52 |                                             |                                                                                           |
| 53 | Study ID number of household member 14      |                                                                                           |
| 54 |                                             |                                                                                           |
| 55 | Númeru ID estudu nian ba membru uma-kain 14 | (Only fill if he/she chooses to participate / Preenxe deit kuandu nia hili atu partisipa) |
| 56 |                                             |                                                                                           |
| 57 |                                             |                                                                                           |
| 58 | Gender of household member 15               | <input type="radio"/> Male / Mane                                                         |
| 59 |                                             | <input type="radio"/> Female / Feto                                                       |
| 60 | Jeneru membru uma-kain 15                   |                                                                                           |



|    |                                             |                                                                                           |
|----|---------------------------------------------|-------------------------------------------------------------------------------------------|
| 1  | Age of household member 15                  |                                                                                           |
| 2  |                                             |                                                                                           |
| 3  | Idade membru uma-kain 15                    | (If unsure, please estimate age (to the nearest 10 years))                                |
| 4  |                                             |                                                                                           |
| 5  |                                             |                                                                                           |
| 6  | Adult or child?                             | <input type="radio"/> Adult                                                               |
| 7  |                                             | <input type="radio"/> Child                                                               |
| 8  |                                             | (Only fill this out if age cannot be estimated)                                           |
| 9  |                                             |                                                                                           |
| 10 |                                             |                                                                                           |
| 11 | Study ID number of household member 15      |                                                                                           |
| 12 |                                             |                                                                                           |
| 13 | Númeru ID estudu nian ba membru uma-kain 15 | (Only fill if he/she chooses to participate / Preenxe deit kuandu nia hili atu partisipa) |
| 14 |                                             |                                                                                           |
| 15 |                                             |                                                                                           |
| 16 | Gender of household member 16               | <input type="radio"/> Male / Mane                                                         |
| 17 |                                             | <input type="radio"/> Female / Feto                                                       |
| 18 | Jeneru membru uma-kain 16                   |                                                                                           |
| 19 |                                             |                                                                                           |
| 20 | Age of household member 16                  |                                                                                           |
| 21 |                                             |                                                                                           |
| 22 | Idade membru uma-kain 16                    | (If unsure, please estimate age (to the nearest 10 years))                                |
| 23 |                                             |                                                                                           |
| 24 |                                             |                                                                                           |
| 25 | Adult or child?                             | <input type="radio"/> Adult                                                               |
| 26 |                                             | <input type="radio"/> Child                                                               |
| 27 |                                             | (Only fill this out if age cannot be estimated)                                           |
| 28 |                                             |                                                                                           |
| 29 |                                             |                                                                                           |
| 30 | Study ID number of household member 16      |                                                                                           |
| 31 |                                             |                                                                                           |
| 32 | Númeru ID estudu nian ba membru uma-kain 16 | (Only fill if he/she chooses to participate / Preenxe deit kuandu nia hili atu partisipa) |
| 33 |                                             |                                                                                           |
| 34 |                                             |                                                                                           |
| 35 | Gender of household member 17               | <input type="radio"/> Male / Mane                                                         |
| 36 |                                             | <input type="radio"/> Female / Feto                                                       |
| 37 | Jeneru membru uma-kain 17                   |                                                                                           |
| 38 |                                             |                                                                                           |
| 39 | Age of household member 17                  |                                                                                           |
| 40 |                                             |                                                                                           |
| 41 | Idade membru uma-kain 17                    | (If unsure, please estimate age (to the nearest 10 years))                                |
| 42 |                                             |                                                                                           |
| 43 |                                             |                                                                                           |
| 44 | Adult or child?                             | <input type="radio"/> Adult                                                               |
| 45 |                                             | <input type="radio"/> Child                                                               |
| 46 |                                             | (Only fill this out if age cannot be estimated)                                           |
| 47 |                                             |                                                                                           |
| 48 |                                             |                                                                                           |
| 49 | Study ID number of household member 17      |                                                                                           |
| 50 |                                             |                                                                                           |
| 51 | Númeru ID estudu nian ba membru uma-kain 17 | (Only fill if he/she chooses to participate / Preenxe deit kuandu nia hili atu partisipa) |
| 52 |                                             |                                                                                           |
| 53 |                                             |                                                                                           |
| 54 | Gender of household member 18               | <input type="radio"/> Male / Mane                                                         |
| 55 |                                             | <input type="radio"/> Female / Feto                                                       |
| 56 | Jeneru membru uma-kain 18                   |                                                                                           |
| 57 |                                             |                                                                                           |
| 58 | Age of household member 18                  |                                                                                           |
| 59 |                                             |                                                                                           |
| 60 | Idade membru uma-kain 18                    | (If unsure, please estimate age (to the nearest 10 years))                                |

|    |                                                                                                             |                                                              |
|----|-------------------------------------------------------------------------------------------------------------|--------------------------------------------------------------|
| 1  | Adult or child?                                                                                             | <input type="radio"/> Adult                                  |
| 2  |                                                                                                             | <input type="radio"/> Child                                  |
| 3  |                                                                                                             | (Only fill this out if age cannot be estimated)              |
| 4  |                                                                                                             |                                                              |
| 5  | Study ID number of household member 18                                                                      |                                                              |
| 6  |                                                                                                             |                                                              |
| 7  | Númeru ID estudu nian ba membru uma-kain 18                                                                 | (Only fill if he/she chooses to participate /                |
| 8  |                                                                                                             | Preenxe deit kuandu nia hili atu partisipa)                  |
| 9  |                                                                                                             |                                                              |
| 10 | Gender of household member 19                                                                               | <input type="radio"/> Male / Mane                            |
| 11 |                                                                                                             | <input type="radio"/> Female / Feto                          |
| 12 | Jeneru membru uma-kain 19                                                                                   |                                                              |
| 13 |                                                                                                             |                                                              |
| 14 |                                                                                                             |                                                              |
| 15 | Age of household member 19                                                                                  |                                                              |
| 16 |                                                                                                             |                                                              |
| 17 | Idade membru uma-kain 19                                                                                    | (If unsure, please estimate age (to the nearest 10           |
| 18 |                                                                                                             | years))                                                      |
| 19 |                                                                                                             |                                                              |
| 20 | Adult or child?                                                                                             | <input type="radio"/> Adult                                  |
| 21 |                                                                                                             | <input type="radio"/> Child                                  |
| 22 |                                                                                                             | (Only fill this out if age cannot be estimated)              |
| 23 |                                                                                                             |                                                              |
| 24 | Study ID number of household member 19                                                                      |                                                              |
| 25 |                                                                                                             |                                                              |
| 26 | Númeru ID estudu nian ba membru uma-kain 19                                                                 | (Only fill if he/she chooses to participate /                |
| 27 |                                                                                                             | Preenxe deit kuandu nia hili atu partisipa)                  |
| 28 |                                                                                                             |                                                              |
| 29 |                                                                                                             |                                                              |
| 30 | Gender of household member 20                                                                               | <input type="radio"/> Male / Mane                            |
| 31 |                                                                                                             | <input type="radio"/> Female / Feto                          |
| 32 | Jeneru membru uma-kain 20                                                                                   |                                                              |
| 33 |                                                                                                             |                                                              |
| 34 | Age of household member 20                                                                                  |                                                              |
| 35 |                                                                                                             |                                                              |
| 36 | Idade membru uma-kain 20                                                                                    | (If unsure, please estimate age (to the nearest 10           |
| 37 |                                                                                                             | years))                                                      |
| 38 |                                                                                                             |                                                              |
| 39 | Adult or child?                                                                                             | <input type="radio"/> Adult                                  |
| 40 |                                                                                                             | <input type="radio"/> Child                                  |
| 41 |                                                                                                             | (Only fill this out if age cannot be estimated)              |
| 42 |                                                                                                             |                                                              |
| 43 | Study ID number of household member 20                                                                      |                                                              |
| 44 |                                                                                                             |                                                              |
| 45 | Númeru ID estudu nian ba membru uma-kain 20                                                                 | (Only fill if he/she chooses to participate /                |
| 46 |                                                                                                             | Preenxe deit kuandu nia hili atu partisipa)                  |
| 47 |                                                                                                             |                                                              |
| 48 |                                                                                                             |                                                              |
| 49 | At any time in the past 12 months, has anyone sprayed the interior walls of your house?                     | <input type="checkbox"/> Yes / Sim                           |
| 50 |                                                                                                             | <input type="checkbox"/> No / Lae                            |
| 51 |                                                                                                             | <input type="checkbox"/> Don't know / hatene                 |
| 52 | Durante fulan 12 liu-bá, iha ema ruma mai rega ita boot nia moru/uma nia didin lolon (parte laran), ka lae? |                                                              |
| 53 |                                                                                                             |                                                              |
| 54 |                                                                                                             |                                                              |
| 55 |                                                                                                             |                                                              |
| 56 | What do you use to stop being bitten by mosquitoes at night time?                                           | <input type="checkbox"/> Sprays / Rega ho aimoruk susuk nian |
| 57 |                                                                                                             | <input type="checkbox"/> Coils / Ai-moruk susuk nian (sunu)  |
| 58 |                                                                                                             | <input type="checkbox"/> Bednets / Moskiteiru                |
| 59 | Saida mak ita bo'ot uza hodi prevene susuk labele tata iha tempu kalan?                                     | <input type="checkbox"/> Other / Seluk                       |
| 60 |                                                                                                             | <input type="checkbox"/> None / La iha                       |

1 Please specify

2  
3 Favor espesifika

4  
5  
6  
7  
8  
9  
10  
11  
12  
13  
14  
15  
16  
17  
18  
19  
20  
21  
22  
23  
24  
25  
26  
27  
28  
29  
30  
31  
32  
33  
34  
35  
36  
37  
38  
39  
40  
41  
42  
43  
44  
45  
46  
47  
48  
49  
50  
51  
52  
53  
54  
55  
56  
57  
58  
59  
60

For peer review only

# Individual Participant Questionnaire

Record ID

## Demographic information

### Informasaun Demográfiku

Household number

Númeru Uma-kain

Study ID number

Númeru ID estudu

(Use number on sample sticker / Uza númeru iha amostra nia sticker)

Name of interviewer

Naran entrevistador

Date of interview

Data halao entrevista

First name

Naran prinsipal

Family name

Naran Familia

Gender

- Female / Feto  
 Male / Mane  
 Other/Unknown / Seluk/La hatene

Jeneru

Date of birth

Data moris

Age

Idade

(Only need to fill if date-of-birth is not known / Presiza atu preenxe deit karik la hatene data moris)

Phone number(s)

Numeru Telemovel

Email address

|    |                                                                 |                                              |
|----|-----------------------------------------------------------------|----------------------------------------------|
| 1  | Nationality                                                     | <input type="radio"/> Timorese / Timor oan   |
| 2  |                                                                 | <input type="radio"/> Other / seluk          |
| 3  | Nasionalidade                                                   |                                              |
| 4  |                                                                 |                                              |
| 5  | Specify                                                         |                                              |
| 6  |                                                                 |                                              |
| 7  | Espesifika                                                      | _____                                        |
| 8  |                                                                 |                                              |
| 9  |                                                                 |                                              |
| 10 | Have you traveled outside Timor-Leste (including West           | <input type="radio"/> Yes / Sim              |
| 11 | Timor, NTT) within the last 6 MONTHS?                           | <input type="radio"/> No / Lae               |
| 12 |                                                                 | <input type="radio"/> Don't know / La hatene |
| 13 | Iha fulan 6 ikus liu, ita bo'ot halao viajen ba                 |                                              |
| 14 | rai-liur ka lae (inklui nasaun viziño Indonesia nia             |                                              |
| 15 | provinsia, NTT)?                                                |                                              |
| 16 |                                                                 |                                              |
| 17 | Where did you travel (in the last 6 months)?                    | <input type="radio"/> West Timor (NTT)       |
| 18 |                                                                 | <input type="radio"/> Other / Seluk          |
| 19 | Ita bo'ot ba iha rai ne'ebé? (iha fulan 6 ikus liu)             |                                              |
| 20 |                                                                 |                                              |
| 21 | Please specify the country (or countries) you went to           |                                              |
| 22 | (in the last 6 months)                                          | _____                                        |
| 23 |                                                                 |                                              |
| 24 | Favor espesifika nasaun sira ne'ebé mak ita bo'ot               |                                              |
| 25 | viajem ba ona (iha fulan 6 ikus liu)                            |                                              |
| 26 |                                                                 |                                              |
| 27 | Have you ever traveled outside Timor-Leste in your              | <input type="radio"/> Yes / Sim              |
| 28 | lifetime (but MORE THAN 6 MONTHS AGO)? This includes            | <input type="radio"/> No / Lae               |
| 29 | travel to West Timor (NTT).                                     | <input type="radio"/> Don't know / La hatene |
| 30 |                                                                 |                                              |
| 31 | Ita bo'ot halao ona viajem fora husi Timor-Leste,               |                                              |
| 32 | durante vida moris? (maibe husi fulan 6 liu-bá                  |                                              |
| 33 | kotuk)? Ida ne'e inklui viajem provinsia NTT                    |                                              |
| 34 |                                                                 |                                              |
| 35 | Where did you travel (MORE THAN 6 MONTHS AGO)?                  | <input type="radio"/> West Timor (NTT)       |
| 36 |                                                                 | <input type="radio"/> Other / Seluk          |
| 37 | Ita bo'ot viajen ba iha rai ne'ebé (FULAN 6 IKUS LIU            |                                              |
| 38 | BA KOTUK)?                                                      |                                              |
| 39 |                                                                 |                                              |
| 40 | Please specify the country (or countries) you went to           |                                              |
| 41 | MORE THAN 6 MONTHS AGO                                          | _____                                        |
| 42 |                                                                 |                                              |
| 43 | Favor espesifika nasaun sira ne'ebé mak ita bo'ot ba            |                                              |
| 44 | ona IHA FULAN 6 IKUS LIU BA KOTUK                               |                                              |
| 45 |                                                                 |                                              |
| 46 |                                                                 |                                              |
| 47 | <b>Questions about febrile illness within the last 6 months</b> |                                              |
| 48 |                                                                 |                                              |
| 49 |                                                                 |                                              |
| 50 | <b>Pergunta konaba moras isin manas iha fulan 6 ikus liu</b>    |                                              |
| 51 |                                                                 |                                              |
| 52 | Have you been unwell with a FEVER within the last 6             | <input type="radio"/> Yes / Sim              |
| 53 | months?                                                         | <input type="radio"/> No / Lae               |
| 54 |                                                                 | <input type="radio"/> Don't know / La hatene |
| 55 | Ita bo'ot sente moras ho ISIN MANAS iha fulan 6 ikus            |                                              |
| 56 | liu nia laran ka lae?                                           |                                              |
| 57 |                                                                 |                                              |
| 58 |                                                                 |                                              |
| 59 |                                                                 |                                              |
| 60 |                                                                 |                                              |

|                                                                |                                                                                                                                                                                                                                                                                                                                                    |                                                                                                                                                                                                                                                                                                                                                                                                                              |
|----------------------------------------------------------------|----------------------------------------------------------------------------------------------------------------------------------------------------------------------------------------------------------------------------------------------------------------------------------------------------------------------------------------------------|------------------------------------------------------------------------------------------------------------------------------------------------------------------------------------------------------------------------------------------------------------------------------------------------------------------------------------------------------------------------------------------------------------------------------|
| 1<br>2<br>3<br>4<br>5<br>6<br>7                                | When you had this illness, did you seek any medical care?<br><br>Iha momentu ita bo'ot hetan moras ida-ne'e, ita bo'ot ba konsulta iha fasilidade saúde ka lae?                                                                                                                                                                                    | <input type="radio"/> Yes / Sim<br><input type="radio"/> No / Lae<br><input type="radio"/> Don't know / La hatene<br>(Includes medical clinic, pharmacy, hospital etc. / Inklui klinika mediku, farmasia, hospital, etc.)                                                                                                                                                                                                    |
| 8<br>9<br>10<br>11<br>12<br>13<br>14<br>15<br>16               | When you sought medical care with fever in the last 6 months, did you get diagnosed by a healthcare professional with any of the following infections?<br><br>Wainhira ita bo'ot buka tratamentu husi mediku sira ho isin manas iha fulan 6 ikus liu, ita bo'ot hetan diagnostiku husi professional saúde ho infeksaun hirak tuir mai ne'e ka lae? | <input type="checkbox"/> COVID-19<br><input type="checkbox"/> Dengue / Denge<br><input type="checkbox"/> Malaria<br><input type="checkbox"/> Other / Seluk<br><input type="checkbox"/> No specific diagnosis was made / La halo diagnostiku espesifiku                                                                                                                                                                       |
| 17<br>18<br>19<br>20<br>21<br>22<br>23<br>24<br>25<br>26       | When you were diagnosed with COVID-19, how was this diagnosis made?<br><br>Wainhira ita bo'ot diagnoza ho COVID-19, oinsa mak hetan diagnoza ida ne'e?                                                                                                                                                                                             | <input type="radio"/> I was tested for COVID-19 and the test was POSITIVE / Hau halo teste ba COVID-19 no teste nia rezultadu POZITIVU<br><input type="radio"/> I did NOT receive a positive test, but I was diagnosed with COVID-19 anyway / Hau la hetan teste pozitivu, maibe nafatin diagnoza hau ho COVID-19<br><input type="radio"/> I don't know if I was tested or not / Hau la hatene karik hau teste ona ou seidak |
| 27<br>28<br>29<br>30<br>31<br>32<br>33<br>34<br>35             | When you were diagnosed with DENGUE, how was this diagnosis made?<br><br>Wainhira ita bo'ot diagnoza ho DENGUE, oinsa mak hetan diagnoza ida ne'e?                                                                                                                                                                                                 | <input type="radio"/> I was tested for DENGUE and the test was POSITIVE / Hau halo teste ba DENGUE no teste nia rezultadu POZITIVU<br><input type="radio"/> I did NOT receive a positive test, but I was diagnosed with DENGUE anyway / Hau la hetan teste pozitivu, maibe nafatin diagnoza hau ho DENGUE<br><input type="radio"/> I don't know if I was tested or not / Hau la hatene karik hau teste ona ou seidak         |
| 36<br>37<br>38<br>39<br>40<br>41<br>42<br>43<br>44<br>45<br>46 | When you were diagnosed with MALARIA, how was this diagnosis made?<br><br>Wainhira ita bo'ot diagnoza ho MALARIA, oinsa mak hetan diagnoza ida ne'e?                                                                                                                                                                                               | <input type="radio"/> I was tested for MALARIA and the test was POSITIVE / Hau halo teste ba MALARIA no teste nia rezultadu POZITIVU<br><input type="radio"/> I did NOT receive a positive test, but I was diagnosed with MALARIA anyway / Hau la hetan teste pozitivu, maibe nafatin diagnoza hau ho MALARIA<br><input type="radio"/> I don't know if I was tested or not / Hau la hatene karik hau teste ona ou seidak     |
| 47                                                             | <b>Questions about PREVIOUS illness and vaccination</b>                                                                                                                                                                                                                                                                                            |                                                                                                                                                                                                                                                                                                                                                                                                                              |
| 48<br>49<br>50<br>51<br>52<br>53<br>54<br>55                   | Have you ever been diagnosed with COVID-19 by a healthcare worker in your life (even MORE THAN 6 MONTHS AGO)?<br><br>Antes ne'e doutor sira diagnoza ona ita bo'ot ho COVID-19 ka lae, iha ita bo'ot nia moris (BELE LIU HUSI FULAN 6 BA KOTUK)                                                                                                    | <input type="radio"/> Yes / Sim<br><input type="radio"/> No / Lae<br><input type="radio"/> Don't know / La hatene<br>(Answer 'yes', even if a COVID diagnosis within 6 months was reported in previous answers / Hatán 'Sim', maske diagnoza ho COVID-19 iha fulan 6 nia laran ne'e relata ona iha resposta anterior)                                                                                                        |
| 56<br>57<br>58<br>59<br>60                                     | When did you get diagnosed with COVID-19?<br><br>Ita bo'ot hetan diagnostiku ho COVID-19 ne'e iha loraon saida?                                                                                                                                                                                                                                    | (Enter approximate date if unsure, leave blank if unknown / Hatama data tuir hanoin karik la serteza, husik mamuk deit karik la hatene)                                                                                                                                                                                                                                                                                      |

|                                                    |                                                                                                                                                                                                                                            |                                                                                                                                                                                                                                                                                                                               |
|----------------------------------------------------|--------------------------------------------------------------------------------------------------------------------------------------------------------------------------------------------------------------------------------------------|-------------------------------------------------------------------------------------------------------------------------------------------------------------------------------------------------------------------------------------------------------------------------------------------------------------------------------|
| 1<br>2<br>3<br>4<br>5<br>6<br>7<br>8               | Have you ever been diagnosed by a healthcare worker with DENGUE in your life (even MORE THAN 6 MONTHS AGO)?<br>Antes ne'e doutor sira diagnoza ona ita bo'ot ho DENGUE ka lae, iha ita bo'ot nia moris (BELE LIU HUSI FULAN 6 BA KOTUK)?   | <input type="radio"/> Yes / Sim<br><input type="radio"/> No / Lae<br><input type="radio"/> Don't know / La hatene<br>(Answer 'yes', even if a DENGUE diagnosis within 6 months was reported in previous answers / Hatán 'Sim', maske diagnoza ho DENGUE iha fulan 6 nia laran ne'e relata ona iha resposta anterior)          |
| 9<br>10<br>11<br>12<br>13<br>14<br>15<br>16<br>17  | Have you ever been diagnosed by a healthcare worker with MALARIA in your life (even MORE THAN 6 MONTHS AGO)?<br>Antes ne'e doutor sira diagnoza ona ita bo'ot ho MALARIA ka lae, iha ita bo'ot nia moris (BELE LIU HUSI FULAN 6 BA KOTUK)? | <input type="radio"/> Yes / Sim<br><input type="radio"/> No / Lae<br><input type="radio"/> Don't know / La hatene<br>(Answer 'yes', even if a MALARIA diagnosis within 6 months was reported in previous answers / Hatán 'Sim', maske kuandu diagnoza ho MALARIA iha fulan 6 nia laran ne'e relata ona iha resposta anterior) |
| 18<br>19<br>20<br>21                               | Have you received vaccination for COVID-19?<br>Ita bo'ot simu ona vasinasaun ba COVID-19?                                                                                                                                                  | <input type="radio"/> Yes / Sim<br><input type="radio"/> No / Lae                                                                                                                                                                                                                                                             |
| 22<br>23<br>24<br>25<br>26<br>27                   | Number of doses<br>Numeru dose                                                                                                                                                                                                             | <input type="radio"/> 1<br><input type="radio"/> 2<br><input type="radio"/> 3<br><input type="radio"/> More than 3 / Liu husi 3                                                                                                                                                                                               |
| 28<br>29<br>30<br>31<br>32<br>33                   | When was your FIRST COVID-19 vaccine?<br>Ita bo'ot nia vasina COVID-19 primeiru ne'e simu iha loron saida?                                                                                                                                 | (Enter approximate date if unsure, leave blank if unknown / Hatama data tuir hanoin karik la serteza, husik mamuk deit karik la hatene)                                                                                                                                                                                       |
| 34<br>35<br>36<br>37<br>38<br>39                   | Which type of COVID-19 vaccine was your FIRST dose?<br>Vasina COVID-19 nia tipu ida ne'ebé mak ita bo'ot simu ba dose primeiru?                                                                                                            | <input type="checkbox"/> AstraZenica<br><input type="checkbox"/> Sinovac<br><input type="checkbox"/> Pfizer<br><input type="checkbox"/> Other / Seluk<br><input type="checkbox"/> Don't know / La hatene                                                                                                                      |
| 40<br>41<br>42<br>43<br>44<br>45                   | When was your SECOND COVID-19 vaccine?<br>Ita bo'ot nia vasina COVID-19 segundu ne'e simu iha loron saida?                                                                                                                                 | (Enter approximate date if unsure, leave blank if unknown / Hatama data tuir hanoin karik la serteza, husik mamuk deit karik la hatene)                                                                                                                                                                                       |
| 46<br>47<br>48<br>49<br>50<br>51                   | Which type of COVID-19 vaccine was your SECOND dose?<br>Vasina COVID-19 nia tipu ida ne'ebé mak ita bo'ot simu ba dose segundu?                                                                                                            | <input type="checkbox"/> AstraZenica<br><input type="checkbox"/> Sinovac<br><input type="checkbox"/> Pfizer<br><input type="checkbox"/> Other / Seluk<br><input type="checkbox"/> Don't know / La hatene                                                                                                                      |
| 52<br>53<br>54<br>55<br>56<br>57<br>58<br>59<br>60 | When was your THIRD COVID-19 vaccine?<br>Ita bo'ot nia vasina COVID-19 terseiru ne'e simu iha loron saida?                                                                                                                                 | (Enter approximate date if unsure, leave blank if unknown / Hatama data tuir hanoin karik la serteza, husik mamuk deit karik la hatene)                                                                                                                                                                                       |

1 Which type of COVID-19 vaccine was your THIRD dose?

- 2  AstraZenica  
 3  Sinovac  
 4  Pfizer  
 5  Other / Seluk  
 6  Don't know / La hatene

7 Vasina COVID-19 nia tipu ida ne'ebé mak ita bo'ot  
 8 simu ba dose terseiru?

9 If you have had more than three COVID-19 vaccines,  
 10 when was your MOST RECENT dose?

(Enter approximate date if unsure, leave blank if  
 11 unknown / Hatama data tuir hanoin karik la  
 12 serteza, husik mamuk deit karik la hatene)

13 Karik ita bo'ot simu vasina COVID-19 barak liu dala  
 14 tolu, entaun ita bo'ot nia dose ikus liu ne'e simu iha  
 15 loron saida?

16 If you have had more than three doses of COVID  
 17 vaccines, which type have you received for your MOST  
 18 RECENT DOSE?

- 19  AstraZenica  
 20  Sinovac  
 21  Pfizer  
 22  Other / Seluk  
 23  Don't know / La hatene

24 Karik ita bo'ot simu vasina COVID-19 ne'e barak liu  
 25 dala tolu, tipu vasina ida ne'ebé mak ita bo'ot simu  
 26 ikus liu?

27 Do you wish to be vaccinated for COVID-19?

- 28  Yes / Sim  
 29  No / Lae  
 30  Don't know / La hatene  
 31  Not applicable - too young to answer this question  
 32 / La aplikavel - sei kiik seidauk bele hatán  
 33 ba pergunta ida ne'e  
 34 (Only for participants who have not received any  
 35 doses of COVID-19 vaccines / pergunta ida ne'e  
 36 husu deit ba partisipante sira ne'ebé mak seidauk  
 37 simu vasina COVID-19 nia dose ruma)

38 Ita bo'ot hakarak atu simu vasina ba COVID-19?

39 Why have you not received a SECOND dose of COVID-19  
 40 vaccine?

41 Tamba saida mak ita bo'ot seidauk simu vasina COVID-19  
 42 nia dose segundu?

- 43  It is less than 3 months since my first dose,  
 44 therefore my second dose is not due yet /  
 45 Seidauk to'o fulan 3, desde hau nia vasina dose  
 46 primeiru, tamba ne'e hau nia dose segundu nia  
 47 tempu seidauk to'o  
 48  It is more than 3 months since my first dose, but  
 49 I have not been offered a second dose yet /  
 50 Tempu liu tiha ona fulan 3 desde hau nia dose  
 51 primeiru, maibe hau seidauk hetan dose segundu  
 52  I got COVID-19 infection after my first dose,  
 53 therefore I don't think I need another dose /  
 54 Hau hetan infeksaun COVID-19 depois de simu dose  
 55 primeiru, tamba ne'e hau hanoin hau la presiza  
 56 dose seluk tan  
 57  I don't want to have another dose / Hau lakoi  
 58 atu simu dose seluk tan  
 59  Other / Seluk  
 60 (Only asked to participants who have received just  
 one dose of COVID-19 vaccine / Husu deit ba  
 partisipante sira ne'ebé mak simu ona vasina  
 COVID-19 nia dose primeiru)

Why don't you want another dose?

Tamba saida mak ita bo'ot lakoi simu dose segundu?

Please specify

Favor espesifika



# Unable to Complete Questionnaire

Record ID \_\_\_\_\_

**Fill this form if Household Questionnaire cannot be filled out (i.e. no data can be collected from the household)**

Household number \_\_\_\_\_

Why could no data be collected?

- Household occupied but head-of-household does not wish to fill out Household Questionnaire
- Household looks occupied but no adult household members were present during all three visits
- Household looks derelict
- Household has been demolished
- Cannot access household

Please state the reason you couldn't find the household \_\_\_\_\_

For peer review only

## VASINA fieldwork SOP – data and sample collection

### For each household, do the following:

1. **Introduce research team to head-of-household and other household member(s)**
  - Explain study, using patient information sheet
  - Wear mask and visor for this
2. **Conduct *Household Questionnaire* on RedCap with head-of-household**
  - Fill this out even if no household members give consent for individual data or samples to be collected (if this is the case, head-of-household should still fill consent form)
  - If head-of-household does not wish to fill *Household Questionnaire* on RedCap, fill *Unable to Complete Questionnaire* on RedCap
3. **Each time you enrol an individual, give them a sticker with their Study ID number on it**
  - Children less than 1 year old should not be enrolled and do not need to be assigned a Study ID number (but their details should still be included on the *Household Questionnaire*)
  - For individuals who are not currently present, assign a study ID number, but keep his/her sticker until the next visit

### For each participant, do the following:

4. **Receive written informed consent (signed form)**
  - For children, receive written informed consent from one of their parents
  - Also receive 'verbal assent' from the child
5. **Conduct *Individual Participant Questionnaire* on RedCap**
6. **Don PPE**
7. **Phlebotomy (maximum x2 attempts)**
  - Adults: use needle and syringe to collect 10ml (x2 tubes)
  - Children: use needle and syringe or butterfly to collect 5ml (x1 tube)
  - Also place x9-12 drops onto filter paper to make three blood spots (*see Dried Blood Spot SOP*).
  - Make sure blood tubes and dried blood spots are clearly labelled with stickers
8. **Finger-prick blood sample (where phlebotomy failed)**
  - Collect 2mls of blood drops into paediatric serum tubes
  - Collect x9-12 drops onto filter paper to make three blood spots.
  - Make sure blood tubes and dried blood spots are clearly labelled with stickers
9. **Store samples**
  - Put labelled blood samples into cool box

1  
2  
3 - Allow blood spot to dry for 4 hours, put into zip-lock bag with desiccant sachet. Put this  
4 into cool box  
5  
6

7 **10. Equipment disposal**

- 8 - Place all sharps into sharps container  
9 - Place all other phlebotomy equipment into clinical waste bags  
10 - Dengue RDT can be disposed of, after good-quality picture and interpretation is done  
11

12  
13 **11. Thank household member(s) and make sure they have a copy of the participant**  
14 **information sheet**

15  
16 **12. Make sure gloves and apron are changed and hands are washed/alcohol gelled before**  
17 **moving onto next participant**  
18  
19  
20  
21  
22  
23  
24  
25  
26  
27  
28  
29  
30  
31  
32  
33  
34  
35  
36  
37  
38  
39  
40  
41  
42  
43  
44  
45  
46  
47  
48  
49  
50  
51  
52  
53  
54  
55  
56  
57  
58  
59  
60

DRAFT

**Appendix 1: Participant information sheet: Participants within Dili**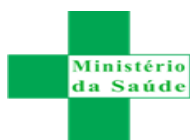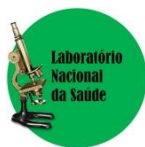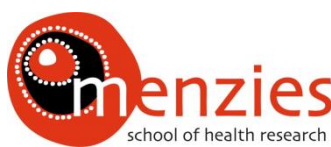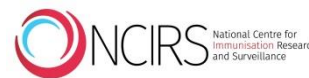

Local Study Coordinator Name, National Health Laboratory, Dili, Phone: TBC; Email: TBC

**SEROLOGICAL STUDY OF VACCINE-PREVENTABLE DISEASES IN TIMOR-LESTE****This is for you to keep / Ida ne'e fó ba ita bo'ot atu rai**

You are being invited to take part in a study about vaccine-preventable diseases, which include COVID-19, Hepatitis B, Measles, Rubella and Dengue.

**Participation:** Taking part in this project is entirely voluntary. You can withdraw from the study at any time. You do not have to explain why you want to withdraw from the study, and there are no negative consequences if you withdraw. If you have any questions, please discuss them with members of our team.

**Partisipasaun:** Partisipa iha projetu ida ne'e completamente voluntariu. Ita bo'ot bele sai husi estudu iha kualker tempu. Ita bo'ot la presiza atu esplika razau tamba saida, no sei la iha konsekuensia negativu karik ita bo'ot sai. Karik ita bo'ot iha kualker pergunta, favor bele hato'o ba membru husi ami nia ekipa.

**What are vaccine preventable diseases?** Vaccine preventable diseases are infectious diseases which can be prevented through vaccination. These include COVID-19, Hepatitis B, Measles, Rubella and Dengue.

**COVID-19** is the disease caused by severe acute respiratory syndrome coronavirus 2 (SARS-CoV-2), which is a type of coronavirus. The virus was first identified in December 2019 and is new for humans. Coronavirus is spread from person to person mostly by droplets and contaminated surfaces. Coronavirus can cause both mild and severe disease, especially in older people and people with medical conditions. Some people with coronavirus may have no symptoms. Common symptoms of coronavirus are fever and cough. Other symptoms include headache, sore throat, tiredness, shortness of breath, sore muscles, loss of taste and smell, chills and vomiting.

COVID-19 started spreading in Timor-Leste in February 2021, and vaccines have been available since April 2021.

**Hepatitis B** is a virus which is spread by contact with blood. This usually occurs from mother to child (during childbirth), but can also occur by contaminated needles or blood transfusions. In some people the virus causes a short infection, the goes away. In other people, the virus causes a long-lasting infection, which can cause damage to the liver over time. Vaccines are given to new-born babies in Timor-Leste, to prevent them from getting Hepatitis B.

**Measles and rubella** are infections which can cause outbreaks in children. They usually cause fever and rash, and can occasionally cause serious illness. Vaccines are given to young children to prevent them from getting measles and rubella.

**Dengue** is a virus spread by mosquitoes which can cause illness in children and adults. Usually it causes fever with headache and rash, sometimes the illness can be serious. Currently vaccines are not used against dengue in Timor-Leste.

## DRAFT

**Who is organising the project?** The study is a collaboration between:

**Se mak organiza projetu ida ne'e?** Estudu ida ne'e kolaborasaun entre:

- Ministry of Health, Timor-Leste / [Ministeriu da Saúde, Timor-Leste](#)
- Menzies School of Health Research, Australia
- National Health Laboratory, Dili / [Laboratóriu Nasional Saúde, Dili](#)
- National Centre for Immunisation Research and Surveillance, Australia / [Sentru Nasional ba Peskiza no Vigilansia Imunizasaun, Australia](#)

**Approval for this project.** This study has been approved by the National Institute of Health, Timor-Leste (Instituto Nacional da Saúde; INS) and the Human Research Ethics Committee of the Northern Territory Department of Health and Menzies School of Health Research in Australia.

**Aprovasaun ba projetu ida ne'e.** Estudu ida ne'e hetan ona aprovasaun husi Institutu Nasional da Saúde (INS), Timor-Leste no Human Research Ethics Committee of the Northern Territory Department of Health no Menzies School of Health Research iha Australia.

**Informed Consent Information / Informasaun Konsentimentu ne'ebé mak Informadu**

**Section 1: Purpose of the study.**

The main purpose of this study is to see how many people in Timor-Leste have antibodies against different vaccine-preventable diseases. If a person has antibodies to a particular infection, it means they have either been exposed in the past, or have been vaccinated. It sometimes means that the person has protection against the infection ('immunity').

We will test the blood for antibodies against COVID-19, hepatitis B, measles, rubella and dengue. These tests will be done in the laboratory in Dili (National Health Laboratory)

Approximately 5600 people in Timor-Leste will be invited to participate in the project.

**Section 2: Procedures.** For each person, we will:

**Seksaun 2: Prosedimentu.** Ba kada partisipante, ami sei:

- Ask some **QUESTIONS** including name, age, gender, contact details, occupation, vaccination details.
- Take a **BLOOD SAMPLE** (5mL). The blood samples will be used to test for previous exposure or vaccination against COVID-19, hepatitis B, measles, rubella and dengue. The blood sample will also be used to test for hepatitis B infection, and to validate check the accuracy of different tests.
- Take a **DRIED BLOOD SPOT** (3 drops of blood). This will be made by applying drops of blood to a small piece of filter paper, then drying.
- The **blood samples may also be used for validating different tests, and for potential future use to answer medical research questions relating to communicable or non-communicable diseases in Timor-Leste.** All results will be de-identified, and only grouped results will be reported. Anonymized blood samples will be stored at the National Health Laboratory for 10 years before being disposed of.

**Section 3: Duration of Procedures.** Collection of the blood sample will take less than 10 minutes. The questionnaire should take about 5 minutes to complete and can be answered in Tetun or English.

**Seksaun 3: Durasan ba Prosedimentu.** Koleksaun ba amostra ran sei uza tempu pelu menus minutu 10. Kuestionariu sei uza tempu durante minutu 5 hodi kompleta, no bele resposta uza lian Tetun ou Ingles.

## DRAFT

**Section 4: Potential benefit to you and others.** / [Seksaun 4: Benefisiu potensial ba ita bo'ot no ema seluk.](#)

The blood tests for COVID-19, measles, rubella and dengue provides evidence of past infection or vaccination, but do not test for current infection. There is no need for any treatment if these tests are positive. The blood test for hepatitis B will check for active infection. If this is positive, you will be offered assessment and management (which may include treatment) at the hepatology clinic at Hospital Nacional Guido Valadares (NHGV).

The results of the study will provide important and useful information for Timor-Leste on the success of managing patients with COVID-19 in health care facilities without the transmission of coronavirus transmission.

**Section 5: Discomforts and Risks.** The potential risks of collecting a venous blood sample include temporary discomfort from the needle, bruising, bleeding, and very rarely, infection. Experienced doctors, nurses, or laboratory technicians will take the blood samples. The risk of problems is very small. In the unlikely event of any significant injury because of the blood collection procedure, the study team and/or the Ministry of Health will arrange necessary medical treatment without financial cost. However, no financial compensation will be given in case of any study-related injury.

[Seksaun 5: Deskonfortus no Risku.](#) Potensia ba risku husi kolekta ran venozu sei inklui mos deskonfortu temporariu husi daun, kulit mean (bubu), ran sai, no infiksaun raramente. Doutor, enfermeiru/a, ou tekniku laboratoriu sira ne'ebé mak iha ona esperiensia mak sei foti amostra ran. Risku ba problema ne'e kiik tebes. Karik mosu kualker prejuizu signifikante relasiona ho prosedimentu ba koleksaun ran nian, ekipa estudu/Ministeriu Saude sei aranja tratamentu medikal ne'ebé mak nesensariu sem kustu finansial. No entantu, sei la iha kompensasaun finansial ba kualker injuria ne'ebé mak mosu relasiona ho prosesu estudu.

If you are found to have active hepatitis B, you will be referred to the hepatology clinic and you will be offered further tests to see if any treatment is required.

**Section 6: Costs for participation.** Taking part in the project will cost nothing apart from your time.

[Seksaun 6: Kustu ba partisipasaun.](#) Partisipasaun iha projetu ida ne'e, sei la kobre kustu ruma exepthu ita bo'ot nia tempu.

**Section 7: Compensation for participation.** You will not receive any payments for being part of this project.

[Seksaun 7: Kompensasaun ba Partisipasaun.](#) Ita bo'ot sei la simu kualker pagamentu ba partisipasaun iha projetu ida ne'e.

**Section 8: Study funding.** This study is funded by the Australian Government Department of Foreign Affairs and Trading (DFAT). The Ministry of Health, Timor-Leste has been closely involved in the planning and development of this study and is involved in undertaking this study. The collaborators do not have any conflict of interests to declare.

[Seksaun 8: Finansiamentu ba estudu.](#) Estudu ida ne'e hetan finansiamentu husi Departamentu Asuntu Estranjeiru no Komersiu, Governo Australia (DFAT). Ministeriu Saude Timor-Leste, proximamente involve ona iha planeamentu no dezvoltamentu ba estudu ida ne'e no envolve ba implementasaun estudu ida ne'e. Kolaboradores sira la iha kualker konfliktu interese atu deklarara.

**Section 9: Voluntary participation.** Taking part in this project is your choice, and you will have the right to stop at any time. If individuals or communities decide not to participate or decide to stop taking part at any time, there will be no penalties.

[Seksaun 9: Partisipasaun Voluntariu.](#) Partisipa iha projetu ida ne'e ita bo'ot mak hili, no ita bo'ot sei

## DRAFT

iha direitu atu hapara/sai iha kualker tempu. Karik individual sira ou comunidade decide atu la partisipa ou decide atu sai husi partisipasaun iha kualker tempu, ida ne'e sei la iha penalidade ruma.

**Section 10: Delivery of results.** If your blood test shows that you have active hepatitis B, you will be contacted and offered assessment and management (which may include treatment) at the hepatology clinic at Hospital Nacional Guido Valadares (NHGV).

You will not be contacted with results of the other blood tests (COVID-19, measles, rubella and dengue antibodies). This is because we are planning on testing 5600 people, the tests may take several months to complete, and it would be very difficult to contact everyone. Additionally, these tests are not for active infections, so there is no need for any treatment if they are positive.

Results for the whole study will be written-up and may be published. It may be used by the Ministry of Health to plan additional vaccines and other disease-control activities in Timor-Leste. During this whole process, individual results will remain strictly confidential.

**Section 11: Privacy and confidentiality.** A unique code will be used to identify and link the questionnaire data and blood sample results. Study records and completed questionnaires will be reviewed, stored, and analyzed on a computer at the Menzies office in Dili and will be kept in secured areas and password protected computers. Blood samples collected for laboratory testing will be labeled with the unique code and securely stored at the National Health Laboratory in Dili, Timor-Leste. The list that matches participants' names with unique codes will be kept in a password protected file on a computer in the Menzies office in Dili. No personally identifiable information will be shared in any project reports, publication, or presentations. We will keep each individual's participation in this project confidential to the extent permitted by law. However, it is possible that other people may become aware of their participation in this study, e.g. the following people/groups may inspect project records:

- The Instituto Nacional da Saúde; INS and the Ministry of Health, Timor-Leste
- Human Research Ethics Committee of the Northern Territory Department of Health and Menzies School of Health Research in Australia

**Seksaun 6: Privacidade no Konfidensialidade.** Sei uza kodigu uniku hodi identifika no liga dadus husi kuestionariu no rezultadu amostra ran. Registrus no kuestionariu ne'ebé kompleta ona husi estudu sei reviza, armazena, no halo analizaun uza komputador iha Menzies nia office Dili, no sei rai iha area seguru no iha komputador ne'ebé mak proteje uza password. Amostra ran ne'ebé mak koletadu hodi halo teste iha laboratoriu sei tau rotulagem/label ho kodigu uniku no seguramente sei rai iha Laboratoriu Nasional Saude, Dili Timor-Leste. Lista ne'ebé mak kombinadu ho partisipante nia naran ho kodigu uniku ne'e sei rai iha arkivu 1 protektidu ho password iha komputador iha Menzies nia Office, Dili. Kualker informasaun personal ne'ebé mak identifikavel sei la kompartilha iha kualker projetu nia relatoriu, publikasaun, ou apresentasaun sira. Ami sei mantein kada individual nia partisipasaun iha projetu ida ne'e konfidensial tuir lei haruka. No entantu, iha possibilidade ba ema balu atu notifika konaba ita bo'ot sira nia partisipasaun iha estudu ida ne'e, por ezemplu ema/grupu hirak hanesan tuir mai ne'e sei bele halo inspeksaun ba projetu nia registrus:

- Instituto Nacional da Saúde (INS) no Ministeriu Saude, Timor-Leste
- Human Research Ethics Committee of the Northern Territory Department of Health no Menzies School of Health Research, iha Australia

Some of these records could contain information that tells them who participated in the project. However, the results of blood test and answers to the questionnaires will not be linked to this information. Your test results, including the hepatitis B results will not be shared with any person outside the study team.

Husi registrasaun sira ne'e balun sei inklui informasaun ne'ebé mak sei informa konaba partisipante sira iha projetu ida ne'e. No entantu, rezultadu teste ran nian no resposta iha kuestionariu sira, sei la



## DRAFT

inklui iha informasaun refere. Ita bo'ot nia rezultadu teste, inklui rezultadu hepatitis B sei la kompartilha ho kualker ema ne'ebé mak laos ekipa estudu.

**Section 12: Contact information for questions or concerns.** You have the right to ask any questions you may have about this study. If you have questions, complaints or concerns or believe you may have developed an injury related to this study, please contact **Local Study Coordinator Name, National Health Laboratory, Dili, Phone: TBC; Email: TBC**. If you have questions regarding your rights as a study participant or concerns regarding the ethical conduct of the project, please contact Secretario ethiku, Komisaun etiku peskija komite tekniku INS (Ph +670 7708 7665) or the Northern Territory Department of Health and Menzies School of Health Research Human Research Ethics Committee (Phone +618 8946 8600; Email [ethics@menzies.edu.au](mailto:ethics@menzies.edu.au)). If you have any medical problems associated with this study, such as a pain from where your blood was collected or feeling unwell, please contact the above phone numbers or attend your local hospital or clinic if urgent.

**Seksaun 12: Informasaun kontaktu karik iha pergunta ou preokupasaun ruma.** Ita bo'ot iha direitu hodi husu kualker pergunta ne'ebé mak relasiona ho estudu ida ne'e. Karik ita bo'ot iha pergunta, reklamasaun ou preokupasaun ou karik ita bo'ot hetan injuria relasiona ho estudu ida ne'e, favor kontaktu **Local Study Coordinator Name, National Health Laboratory, Dili, Phone: TBC; Email: TBC**. Karik ita bo'ot iha pergunta relasiona ho ita bo'ot nia direitu nudar partisipante ou preokupasaun relasiona ho projetu nia étika konduta, favor kontaktu Sekretariu étiku, komisaun etika peskija komite tekniku INS (Ph +670 7708 7665) ou Northern Territory Department of Health no Menzies School of Health Research Human Research Ethics Committee (telemovel +618 8946 8600; Email [ethics@menzies.edu.au](mailto:ethics@menzies.edu.au)). Karik ita bo'ot iha kualker problema mediku ne'ebé mak asasiadu ho estudu ida ne'e, por ezemplu hanesan moras iha fatin hasai ran ou sente la saudavel, favor kontaktu ba numeru ne'ebé mensiona iha leten ou konsulta iha hospital lokal ou klinika sira karik urgente.

**Section 13: Consent to participate in project.** Before making the decision about participating in this study you should have:

- Discussed this project with a member of the study team
- Read and understood the information in this form
- Had the opportunity to ask any questions that you may have
- Had time to consider whether to take part
- Information about who to contact in case you have any further questions or problems

**Seksaun 13: konsentimentu atu partisipa iha projetu.** Antes foti desizaun atu partisipa iha estudu ida ne'e ita bo'ot tenke:

- Diskute uluk konaba projetu ida ne'e ho membru husi ekipa estudu nian
- Le'e no komprende informasaun iha formulariu ida ne'e
- Iha oportunidade hodi husu kualker pergunta ne'ebé mak ita bo'ot iha
- Iha tempu hodi hanoin antes deside atu partisipa
- Infomasaun konaba se mak ita bo'ot atu kontaktu, kuandu ita bo'ot iha tan pergunta ou problema ruma.

**Section 14: Ethics Committee Clearance.** The ethical aspects of this research have been approved by the National Institute of Health, Timor-Leste (Instituto Nacional da Saúde; INS) and the Human Research Ethics Committee of the Northern Territory Department of Health and Menzies School of Health Research in Australia (Protocol HREC-2021-4064). If you have any concerns about this research, please contact: Secretario ethiku, Komisaun etiku peskija komite tekniku INS (Ph +670 7708 7665) or the Northern Territory Department of Health and Menzies School of Health Research Human Research Ethics Committee (Phone +618 8946 8600; Email [ethics@menzies.edu.au](mailto:ethics@menzies.edu.au)).



## DRAFT

1  
2  
3 **Seksaun 14: Lisensa Komite Étika.** Aspektu etikal husi peskiza ida ne'e hetan ona aprovasaun husi  
4 Institutu Nasional Saude Timor-Leste (INS) no Human Research Ethics Committee of the Northern  
5 Territory Department of Health no Menzies School of Health Research, iha Australia (Protokolu HREC-  
6 2021-4064). Karik ita bo'ot iha kualker preokupasaun konaba peskiza ida ne'e, favor kontaktu:  
7 Sekretariu Étiku, Komisaun Étiku Peskija Komite Tekniku INS (Telemovel +670 7708 7665) ou the  
8 Northern Territory Department of Health no Menzies School of Health Research Human Research  
9 Ethics Committee (Telemovel +618 8946 8600; Email: [ethics@menzies.edu.au](mailto:ethics@menzies.edu.au)).  
10  
11  
12  
13  
14  
15  
16  
17  
18  
19  
20  
21  
22  
23  
24  
25  
26  
27  
28  
29  
30  
31  
32  
33  
34  
35  
36  
37  
38  
39  
40  
41  
42  
43  
44  
45  
46  
47  
48  
49  
50  
51  
52  
53  
54  
55  
56  
57  
58  
59  
60

For peer review only

DRAFT

**Appendix 2: Consent form**

**Apendise 2: Formulariu Konsentimentu**

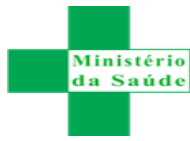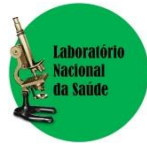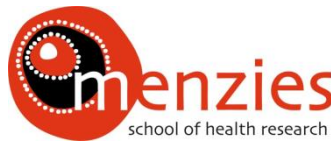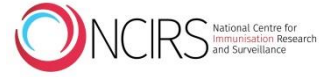

Local Study Coordinator Name, National Health Laboratory, Dili, Phone: TBC; Email: TBC

**SEROLOGICAL STUDY OF VACCINE-PREVENTABLE DISEASES IN TIMOR-LESTE**

**Informed Consent / Assent Form**

**This means you can say NO /**

|                                                                                                                                                                                                                                                                                                                                                                                                                                                                                                                                                                  |
|------------------------------------------------------------------------------------------------------------------------------------------------------------------------------------------------------------------------------------------------------------------------------------------------------------------------------------------------------------------------------------------------------------------------------------------------------------------------------------------------------------------------------------------------------------------|
| PRINCIPAL INVESTIGATOR / INVESTIGADOR PRINSIPAL: Dr Nelson Martins<br>STUDY COLLABORATORS / KOLABORADORES BA ESTUDU:<br><ul style="list-style-type: none"> <li>Ministry of Health (MOH), Timor-Leste / Ministeriu da Saúde, Timor-Leste</li> <li>Menzies School of Health Research, Australia</li> <li>National Health Laboratory, Dili, Timor-Leste / Laboratoriu Nasional Saude, Dili, Timor-Leste</li> <li>National Centre for Immunisation Research and Surveillance, Australia / Sentru Nasional ba Peskiza no Vigilansia Imunizasaun, Australia</li> </ul> |
|------------------------------------------------------------------------------------------------------------------------------------------------------------------------------------------------------------------------------------------------------------------------------------------------------------------------------------------------------------------------------------------------------------------------------------------------------------------------------------------------------------------------------------------------------------------|

I understand the aim of this research study is to improve understanding of the number of people who have been exposed and/or vaccinated against infectious diseases in Timor-Leste. Details of the study have been explained to me, and I have been provided with a written information sheet and given the opportunity to ask questions.

I acknowledge that: / Hau rekonhese katak:

- Any risks and possible effects of having a **venous blood test** have been explained to my satisfaction; *Kualker risku no efeitu ne'ebé mak posivel atu hetan tamba teste ran venozu nian, esplika ona mai hau nia satisfasaun;*
- Taking part in this study is voluntary and I am aware that I can stop taking part at any time without explanation or prejudice and to withdraw any unprocessed data I have provided; *Partisipasaun iha estudu ida ne'e voluntariu no hau hatene katak hau bele hapara hau nia partisipasaun iha kualker tempu sem explikasaun ou prekonseitu, no dada fila fali hau nia dadus ne'ebé mak seidauk prosesa*
- Any information I give will be kept strictly confidential and that no names will be used to identify me in this study without my approval. *Kualker informasaun ne'ebé mak hau fó, sei rai estreitamente konfidensial no sei la uza kualker naran hodi identifika hau iha estudu ida ne'e sem hau nia aprovasaun*

**By providing my name and signature, I agree to:**

**Liu husi fó hau nia naran no asinatura, hau konkorda atu:**

|                                                                                                                                          |                          |                          |                          |                         |
|------------------------------------------------------------------------------------------------------------------------------------------|--------------------------|--------------------------|--------------------------|-------------------------|
| A venous blood test for past exposure or vaccination against COVID-19                                                                    | <input type="checkbox"/> | <b>Yes</b><br><i>Sim</i> | <input type="checkbox"/> | <b>No</b><br><i>Lae</i> |
| A venous blood test for past exposure or vaccination against measles<br><i>Teste ran venozu hodi hatene hau nia imunidade ba Sarampo</i> | <input type="checkbox"/> | <b>Yes</b><br><i>Sim</i> | <input type="checkbox"/> | <b>No</b><br><i>Lae</i> |

## DRAFT

|    |                                                                                              |                          |     |                          |
|----|----------------------------------------------------------------------------------------------|--------------------------|-----|--------------------------|
| 1  |                                                                                              |                          |     |                          |
| 2  |                                                                                              |                          |     |                          |
| 3  | A venous blood test for past exposure or vaccination against rubella                         | <input type="checkbox"/> | Yes | <input type="checkbox"/> |
| 4  | <a href="#">Teste ran venozu hodi hatene hau nia imunidade ba rubella</a>                    |                          | Sim | <input type="checkbox"/> |
| 5  |                                                                                              |                          |     | No                       |
| 6  | A blood test for past exposure to dengue                                                     | <input type="checkbox"/> |     | <input type="checkbox"/> |
| 7  | A venous blood test for past exposure to hepatitis B and active infection with hepatitis B   | <input type="checkbox"/> | Yes | <input type="checkbox"/> |
| 8  | <a href="#">Teste ran venozu hodi hatene hau nia imunidade ba hepatitis B no infeksaun</a>   |                          | Sim | <input type="checkbox"/> |
| 9  |                                                                                              |                          |     | No                       |
| 10 | My blood being used to make a 'dried blood spot'                                             | <input type="checkbox"/> |     | <input type="checkbox"/> |
| 11 | The anonymised blood sample and 'dried blood spot' being stored for 10 years and being       | <input type="checkbox"/> | Yes | <input type="checkbox"/> |
| 12 | used to validate tests for infections, and potentially tested for other communicable or non- |                          | Sim | <input type="checkbox"/> |
| 13 | communicable diseases                                                                        |                          |     | No                       |
| 14 |                                                                                              |                          |     | Lae                      |
| 15 | Completing a questionnaire with the help of a research assistant                             | <input type="checkbox"/> | Yes | <input type="checkbox"/> |
| 16 | <a href="#">Kompleta kuestinariu ho ajuda husi asistente peskiza nian</a>                    |                          | Sim | <input type="checkbox"/> |
| 17 |                                                                                              |                          |     | No                       |
| 18 | Being contacted again about vaccine-preventable diseases                                     | <input type="checkbox"/> | Yes | <input type="checkbox"/> |
| 19 |                                                                                              |                          | Sim | <input type="checkbox"/> |
| 20 | Being contacted again about my hepatitis B results                                           | <input type="checkbox"/> | Yes | <input type="checkbox"/> |
| 21 |                                                                                              |                          | Sim | <input type="checkbox"/> |
| 22 |                                                                                              |                          |     | No                       |
| 23 |                                                                                              |                          |     | Lae                      |

|    |                                                                            |                                                                  |
|----|----------------------------------------------------------------------------|------------------------------------------------------------------|
| 24 | <b>Name of participant / <a href="#">Naran partisipante</a>: (printed)</b> | <b>Unique identifier: / <a href="#">Identifikador uniku</a>:</b> |
| 25 |                                                                            |                                                                  |
| 26 |                                                                            |                                                                  |
| 27 |                                                                            |                                                                  |
| 28 |                                                                            |                                                                  |
| 29 |                                                                            |                                                                  |
| 30 |                                                                            |                                                                  |
| 31 | <b>Signature of participant or parent/guardian:</b>                        | <b>Date / <a href="#">Data</a>:</b>                              |
| 32 |                                                                            |                                                                  |
| 33 |                                                                            |                                                                  |
| 34 | <b>Name of witness/interpreter: / <a href="#">Naran</a></b>                | <b>Signature of witness/interpreter: /</b>                       |
| 35 | <b><a href="#">testemunha/tradutor</a>: (printed)</b>                      | <b><a href="#">Asinatura husi testemunha/tradutor</a>:</b>       |
| 36 |                                                                            |                                                                  |
| 37 |                                                                            |                                                                  |
| 38 |                                                                            |                                                                  |
| 39 | <b>Name of researcher / <a href="#">Naran peskizador</a>: (printed)</b>    | <b>Signature of researcher / <a href="#">Asinatura</a></b>       |
| 40 |                                                                            | <b><a href="#">husi peskizador</a>:</b>                          |
| 41 |                                                                            |                                                                  |
| 42 |                                                                            |                                                                  |
| 43 |                                                                            |                                                                  |
| 44 |                                                                            |                                                                  |
| 45 |                                                                            |                                                                  |
| 46 |                                                                            |                                                                  |
| 47 |                                                                            |                                                                  |
| 48 |                                                                            |                                                                  |
| 49 |                                                                            |                                                                  |
| 50 |                                                                            |                                                                  |
| 51 |                                                                            |                                                                  |
| 52 |                                                                            |                                                                  |
| 53 |                                                                            |                                                                  |
| 54 |                                                                            |                                                                  |
| 55 |                                                                            |                                                                  |
| 56 |                                                                            |                                                                  |
| 57 |                                                                            |                                                                  |
| 58 |                                                                            |                                                                  |
| 59 |                                                                            |                                                                  |
| 60 |                                                                            |                                                                  |

DRAFT

**Appendix 3: Participant information sheet: Participants outside Dili**

Local Study Coordinator Name, National Health Laboratory, Dili, Phone: TBC; Email: TBC

**SEROLOGICAL STUDY OF VACCINE-PREVENTABLE DISEASES IN TIMOR-LESTE****This is for you to keep / Ida ne'e fó ba ita bo'ot atu rai**

You are being invited to take part in a study about vaccine-preventable diseases, which include COVID-19, Hepatitis B, Measles, Rubella and Dengue.

**Participation:** Taking part in this project is entirely voluntary. You can withdraw from the study at any time. You do not have to explain why you want to withdraw from the study, and there are no negative consequences if you withdraw. If you have any questions, please discuss them with members of our team.

**Partisipasaun:** Partisipa iha projetu ida ne'e completamente voluntariu. Ita bo'ot bele sai husi estudu iha kualker tempu. Ita bo'ot la presiza atu esplika razau tamba saida, no sei la iha konsekuensia negativu karik ita bo'ot sai. Karik ita bo'ot iha kualker pergunta, favor bele hato'o ba membru husi ami nia ekipa.

**What are vaccine preventable diseases?** Vaccine preventable diseases are infectious diseases which can be prevented through vaccination. These include COVID-19, Hepatitis B, Measles, Rubella and Dengue.

**COVID-19** is the disease caused by severe acute respiratory syndrome coronavirus 2 (SARS-CoV-2), which is a type of coronavirus. The virus was first identified in December 2019 and is new for humans. Coronavirus is spread from person to person mostly by droplets and contaminated surfaces. Coronavirus can cause both mild and severe disease, especially in older people and people with medical conditions. Some people with coronavirus may have no symptoms. Common symptoms of coronavirus are fever and cough. Other symptoms include headache, sore throat, tiredness, shortness of breath, sore muscles, loss of taste and smell, chills and vomiting.

COVID-19 started spreading in Timor-Leste in February 2021, and vaccines have been available since April 2021.

**Hepatitis B** is a virus which is spread by contact with blood. This usually occurs from mother to child (during childbirth), but can also occur by contaminated needles or blood transfusions. In some people the virus causes a short infection, the goes away. In other people, the virus causes a long-lasting infection, which can cause damage to the liver over time. Vaccines are given to new-born babies in Timor-Leste, to prevent them from getting Hepatitis B.

**Measles and rubella** are infections which can cause outbreaks in children. They usually cause fever and rash, and can occasionally cause serious illness. Vaccines are given to young children to prevent them from getting measles and rubella.

**Dengue** is a virus spread by mosquitoes which can cause illness in children and adults. Usually it causes fever with headache and rash, sometimes the illness can be serious. Currently vaccines are not used against dengue in Timor-Leste.

## DRAFT

**Who is organising the project?** The study is a collaboration between:

**Se mak organiza projetu ida ne'e?** Estudu ida ne'e kolaborasaun entre:

- Ministry of Health, Timor-Leste / [Ministeriu da Saúde, Timor-Leste](#)
- Menzies School of Health Research, Australia
- National Health Laboratory, Dili / [Laboratóriu Nasional Saúde, Dili](#)
- National Centre for Immunisation Research and Surveillance, Australia / [Sentru Nasional ba Peskiza no Vigilansia Imunizasaun, Australia](#)

**Approval for this project.** This study has been approved by the National Institute of Health, Timor-Leste (Instituto Nacional da Saúde; INS) and the Human Research Ethics Committee of the Northern Territory Department of Health and Menzies School of Health Research in Australia.

**Aprovasaun ba projetu ida ne'e.** Estudu ida ne'e hetan ona aprovasaun husi Institutu Nasional da Saúde (INS), Timor-Leste no Human Research Ethics Committee of the Northern Territory Department of Health no Menzies School of Health Research iha Australia.

**Informed Consent Information / Informasaun Konsentimentu ne'ebé mak Informadu**

**Section 1: Purpose of the study.**

The main purpose of this study is to see how many people in Timor-Leste have antibodies against different vaccine-preventable diseases. If a person has antibodies to a particular infection, it means they have either been exposed in the past, or have been vaccinated. It sometimes means that the person has protection against the infection ('immunity').

We will test the blood for antibodies against COVID-19, hepatitis B, measles, rubella and dengue. These tests will be done in the laboratory in Dili (National Health Laboratory)

Approximately 5600 people in Timor-Leste will be invited to participate in the project.

**Section 2: Procedures.** For each person, we will:

**Seksaun 2: Prosedimentu.** Ba kada partisipante, ami sei:

- Ask some **QUESTIONS** including name, age, gender, contact details, occupation, vaccination details.
- Take a **BLOOD SAMPLE** (5mL). The blood samples will be used to test for previous exposure or vaccination against COVID-19, hepatitis B, measles, rubella and dengue. The blood sample will also be used to test for hepatitis B infection, and to validate check the accuracy of different tests.
- Take a **DRIED BLOOD SPOT** (3 drops of blood). This will be made by applying drops of blood to a small piece of filter paper, then drying.
- The **blood samples may also be used for validating different tests, and for potential future use to answer medical research questions relating to communicable or non-communicable diseases in Timor-Leste.** All results will be de-identified, and only grouped results will be reported. Anonymized blood samples will be stored at the National Health Laboratory for 10 years before being disposed of.

**Section 3: Duration of Procedures.** Collection of the blood sample will take less than 10 minutes. The questionnaire should take about 5 minutes to complete and can be answered in Tetun or English.

**Seksaun 3: Durasan ba Prosedimentu.** Koleksaun ba amostra ran sei uza tempu pelu menus minutu 10. Kuestionariu sei uza tempu durante minutu 5 hodi kompleta, no bele resposta uza lian Tetun ou Ingles.

## DRAFT

### **Section 4: Potential benefit to you and others. / [Seksaun 4: Benefisiu potensial ba ita bo'ot no ema seluk.](#)**

The blood tests provide evidence of past infection or vaccination, but do not test for current infection. There is no need for any treatment if these tests are positive.

The results of the study will provide important and useful information for Timor-Leste on the success of managing patients with COVID-19 in health care facilities without the transmission of coronavirus transmission.

**Section 5: Discomforts and Risks.** The potential risks of collecting a venous blood sample include temporary discomfort from the needle, bruising, bleeding, and very rarely, infection. Experienced doctors, nurses, or laboratory technicians will take the blood samples. The risk of problems is very small. In the unlikely event of any significant injury because of the blood collection procedure, the study team and/or the Ministry of Health will arrange necessary medical treatment without financial cost. However, no financial compensation will be given in case of any study-related injury.

[Seksaun 5: Deskonfortus no Risku.](#) Potensia ba risku husi kolekta ran venozu sei inklui mos deskonfortu temporariu husi daun, kulit mean (bubu), ran sai, no infeksaun raramente. Doutor, enfermeiru/a, ou tekniku laboratoriu sira ne'ebé mak iha ona esperiensia mak sei foti amostra ran. Risku ba problema ne'e kiik tebes. Karik mosu kualker prejuizu signifikante relasiona ho prosedimentu ba koleksaun ran nian, ekipa estudu/Ministeriu Saude sei aranja tratamentu medikal ne'ebé mak nesesariu sem kustu finansial. No entantu, sei la iha kompensasaun finansial ba kualker injuria ne'ebé mak mosu relasiona ho prosesu estudu.

**Section 6: Costs for participation.** Taking part in the project will cost nothing apart from your time.

[Seksaun 6: Kustu ba partisipasaun.](#) Partisipasaun iha projetu ida ne'e, sei la kobre kustu ruma exepthu ita bo'ot nia tempu.

**Section 7: Compensation for participation.** You will not receive any payments for being part of this project.

[Seksaun 7: Kompensasaun ba Partisipasaun.](#) Ita bo'ot sei la simu kualker pagamentu ba partisipasaun iha projetu ida ne'e.

**Section 8: Study funding.** This study is funded by the Australian Government Department of Foreign Affairs and Trading (DFAT). The Ministry of Health, Timor-Leste has been closely involved in the planning and development of this study and is involved in undertaking this study. The collaborators do not have any conflict of interests to declare.

[Seksaun 8: Finansiamentu ba estudu.](#) Estudu ida ne'e hetan finansiamentu husi Departamentu Asuntu Estranjeiru no Komersiu, Governo Australia (DFAT). Ministeriu Saude Timor-Leste, proximamente involve ona iha planeamentu no dezvoltamentu ba estudu ida ne'e no envolve ba implementasaun estudu ida ne'e. Kolaboradores sira la iha kualker konfliktu interese atu deklarara.

**Section 9: Voluntary participation.** Taking part in this project is your choice, and you will have the right to stop at any time. If individuals or communities decide not to participate or decide to stop taking part at any time, there will be no penalties.

[Seksaun 9: Partisipasaun Voluntariu.](#) Partisipa iha projetu ida ne'e ita bo'ot mak hili, no ita bo'ot sei iha direitu atu hapara/sai iha kualker tempu. Karik individual sira ou komidade decide atu la partisipa ou decide atu sai husi partisipasaun iha kualker tempu, ida ne'e sei la iha penalidade ruma.

### **Section 10: Delivery of results.**

You will not be contacted with results of the blood tests. This is because we are planning on testing 5600 people, the tests may take several months to complete, and it would be very difficult to contact



## DRAFT

everyone. Additionally, these tests are not for active infections, so there is no need for any treatment if they are positive.

Results for the whole study will be written-up and may be published. It may be used by the Ministry of Health to plan additional vaccines and other disease-control activities in Timor-Leste. During this whole process, individual results will remain strictly confidential.

**Section 11: Privacy and confidentiality.** A unique code will be used to identify and link the questionnaire data and blood sample results. Study records and completed questionnaires will be reviewed, stored, and analyzed on a computer at the Menzies office in Dili and will be kept in secured areas and password protected computers. Blood samples collected for laboratory testing will be labeled with the unique code and securely stored at the National Health Laboratory in Dili, Timor-Leste. The list that matches participants' names with unique codes will be kept in a password protected file on a computer in the Menzies office in Dili. No personally identifiable information will be shared in any project reports, publication, or presentations. We will keep each individual's participation in this project confidential to the extent permitted by law. However, it is possible that other people may become aware of their participation in this study, e.g. the following people/groups may inspect project records:

- The Instituto Nacional da Saúde; INS and the Ministry of Health, Timor-Leste
- Human Research Ethics Committee of the Northern Territory Department of Health and Menzies School of Health Research in Australia

**Seksaun 6: Privacidade no Konfidensialidade.** Sei uza kodigu uniku hodi identifika no liga dados husi kuestionariu no rezultadu amostra ran. Registrus no kuestionariu ne'ebé kompleta ona husi estudu sei reviza, armazena, no halo analizasaun uza komputador iha Menzies nia office Dili, no sei rai iha area seguru no iha komputador ne'ebé mak proteje uza password. Amostra ran ne'ebé mak koletadu hodi halo teste iha laboratoriu sei tau rotulagem/label ho kodigu uniku no seguramente sei rai iha Laboratoriu Nasional Saude, Dili Timor-Leste. Lista ne'ebé mak kombinadu ho partisipante nia naran ho kodigu uniku ne'e sei rai iha arkivu 1 protektidu ho password iha komputador iha Menzies nia Office, Dili. Kualker informasaun personal ne'ebé mak identifikavel sei la kompartilha iha kualker projetu nia relatoriu, publikasaun, ou apresentasaun sira. Ami sei mantein kada individual nia partisipasaun iha projetu ida ne'e konfidensial tuir lei haruka. No entantu, iha possibilidade ba ema balu atu notifika konaba ita bo'ot sira nia partisipasaun iha estudu ida ne'e, por ezemplu ema/grupu hirak hanesan tuir mai ne'e sei bele halo inspeksaun ba projetu nia registrus:

- Instituto Nacional da Saúde (INS) no Ministeriu Saude, Timor-Leste
- Human Research Ethics Committee of the Northern Territory Department of Health no Menzies School of Health Research, iha Australia

Some of these records could contain information that tells them who participated in the project. However, the results of blood test and answers to the questionnaires will not be linked to this information. Your test results, including the hepatitis B results will not be shared with any person outside the study team.

Husi registrasaun sira ne'e balun sei inklui informasaun ne'ebé mak sei informa konaba partisipante sira iha projetu ida ne'e. No entantu, rezultadu teste ran nian no resposta iha kuestionariu sira, sei la inklui iha informasaun refere. Ita bo'ot nia rezultadu teste, inklui rezultadu hepatitis B sei la kompartilha ho kualker ema ne'ebé mak laos ekipa estudu.

**Section 12: Contact information for questions or concerns.** You have the right to ask any questions you may have about this study. If you have questions, complaints or concerns or believe you may have developed an injury related to this study, please contact **Local Study Coordinator Name, National Health Laboratory, Dili, Phone: TBC; Email: TBC**. If you have questions regarding your rights as a study participant or concerns regarding the ethical conduct of the project, please contact Secretario ethiku,

## DRAFT

Komisaun etiku peskija komite tekniku INS (Ph +670 7708 7665) or the Northern Territory Department of Health and Menzies School of Health Research Human Research Ethics Committee (Phone +618 8946 8600; Email [ethics@menzies.edu.au](mailto:ethics@menzies.edu.au)). If you have any medical problems associated with this study, such as a pain from where your blood was collected or feeling unwell, please contact the above phone numbers or attend your local hospital or clinic if urgent.

**Seksaun 12: Informasaun kontaktu karik iha pergunta ou preokupasaun ruma.** Ita bo'ot iha direitu hodi husu kualker pergunta ne'ebé mak relasiona ho estudu ida ne'e. Karik ita bo'ot iha pergunta, reklamasaun ou preokupasaun ou karik ita bo'ot hetan injuria relasiona ho estudu ida ne'e, favor kontaktu [Local Study Coordinator Name, National Health Laboratory, Dili, Phone: TBC; Email: TBC](#). Karik ita bo'ot iha pergunta relasiona ho ita bo'ot nia direitu nudar partisipante ou preokupasaun relasiona ho projetu nia étika konduta, favor kontaktu Sekretariu étiku, komisaun etika peskija komite tekniku INS (Ph +670 7708 7665) ou Northern Territory Department of Health no Menzies School of Health Research Human Research Ethics Committee (telemovel +618 8946 8600; Email [ethics@menzies.edu.au](mailto:ethics@menzies.edu.au)). Karik ita bo'ot iha kualker problema mediku ne'ebé mak asociadu ho estudu ida ne'e, por ezemplu hanesan moras iha fatin hasai ran ou sente la saudavel, favor kontaktu ba numeru ne'ebé mensiona iha leten ou konsulta iha hospital lokal ou klinika sira karik urgente.

**Section 13: Consent to participate in project.** Before making the decision about participating in this study you should have:

- Discussed this project with a member of the study team
- Read and understood the information in this form
- Had the opportunity to ask any questions that you may have
- Had time to consider whether to take part
- Information about who to contact in case you have any further questions or problems

**Seksaun 13: konsentimentu atu partisipa iha projetu.** Antes foti desizaun atu partisipa iha estudu ida ne'e ita bo'ot tenke:

- Diskute uluk konaba projetu ida ne'e ho membru husi ekipa estudu nian
- Le'e no komprende informasaun iha formulariu ida ne'e
- Iha oportunitade hodi husu kualker pergunta ne'ebé mak ita bo'ot iha
- Iha tempu hodi hanoin antes decide atu partisipa
- Infomasaun konaba se mak ita bo'ot atu kontaktu, kuandu ita bo'ot iha tan pergunta ou problema ruma.

**Section 14: Ethics Committee Clearance.** The ethical aspects of this research have been approved by the National Institute of Health, Timor-Leste (Instituto Nacional da Saúde; INS) and the Human Research Ethics Committee of the Northern Territory Department of Health and Menzies School of Health Research in Australia (Protocol HREC-2021-4064). If you have any concerns about this research, please contact: Secretario ethiku, Komisaun etiku peskija komite tekniku INS (Ph +670 7708 7665) or the Northern Territory Department of Health and Menzies School of Health Research Human Research Ethics Committee (Phone +618 8946 8600; Email [ethics@menzies.edu.au](mailto:ethics@menzies.edu.au)).

**Seksaun 14: Lisensa Komite Étika.** Aspektu etikal husi peskiza ida ne'e hetan ona aprovasaun husi Institutu Nasional Saude Timor-Leste (INS) no Human Research Ethics Committee of the Northern Territory Department of Health no Menzies School of Health Research, iha Australia (Protokolu HREC-2021-4064). Karik ita bo'ot iha kualker preokupasaun konaba peskiza ida ne'e, favor kontaktu: Sekretariu Étiku, Komisaun Étiku Peskija Komite Tekniku INS (Telemovel +670 7708 7665) ou the Northern Territory Department of Health no Menzies School of Health Research Human Research Ethics Committee (Telemovel +618 8946 8600; Email: [ethics@menzies.edu.au](mailto:ethics@menzies.edu.au)).



DRAFT

- 1
- 2
- 3
- 4
- 5
- 6
- 7
- 8
- 9
- 10
- 11
- 12
- 13
- 14
- 15
- 16
- 17
- 18
- 19
- 20
- 21
- 22
- 23
- 24
- 25
- 26
- 27
- 28
- 29
- 30
- 31
- 32
- 33
- 34
- 35
- 36
- 37
- 38
- 39
- 40
- 41
- 42
- 43
- 44
- 45
- 46
- 47
- 48
- 49
- 50
- 51
- 52
- 53
- 54
- 55
- 56
- 57
- 58
- 59
- 60

For peer review only

DRAFT

**Appendix 4: Consent form**

**Apendise 2: Formulariu Konsentimentu**

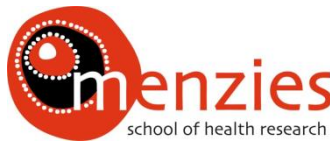

Local Study Coordinator Name, National Health Laboratory, Dili, Phone: TBC; Email: TBC

**SEROLOGICAL STUDY OF VACCINE-PREVENTABLE DISEASES IN TIMOR-LESTE**

**Informed Consent / Assent Form**

**This means you can say NO /**

|                                                                                                                                                                                                                                                                                                                                                                                                                                                                                                                                                                  |
|------------------------------------------------------------------------------------------------------------------------------------------------------------------------------------------------------------------------------------------------------------------------------------------------------------------------------------------------------------------------------------------------------------------------------------------------------------------------------------------------------------------------------------------------------------------|
| PRINCIPAL INVESTIGATOR / INVESTIGADOR PRINSIPAL: Dr Nelson Martins<br>STUDY COLLABORATORS / KOLABORADORES BA ESTUDU:<br><ul style="list-style-type: none"> <li>Ministry of Health (MOH), Timor-Leste / Ministeriu da Saúde, Timor-Leste</li> <li>Menzies School of Health Research, Australia</li> <li>National Health Laboratory, Dili, Timor-Leste / Laboratoriu Nasional Saude, Dili, Timor-Leste</li> <li>National Centre for Immunisation Research and Surveillance, Australia / Sentru Nasional ba Peskiza no Vigilansia Imunizasaun, Australia</li> </ul> |
|------------------------------------------------------------------------------------------------------------------------------------------------------------------------------------------------------------------------------------------------------------------------------------------------------------------------------------------------------------------------------------------------------------------------------------------------------------------------------------------------------------------------------------------------------------------|

I understand the aim of this research study is **to improve understanding of the number of people who have been exposed and/or vaccinated against infectious diseases in Timor-Leste**. Details of the study have been explained to me, and I have been provided with a written information sheet and given the opportunity to ask questions.

I acknowledge that: / Hau rekonhese katak:

- Any risks and possible effects of having a **venous blood test** have been explained to my satisfaction; *Kualker risku no efeitu ne'ebé mak posivel atu hetan tamba teste ran venozu nian, esplika ona mai hau nia satisfasaun;*
- Taking part in this study is voluntary and I am aware that I can stop taking part at any time without explanation or prejudice and to withdraw any unprocessed data I have provided; *Partisipasaun iha estudu ida ne'e voluntariu no hau hatene katak hau bele hapara hau nia partisipasaun iha kualker tempu sem explikasaun ou prekonseitu, no dada fila fali hau nia dadus ne'ebé mak seidauk prosesa*
- Any information I give will be kept strictly confidential and that no names will be used to identify me in this study without my approval. *Kualker informasaun ne'ebé mak hau fó, sei rai estreitamente konfidensial no sei la uza kualker naran hodi identifika hau iha estudu ida ne'e sem hau nia aprovasaun*

**By providing my name and signature, I agree to:**

**Liu husi fó hau nia naran no asinatura, hau konkorda atu:**

|                                                                                                                                          |                          |                          |                          |                         |
|------------------------------------------------------------------------------------------------------------------------------------------|--------------------------|--------------------------|--------------------------|-------------------------|
| A venous blood test for past exposure or vaccination against COVID-19                                                                    | <input type="checkbox"/> | <b>Yes</b><br><i>Sim</i> | <input type="checkbox"/> | <b>No</b><br><i>Lae</i> |
| A venous blood test for past exposure or vaccination against measles<br><i>Teste ran venozu hodi hatene hau nia imunidade ba Sarampo</i> | <input type="checkbox"/> | <b>Yes</b><br><i>Sim</i> | <input type="checkbox"/> | <b>No</b><br><i>Lae</i> |

## DRAFT

|                       |                                                                                                                                                                                                              |                          |            |                          |           |
|-----------------------|--------------------------------------------------------------------------------------------------------------------------------------------------------------------------------------------------------------|--------------------------|------------|--------------------------|-----------|
| 1<br>2<br>3<br>4<br>5 | A venous blood test for past exposure or vaccination against rubella<br><i>Teste ran venozu hodi hatene hau nia imunidade ba rubella</i>                                                                     | <input type="checkbox"/> | Yes<br>Sim | <input type="checkbox"/> | No<br>Lae |
| 6<br>7<br>8<br>9      | A blood test for past exposure to dengue<br>A venous blood test for past exposure to or vaccination against hepatitis B<br><i>Teste ran venozu hodi hatene hau nia imunidade ba hepatitis B no infeksaun</i> | <input type="checkbox"/> | Yes<br>Sim | <input type="checkbox"/> | No<br>Lae |
| 10<br>11              | My blood being used to make a 'dried blood spot'                                                                                                                                                             | <input type="checkbox"/> | Yes<br>Sim | <input type="checkbox"/> | No<br>Lae |
| 12<br>13<br>14        | The anonymised blood sample being stored for 10 years and being used to validate tests for infections, and potentially tested for other communicable or non-communicable diseases                            | <input type="checkbox"/> | Yes<br>Sim | <input type="checkbox"/> | No<br>Lae |
| 15<br>16<br>17        | Completing a questionnaire with the help of a research assistant<br><i>Kompleta kuestinariu ho ajuda husi assistente peskiza nian</i>                                                                        | <input type="checkbox"/> | Yes<br>Sim | <input type="checkbox"/> | No<br>Lae |
| 18<br>19              | Being contacted again about vaccine-preventable diseases                                                                                                                                                     | <input type="checkbox"/> | Yes<br>Sim | <input type="checkbox"/> | No<br>Lae |

|                                                                                                                                                    |                                                                                   |                                                                                       |
|----------------------------------------------------------------------------------------------------------------------------------------------------|-----------------------------------------------------------------------------------|---------------------------------------------------------------------------------------|
| 21<br>22<br>23<br>24<br>25<br>26<br>27                                                                                                             | <b>Name of participant / <i>Naran partisipante: (printed)</i></b>                 | <b>Unique identifier: / <i>Identifikador uniku:</i></b>                               |
| 28<br>29<br>30                                                                                                                                     | <b>Signature of participant or parent/guardian:</b>                               | <b>Date / <i>Data:</i></b>                                                            |
| 31<br>32<br>33<br>34<br>35                                                                                                                         | <b>Name of witness/interpreter: / <i>Naran testemunha/tradutor: (printed)</i></b> | <b>Signature of witness/interpreter: / <i>Asinatura husi testemunha/tradutor:</i></b> |
| 36<br>37<br>38<br>39<br>40<br>41<br>42<br>43<br>44<br>45<br>46<br>47<br>48<br>49<br>50<br>51<br>52<br>53<br>54<br>55<br>56<br>57<br>58<br>59<br>60 | <b>Name of researcher / <i>Naran peskizador: (printed)</i></b>                    | <b>Signature of researcher / <i>Asinatura husi peskizador:</i></b>                    |
