# Supplementary material for: Vaccine Preventable Disease Seroprevalence in a Nationwide Assessment of Timor-Leste (VASINA-TL): study protocol for a population-representative cross-sectional serosurvey
Source: PubMed Central journal article supplement — BMJ Open. 2023 May 18;13(5):e071381. doi: 10.1136/bmjopen-2022-071381 (PMC10201250; doi:10.1136/bmjopen-2022-071381), 2023-05-18
Supplement: bmjopen-2022-071381supp001.pdf [file bmjopen-2022-071381supp001.pdf]

### VASINA fieldwork SOP – location of households

- 1. Navigate to household using GPS device and printed maps**
  - Make sure you identify the exact house (do not accept another household nearby)
- 2. If at least one adult household member is present, move to *Data and Sample Collection SOP***
- 3. If the household was found, but there are no household members present (or if one or more household members are missing):**
  - Arrange and conduct a second and third visit. At least one of these should be on a different day.
  - If there are no household members present on all three visits, complete the '*Unable to Complete Questionnaire*' on RedCap
  - Do not find another household to replace this one
- 4. If the household was found, but it looks derelict**
  - Fill out the '*Unable to Complete Questionnaire*' on RedCap
  - Choose the nearest occupied house and offer study participation to these occupants instead. If there are two equidistant houses, choose the one on the Left. When collecting data for the new household, add "B" to the end of the household number (e.g. "12345B")
- 5. If the household cannot be found**
  - Fill out the '*Unable to Complete Questionnaire*' on RedCap
  - Make sure you enter the reason that the household cannot be found
  - Do not find another household to replace this one
