# Supplementary material for: Vaccine Preventable Disease Seroprevalence in a Nationwide Assessment of Timor-Leste (VASINA-TL): study protocol for a population-representative cross-sectional serosurvey
Source: PubMed Central journal article supplement — BMJ Open. 2023 May 18;13(5):e071381. doi: 10.1136/bmjopen-2022-071381 (PMC10201250; doi:10.1136/bmjopen-2022-071381), 2023-05-18
Supplement: bmjopen-2022-071381supp002.pdf [file bmjopen-2022-071381supp002.pdf]

# Household Questionnaire

---

Record ID

---

---

Household number

Númeru Uma-kain

---

---

How many people currently live in this household?

Emá nain hira mak agora dadauk hela iha uma-kain ida-ne'e?

- 1
- 2
- 3
- 4
- 5
- 6
- 7
- 8
- 9
- 10
- 11
- 12
- 13
- 14
- 15
- 16
- 17
- 18
- 19
- 20

(If the household has more than 20 members, fill out a second Household Questionnaire / Karik iha uma-kain ida nia membru barak liu ema 20, preenxe fali iha kuestionariu uma-kain segundu)

---

Gender of household member 1

- Male / Mane
- Female / Feto

Jeneru membru uma-kain 1

---

Age of household member 1

Idade membru uma-kain 1

(If unsure, please estimate age (to the nearest 10 years))

---

Adult or child?

- Adult
  - Child
- (Only fill this out if age cannot be estimated)

---

Study ID number of household member 1

Númeru ID estudu nian ba membru uma-kain 1

(Only fill if he/she chooses to participate / Preenxe deit kuandu nia hili atu partisipa)

---

Gender of household member 2

- Male / Mane
- Female / Feto

Jeneru membru uma-kain 2

---

Age of household member 2

Idade membru uma-kain 2

(If unsure, please estimate age (to the nearest 10 years))

---

Adult or child?

Adult  
 Child  
(Only fill this out if age cannot be estimated)

---

Study ID number of household member 2

Númeru ID estudu nian ba membru uma-kain 2

( Only fill if he/she chooses to participate / Preenxe deit kuandu nia hili atu partisipa)

---

Gender of household member 3

Jeneru membru uma-kain 3

Male / Mane  
 Female / Feto

---

Age of household member 3

Idade membru uma-kain 3

(If unsure, please estimate age (to the nearest 10 years))

---

Adult or child?

Adult  
 Child  
(Only fill this out if age cannot be estimated)

---

Study ID number of household member 3

Númeru ID estudu nian ba membru uma-kain 3

( Only fill if he/she chooses to participate / Preenxe deit kuandu nia hili atu partisipa)

---

Gender of household member 4

Jeneru membru uma-kain 4

Male / Mane  
 Female / Feto

---

Age of household member 4

Idade membru uma-kain 4

(If unsure, please estimate age (to the nearest 10 years))

---

Adult or child?

Adult  
 Child  
(Only fill this out if age cannot be estimated)

---

Study ID number of household member 4

Númeru ID estudu nian ba membru uma-kain 4

(Only fill if he/she chooses to participate / Preenxe deit kuandu nia hili atu partisipa)

---

Gender of household member 5

Jeneru membru uma-kain 5

Male / Mane  
 Female / Feto

---

Age of household member 5

Idade membru uma-kain 5

(If unsure, please estimate age (to the nearest 10 years))



---

Study ID number of household member 8

Númeru ID estudu nian ba membru uma-kain 8

(Only fill if he/she chooses to participate /  
Preenxe deit kuandu nia hili atu partisipa)

---

Gender of household member 9

Jeneru membru uma-kain 9

Male / Mane  
 Female / Feto

---

Age of household member 9

Idade membru uma-kain 9

(If unsure, please estimate age (to the nearest 10  
years))

---

Adult or child?

Adult  
 Child  
(Only fill this out if age cannot be estimated)

---

Study ID number of household member 9

Númeru ID estudu nian ba membru uma-kain 9

(Only fill if he/she chooses to participate /  
Preenxe deit kuandu nia hili atu partisipa)

---

Gender of household member 10

Jeneru membru uma-kain 10

Male / Mane  
 Female / Feto

---

Age of household member 10

Idade membru uma-kain 10

(If unsure, please estimate age (to the nearest 10  
years))

---

Adult or child?

Adult  
 Child  
(Only fill this out if age cannot be estimated)

---

Study ID number of household member 10

Númeru ID estudu nian ba membru uma-kain 10

(Only fill if he/she chooses to participate /  
Preenxe deit kuandu nia hili atu partisipa)

---

Gender of household member 11

Jeneru membru uma-kain 11

Male / Mane  
 Female / Feto

---

Age of household member 11

Idade membru uma-kain 11

(If unsure, please estimate age (to the nearest 10  
years))

---

Adult or child?

Adult  
 Child  
(Only fill this out if age cannot be estimated)

---

Study ID number of household member 11

Númeru ID estudu nian ba membru uma-kain 11

(Only fill if he/she chooses to participate /  
Preenxe deit kuandu nia hili atu partisipa)



---

Age of household member 15

Idade membru uma-kain 15

(If unsure, please estimate age (to the nearest 10 years))

---

Adult or child?

Adult  
 Child  
(Only fill this out if age cannot be estimated)

---

Study ID number of household member 15

Númeru ID estudu nian ba membru uma-kain 15

(Only fill if he/she chooses to participate / Preenxe deit kuandu nia hili atu partisipa)

---

Gender of household member 16

Jeneru membru uma-kain 16

Male / Mane  
 Female / Feto

---

Age of household member 16

Idade membru uma-kain 16

(If unsure, please estimate age (to the nearest 10 years))

---

Adult or child?

Adult  
 Child  
(Only fill this out if age cannot be estimated)

---

Study ID number of household member 16

Númeru ID estudu nian ba membru uma-kain 16

(Only fill if he/she chooses to participate / Preenxe deit kuandu nia hili atu partisipa)

---

Gender of household member 17

Jeneru membru uma-kain 17

Male / Mane  
 Female / Feto

---

Age of household member 17

Idade membru uma-kain 17

(If unsure, please estimate age (to the nearest 10 years))

---

Adult or child?

Adult  
 Child  
(Only fill this out if age cannot be estimated)

---

Study ID number of household member 17

Númeru ID estudu nian ba membru uma-kain 17

(Only fill if he/she chooses to participate / Preenxe deit kuandu nia hili atu partisipa)

---

Gender of household member 18

Jeneru membru uma-kain 18

Male / Mane  
 Female / Feto

---

Age of household member 18

Idade membru uma-kain 18

(If unsure, please estimate age (to the nearest 10 years))



---

Please specify

Favor esesifika

---
