# Supplementary material for: Vaccine Preventable Disease Seroprevalence in a Nationwide Assessment of Timor-Leste (VASINA-TL): study protocol for a population-representative cross-sectional serosurvey
Source: PubMed Central journal article supplement — BMJ Open. 2023 May 18;13(5):e071381. doi: 10.1136/bmjopen-2022-071381 (PMC10201250; doi:10.1136/bmjopen-2022-071381), 2023-05-18
Supplement: bmjopen-2022-071381supp003.pdf [file bmjopen-2022-071381supp003.pdf]

# Individual Participant Questionnaire

Record ID

\_\_\_\_\_

## Demographic information

### Informasaun Demográfiku

Household number

Númeru Uma-kain

\_\_\_\_\_

Study ID number

Númeru ID estudu

(Use number on sample sticker / Uza númeru iha amostra nia sticker)

Name of interviewer

Naran entrevistador

\_\_\_\_\_

Date of interview

Data halao entrevista

\_\_\_\_\_

First name

Naran prinsipal

\_\_\_\_\_

Family name

Naran Familia

\_\_\_\_\_

Gender

Jeneru

- Female / Feto  
 Male / Mane  
 Other/Unknown / Seluk/La hatene

Date of birth

Data moris

\_\_\_\_\_

Age

Idade

(Only need to fill if date-of-birth is not known / Presiza atu preenxe deit karik la hatene data moris)

Phone number(s)

Numeru Telemovel

\_\_\_\_\_

Email address

\_\_\_\_\_

Nationality  Timorese / Timor oan  
 Other / seluk

Nasionalidade

Specify

Espesifika

Have you traveled outside Timor-Leste (including West Timor, NTT) within the last 6 MONTHS?  Yes / Sim  
 No / Lae  
 Don't know / La hatene

Iha fulan 6 ikus liu, ita bo'ot halao viajen ba rai-liur ka lae (inklui nasaun viziño Indonesia nia provinsia, NTT)?

Where did you travel (in the last 6 months)?  West Timor (NTT)  
 Other / Seluk

Ita bo'ot ba iha rai ne'ebé? (iha fulan 6 ikus liu)

Please specify the country (or countries) you went to (in the last 6 months)

Favor espesifika nasaun sira ne'ebé mak ita bo'ot viajem ba ona (iha fulan 6 ikus liu)

Have you ever traveled outside Timor-Leste in your lifetime (but MORE THAN 6 MONTHS AGO)? This includes travel to West Timor (NTT).  Yes / Sim  
 No / Lae  
 Don't know / La hatene

Ita bo'ot halao ona viajem fora husi Timor-Leste, durante vida moris? (maibe husi fulan 6 liu-bá kotuk)? Ida ne'e inklui viajem provinsia NTT

Where did you travel (MORE THAN 6 MONTHS AGO)?  West Timor (NTT)  
 Other / Seluk

Ita bo'ot viajen ba iha rai ne'ebé (FULAN 6 IKUS LIU BA KOTUK)?

Please specify the country (or countries) you went to MORE THAN 6 MONTHS AGO

Favor espesifika nasaun sira ne'ebé mak ita bo'ot ba ona Iha FULAN 6 IKUS LIU BA KOTUK

### Questions about febrile illness within the last 6 months

#### Pergunta konaba moras isin manas iha fulan 6 ikus liu

Have you been unwell with a FEVER within the last 6 months?  Yes / Sim  
 No / Lae  
 Don't know / La hatene

Ita bo'ot sente moras ho ISIN MANAS iha fulan 6 ikus liu nia laran ka lae?

When you had this illness, did you seek any medical care?

- Yes / Sim  
 No / Lae  
 Don't know / La hatene

Iha momentu ita bo'ot hetan moras ida-ne'e, ita bo'ot ba konsulta iha fasilidade saude ka lae?

(Includes medical clinic, pharmacy, hospital etc. / Inklui klinika mediku, farmasia, hospital, etc.)

When you sought medical care with fever in the last 6 months, did you get diagnosed by a healthcare professional with any of the following infections?

- COVID-19  
 Dengue / Denge  
 Malaria  
 Other / Seluk  
 No specific diagnosis was made / La halo diagnostiku espesifiku

Wainhira ita bo'ot buka tratamentu husi mediku sira ho isin manas iha fulan 6 ikus liu, ita bo'ot hetan diagnostiku husi professional saude ho infeksaun hirak tuir mai ne'e ka lae?

When you were diagnosed with COVID-19, how was this diagnosis made?

- I was tested for COVID-19 and the test was POSITIVE / Hau halo teste ba COVID-19 no teste nia rezultadu POZITIVU  
 I did NOT receive a positive test, but I was diagnosed with COVID-19 anyway / Hau la hetan teste pozitivu, maibe nafatin diagnoza hau ho COVID-19  
 I don't know if I was tested or not / Hau la hatene karik hau teste ona ou seidak

Wainhira ita bo'ot diagnoza ho COVID-19, oinsa mak hetan diagnoza ida ne'e?

When you were diagnosed with DENGUE, how was this diagnosis made?

- I was tested for DENGUE and the test was POSITIVE / Hau halo teste ba DENGUE no teste nia rezultadu POZITIVU  
 I did NOT receive a positive test, but I was diagnosed with DENGUE anyway / Hau la hetan teste pozitivu, maibe nafatin diagnoza hau ho DENGUE  
 I don't know if I was tested or not / Hau la hatene karik hau teste ona ou seidak

Wainhira ita bo'ot diagnoza ho DENGUE, oinsa mak hetan diagnoza ida ne'e?

When you were diagnosed with MALARIA, how was this diagnosis made?

- I was tested for MALARIA and the test was POSITIVE / Hau halo teste ba MALARIA no teste nia rezultadu POZITIVU  
 I did NOT receive a positive test, but I was diagnosed with MALARIA anyway / Hau la hetan teste pozitivu, maibe nafatin diagnoza hau ho MALARIA  
 I don't know if I was tested or not / Hau la hatene karik hau teste ona ou seidak

Wainhira ita bo'ot diagnoza ho MALARIA, oinsa mak hetan diagnoza ida ne'e?

### Questions about PREVIOUS illness and vaccination

Have you ever been diagnosed with COVID-19 by a healthcare worker in your life (even MORE THAN 6 MONTHS AGO)?

- Yes / Sim  
 No / Lae  
 Don't know / La hatene  
 (Answer 'yes', even if a COVID diagnosis within 6 months was reported in previous answers / Hatán 'Sim', maske diagnoza ho COVID-19 iha fulan 6 nia laran ne'e relata ona iha resposta anterior)

Antes ne'e doutor sira diagnoza ona ita bo'ot ho COVID-19 ka lae, iha ita bo'ot nia moris (BELE LIU HUSI FULAN 6 BA KOTUK)

When did you get diagnosed with COVID-19?

Ita bo'ot hetan diagnostiku ho COVID-19 ne'e iha loran saida?

(Enter approximate date if unsure, leave blank if unknown / Hatama data tuir hanoin karik la serteza, husik mamuk deit karik la hatene)

Have you ever been diagnosed by a healthcare worker with DENGUE in your life (even MORE THAN 6 MONTHS AGO)?

- Yes / Sim  
 No / Lae  
 Don't know / La hatene  
 (Answer 'yes', even if a DENGUE diagnosis within 6 months was reported in previous answers / Hatán 'Sim', maske diagnoza ho DENGUE iha fulan 6 nia laran ne'e relata ona iha resposta anterior)

Antes ne'e doutor sira diagnoza ona ita bo'ot ho DENGUE ka lae, iha ita bo'ot nia moris (BELE LIU HUSI FULAN 6 BA KOTUK)?

Have you ever been diagnosed by a healthcare worker with MALARIA in your life (even MORE THAN 6 MONTHS AGO)?

- Yes / Sim  
 No / Lae  
 Don't know / La hatene  
 (Answer 'yes', even if a MALARIA diagnosis within 6 months was reported in previous answers / Hatán 'Sim', maske kuandu diagnoza ho MALARIA iha fulan 6 nia laran ne'e relata ona iha resposta anterior)

Antes ne'e doutor sira diagnoza ona ita bo'ot ho MALARIA ka lae, iha ita bo'ot nia moris (BELE LIU HUSI FULAN 6 BA KOTUK)?

Have you received vaccination for COVID-19?

- Yes / Sim  
 No / Lae

Ita bo'ot simu ona vasinasaun ba COVID-19?

Number of doses

- 1  
 2  
 3  
 More than 3 / Liu husi 3

Numeru dose

When was your FIRST COVID-19 vaccine?

Ita bo'ot nia vasina COVID-19 primeiru ne'e simu iha loron saida?

(Enter approximate date if unsure, leave blank if unknown / Hatama data tuir hanoin karik la serteza, husik mamuk deit karik la hatene)

Which type of COVID-19 vaccine was your FIRST dose?

Vasina COVID-19 nia tipu ida ne'ebé mak ita bo'ot simu ba dose primeiru?

- AstraZenica  
 Sinovac  
 Pfizer  
 Other / Seluk  
 Don't know / La hatene

When was your SECOND COVID-19 vaccine?

Ita bo'ot nia vasina COVID-19 segundu ne'e simu iha loron saida?

(Enter approximate date if unsure, leave blank if unknown / Hatama data tuir hanoin karik la serteza, husik mamuk deit karik la hatene)

Which type of COVID-19 vaccine was your SECOND dose?

Vasina COVID-19 nia tipu ida ne'ebé mak ita bo'ot simu ba dose segundu?

- AstraZenica  
 Sinovac  
 Pfizer  
 Other / Seluk  
 Don't know / La hatene

When was your THIRD COVID-19 vaccine?

Ita bo'ot nia vasina COVID-19 terseiru ne'e simu iha loron saida?

(Enter approximate date if unsure, leave blank if unknown / Hatama data tuir hanoin karik la serteza, husik mamuk deit karik la hatene)

Which type of COVID-19 vaccine was your THIRD dose?

Vasina COVID-19 nia tipu ida ne'ebé mak ita bo'ot simu ba dose terseiru?

- AstraZenica  
 Sinovac  
 Pfizer  
 Other / Seluk  
 Don't know / La hatene

If you have had more than three COVID-19 vaccines, when was your MOST RECENT dose?

Karik ita bo'ot simu vasina COVID-19 barak liu dala tolu, entaun ita bo'ot nia dose ikus liu ne'e simu iha loron saida?

(Enter approximate date if unsure, leave blank if unknown / Hatama data tuir hanoin karik la serteza, husik mamuk deit karik la hatene)

If you have had more than three doses of COVID vaccines, which type have you received for your MOST RECENT DOSE?

Karik ita bo'ot simu vasina COVID-19 ne'e barak liu dala tolu, tipu vasina ida ne'ebé mak ita bo'ot simu ikus liu?

- AstraZenica  
 Sinovac  
 Pfizer  
 Other / Seluk  
 Don't know / La hatene

Do you wish to be vaccinated for COVID-19?

Ita bo'ot hakarak atu simu vasina ba COVID-19?

- Yes / Sim  
 No / Lae  
 Don't know / La hatene  
 Not applicable - too young to answer this question / La aplikavel - sei kiik seidak bele hatán ba pergunta ida ne'e  
 (Only for participants who have not received any doses of COVID-19 vaccines / pergunta ida ne'e husu deit ba partisipante sira ne'ebé mak seidak simu vasina COVID-19 nia dose ruma)

Why have you not received a SECOND dose of COVID-19 vaccine?

Tamba saida mak ita bo'ot seidak simu vasina COVID-19 nia dose segundu?

- It is less than 3 months since my first dose, therefore my second dose is not due yet / Seidak to'o fulan 3, desde hau nia vasina dose primeiru, tamba ne'e hau nia dose segundu nia tempu seidak to'o  
 It is more than 3 months since my first dose, but I have not been offered a second dose yet / Tempu liu tiha ona fulan 3 desde hau nia dose primeiru, maibe hau seidak hetan dose segundu  
 I got COVID-19 infection after my first dose, therefore I don't think I need another dose / Hau hetan infeksaun COVID-19 depois de simu dose primeiru, tamba ne'e hau hanoin hau la presiza dose seluk tan  
 I don't want to have another dose / Hau lakoi atu simu dose seluk tan  
 Other / Seluk  
 (Only asked to participants who have received just one dose of COVID-19 vaccine / Husu deit ba partisipante sira ne'ebé mak simu ona vasina COVID-19 nia dose primeiru)

Why don't you want another dose?

Tamba saida mak ita bo'ot lakoi simu dose segundu?

Please specify

Favor espesifika
