# Supplementary material for: Vaccine Preventable Disease Seroprevalence in a Nationwide Assessment of Timor-Leste (VASINA-TL): study protocol for a population-representative cross-sectional serosurvey
Source: PubMed Central journal article supplement — BMJ Open. 2023 May 18;13(5):e071381. doi: 10.1136/bmjopen-2022-071381 (PMC10201250; doi:10.1136/bmjopen-2022-071381), 2023-05-18
Supplement: bmjopen-2022-071381supp004.pdf [file bmjopen-2022-071381supp004.pdf]

Confidential

National VPD Seroprevalence Survey Timor-Leste

Page 1

## Unable to Complete Questionnaire

Record ID \_\_\_\_\_

**Fill this form if Household Questionnaire cannot be filled out (i.e. no data can be collected from the household)**

Household number \_\_\_\_\_

Why could no data be collected?

- Household occupied but head-of-household does not wish to fill out Household Questionnaire
- Household looks occupied but no adult household members were present during all three visits
- Household looks derelict
- Household has been demolished
- Cannot access household

Please state the reason you couldn't find the household \_\_\_\_\_
