# Supplementary material for: Vaccine Preventable Disease Seroprevalence in a Nationwide Assessment of Timor-Leste (VASINA-TL): study protocol for a population-representative cross-sectional serosurvey
Source: PubMed Central journal article supplement — BMJ Open. 2023 May 18;13(5):e071381. doi: 10.1136/bmjopen-2022-071381 (PMC10201250; doi:10.1136/bmjopen-2022-071381), 2023-05-18
Supplement: bmjopen-2022-071381supp005.pdf [file bmjopen-2022-071381supp005.pdf]

### VASINA fieldwork SOP – data and sample collection

#### For each household, do the following:

- 1. Introduce research team to head-of-household and other household member(s)**
  - Explain study, using patient information sheet
  - Wear mask and visor for this
- 2. Conduct *Household Questionnaire* on RedCap with head-of-household**
  - Fill this out even if no household members give consent for individual data or samples to be collected (if this is the case, head-of-household should still fill consent form)
  - If head-of-household does not wish to fill *Household Questionnaire* on RedCap, fill *Unable to Complete Questionnaire* on RedCap
- 3. Each time you enrol an individual, give them a sticker with their Study ID number on it**
  - Children less than 1 year old should not be enrolled and do not need to be assigned a Study ID number (but their details should still be included on the *Household Questionnaire*)
  - For individuals who are not currently present, assign a study ID number, but keep his/her sticker until the next visit

#### For each participant, do the following:

- 4. Receive written informed consent (signed form)**
  - For children, receive written informed consent from one of their parents
  - Also receive 'verbal assent' from the child
- 5. Conduct *Individual Participant Questionnaire* on RedCap**
- 6. Don PPE**
- 7. Phlebotomy (maximum x2 attempts)**
  - Adults: use needle and syringe to collect 10ml (x2 tubes)
  - Children: use needle and syringe or butterfly to collect 5ml (x1 tube)
  - Also place x9-12 drops onto filter paper to make three blood spots (*see Dried Blood Spot SOP*).
  - Make sure blood tubes and dried blood spots are clearly labelled with stickers
- 8. Finger-prick blood sample (where phlebotomy failed)**
  - Collect 2mls of blood drops into paediatric serum tubes
  - Collect x9-12 drops onto filter paper to make three blood spots.
  - Make sure blood tubes and dried blood spots are clearly labelled with stickers
- 9. Store samples**
  - Put labelled blood samples into cool box

- Allow blood spot to dry for 4 hours, put into zip-lock bag with desiccant sachet. Put this into cool box

**10. Equipment disposal**

- Place all sharps into sharps container
- Place all other phlebotomy equipment into clinical waste bags
- Dengue RDT can be disposed of, after good-quality picture and interpretation is done

**11. Thank household member(s) and make sure they have a copy of the participant information sheet**

**12. Make sure gloves and apron are changed and hands are washed/alcohol gelled before moving onto next participant**
